# Supplementary material for: Efficient enantioselective synthesis of trisubstituted γ-lactam via the Michael addition reaction of 2,3-dioxopyrrolidine with indole in aqueous media
Source: Royal Society of Chemistry journal article supplement (doi:10.1039/d2ob00959e), 2022-01-01
Supplement: d2ob00959e1.pdf [file d2ob00959e1.pdf]

## Supporting Information

### Efficient Enantioselective Synthesis of Trisubstituted $\gamma$ -Lactam Via Michael Addition Reaction of 2,3-dioxopyrrolidine with Indole in Aqueous Media.

John Kamanda Mansaray, Yekai Huang, Kuiliang Li, Xiang Sun, Zhenggen Zha, and Zhiyong Wang\*

Hefei National Research Center for Physical Sciences at Microscale, CAS Key Laboratory of Soft Matter Chemistry & Center for Excellence in Molecular Synthesis of Chinese Academy of Sciences, Technology & School of Chemistry and Materials Science in University of Science and Technology of China Hefei, Anhui 230026, P. R. China.

\*E-mail: [zwang3@ustc.edu.cn](mailto:zwang3@ustc.edu.cn)

---

#### Table of contents

|                                          |     |
|------------------------------------------|-----|
| Part 1 Experiment Section .....          | S1  |
| Part 2 Analytical Data of Products ..... | S5  |
| Part 3 NMR Spectra .....                 | S13 |
| Part 4 HPLC Spectra .....                | S34 |
| Part 5 Mechanistic Studies.....          | S54 |

## Part 1 Experiment Section

### 1.1 General Information

$^1\text{H}$  NMR and  $^{13}\text{C}$  NMR were recorded on a 400 MHz Nuclear Magnetic Resonance Spectrometer ( $^1\text{H}$  NMR: 400 MHz,  $^{13}\text{C}$  NMR: 100 MHz) using TMS as internal reference. The chemical shifts ( $\delta$ ) and coupling constants (J) were expressed in ppm and Hz, respectively. UV-Vis Spectrophotometry was carried out on infrared spectrometer. HPLC analysis was carried out on HPLC with a multiple wavelength detector by commercial chiral columns. Optical rotations were measured on a Polarimeter. HRMS (ESI) were recorded on a Q-TOF Premier. Commercially available compounds were used without further purification. Solvents were purified according to the standard procedures unless otherwise noted. Ligands and various pyrrolidones were prepared according to literature procedures.

### 1.2 General procedures of Indole-Michael Addition Reaction

A mixture of Ligand ( $\text{L}_1$ , 10 mol %, 4.3 mg),  $\text{Cu}(\text{OTf})_2$  (10 mol %, 3.6 mg), Triethylamine (20 mol %, 2.8  $\mu\text{L}$ ) and SLS (10 mol %, 2.6 mg) and in corresponding solvent ( $\text{H}_2\text{O}/\text{Toluene} = 0.9/0.1$  mL) was stirred for 2h at 20 °C. Then the corresponding pyrrolidone (0.1 mmol) and Indole (0.15 mmol) was added. After reaction was finished (monitored by TLC), the system was extracted by dichloromethane. The organic phase was dried with anhydrous sodium sulfate, evaporated in vacuo. Purification of the residue by column chromatography (DCM/MeOH = 100/1) afforded the desired Indole-Michael addition adducts. Finally, the product was further recrystallized in ethanol/water (70/30).

### 1.3 Procedure for Asymmetric Indole-Michael Addition Reaction on a Gram-scale

A mixture of Ligand ( $\text{L}_1$ , 10 mol %, 215 mg),  $\text{Cu}(\text{OTf})_2$  (10 mol %, 180 mg), Triethylamine (20 mol %, 140  $\mu\text{L}$ ), and SLS (10 mol %, 130 mg) and in corresponding solvent ( $\text{H}_2\text{O}/\text{Toluene} = 18/2$  mL) was stirred for 2h at 20 °C. Then the corresponding pyrrolidone (0.1 mmol) and Indole (0.15 mmol) was added. After reaction was finished (monitored by TLC), the system was extracted by dichloromethane. The organic phase was dried with anhydrous sodium sulfate, evaporated in vacuo. Purification of the residue by column chromatography (DCM/ MeOH = 100/1) afforded the desired Indole-Michael addition adducts.

## 1.4 Optimization of Reaction Conditions<sup>a-h</sup>

**Table S1:** Optimization of Reaction Conditions<sup>a-h</sup>

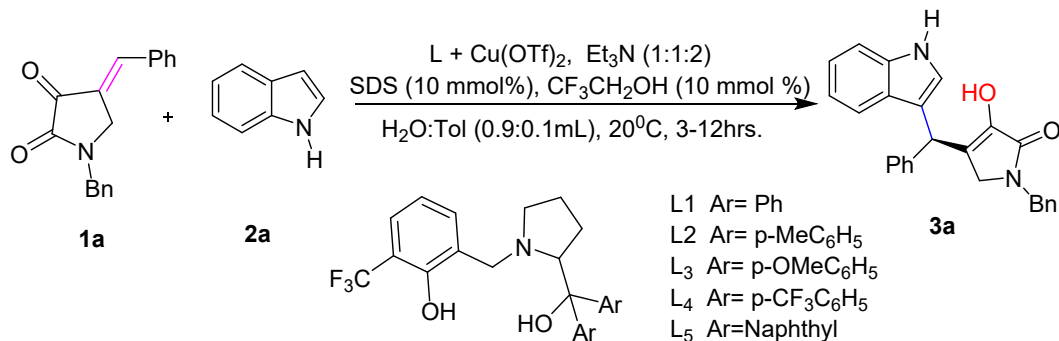

| Entry                 | Ligand               | Solvent (1mL)                       | Yield <sup>b</sup> (%) | ee <sup>c</sup> (%) |
|-----------------------|----------------------|-------------------------------------|------------------------|---------------------|
| 1                     | L <sub>1</sub>       | CHCl <sub>3</sub>                   | 89                     | 84                  |
| 2                     | L <sub>2</sub>       | CHCl <sub>3</sub>                   | 86                     | 77                  |
| 3                     | L <sub>3</sub>       | CHCl <sub>3</sub>                   | 84                     | 79                  |
| 4                     | L <sub>4</sub>       | CHCl <sub>3</sub>                   | 88                     | 83                  |
| 5                     | L <sub>5</sub>       | CHCl <sub>3</sub>                   | 82                     | 73                  |
| 6                     | L <sub>1</sub>       | iPrOH                               | 87                     | 80                  |
| 7                     | L <sub>1</sub>       | Toulene                             | 91                     | 85                  |
| 8                     | L <sub>1</sub>       | Acetone: MeOH                       | 88                     | 82                  |
| 9                     | L <sub>1</sub>       | MTBE                                | 85                     | 83                  |
| 10                    | L <sub>1</sub>       | H <sub>2</sub> O                    | 78                     | 89                  |
| 11                    | L <sub>1</sub>       | H <sub>2</sub> O/Tol (0.5/05)       | 83                     | 94                  |
| 12                    | L <sub>1</sub>       | H <sub>2</sub> O/Tol (0.7/03)       | 81                     | 93                  |
| 13                    | L <sub>1</sub>       | H <sub>2</sub> O/Tol (0.9/0.1)      | 83                     | 94                  |
| <b>14<sup>d</sup></b> | <b>L<sub>1</sub></b> | <b>H<sub>2</sub>O/Tol (0.9/0.1)</b> | <b>86</b>              | <b>99</b>           |
| 15 <sup>e</sup>       | L <sub>1</sub>       | H <sub>2</sub> O/Tol (0.9/0.1)      | 76                     | 41                  |
| 16 <sup>f</sup>       | L <sub>1</sub>       | H <sub>2</sub> O/Tol (0.9/0.1)      | 79                     | 77                  |
| 17 <sup>g</sup>       | L <sub>1</sub>       | H <sub>2</sub> O/Tol (0.9/0.1)      | 80                     | 96                  |
| 18 <sup>h</sup>       | L <sub>1</sub>       | H <sub>2</sub> O/Tol (0.9/0.1)      | 72                     | 74                  |

<sup>a</sup>Unless otherwise noted the reaction was performed with **1a** (0.1 mmol), **2a** (0.15 mmol), **L** (10 mol %), and Cu(OTf)<sub>2</sub> (10 mol %), Triethylamine 20 mol %, Sodium dodecyl sulfonate SDS as the surfactant 10 mol % . <sup>b</sup>Isolated yield. <sup>c</sup>Determined by chiral HPLC. <sup>d</sup>CF<sub>3</sub>CH<sub>2</sub>OH 10 mol% as additive. <sup>e</sup>Triethylamine 10 mol%. <sup>f</sup>Triethylamine 20 mol% <sup>g</sup>Taurdeoxycholate Sodium Salt TSS (10 mol %) as the surfactant and <sup>h</sup>Deoxycholic acid sodium Salt DSS (10 mol %) as the surfactant.

## 1.5 Optimization of Surfactants, Additives and Bases<sup>a</sup>

In order to study the effect of the surfactant in the reaction, the scope of the surfactant was expanded. Several surfactant (containing lipophilic ions and alkyl chain) were combined with  $L_1$  in an attempt to strengthen the binding ability to form an emulsion to catalyze this asymmetric reaction in water. Various surfactant employed affords a good yield and excellent enantio excess. It was found that SDS was the best in this reaction, which could enhance the reaction yield to 86% and an excellent enantioselectivity 99% ee. Furthermore, the reaction was conducted without a surfactant (Table 2, entry 10) we observed a decrease in the rate of the reaction (24h instead of 3-12h) with similar enantio excess. Hence the addition of the surfactant enhanced the reaction rate however, with no significance influence on the yield and enantiomeric excess.

**Table S2:** Optimization of Surfactants, Additives and Bases<sup>a</sup>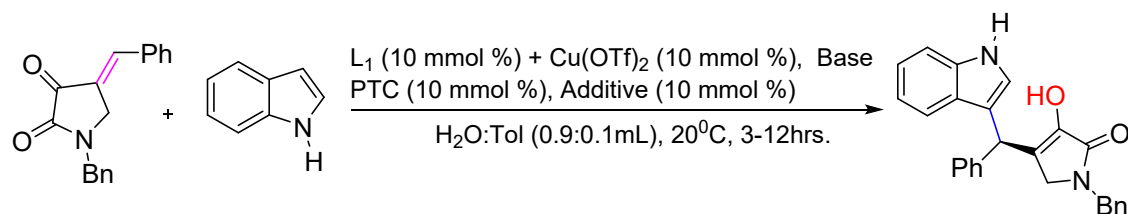

| Entry | PTC                             | Additive                           | Base              | Yield (%) <sup>b</sup> | ee(%) <sup>c</sup> |
|-------|---------------------------------|------------------------------------|-------------------|------------------------|--------------------|
| 1     | SDS                             | CF <sub>3</sub> CH <sub>2</sub> OH | Et <sub>3</sub> N | 86                     | 99                 |
| 2     | SDS                             | HFIP                               | Et <sub>3</sub> N | 85                     | 92                 |
| 3     | SDS                             | MeOH                               | Et <sub>3</sub> N | 83                     | 98                 |
| 4     | TSS                             | CF <sub>3</sub> CH <sub>2</sub> OH | Et <sub>3</sub> N | 80                     | 96                 |
| 5     | DSS                             | CF <sub>3</sub> CH <sub>2</sub> OH | Et <sub>3</sub> N | 72                     | 74                 |
| 7     | SHS                             | CF <sub>3</sub> CH <sub>2</sub> OH | Et <sub>3</sub> N | 82                     | 96                 |
| 8     | BU <sub>4</sub> NI              | CF <sub>3</sub> CH <sub>2</sub> OH | Et <sub>3</sub> N | 71                     | 99                 |
| 9     | NH <sub>4</sub> PF <sub>6</sub> | CF <sub>3</sub> CH <sub>2</sub> OH | Et <sub>3</sub> N | 63                     | 95                 |
| 10    | -                               | CF <sub>3</sub> CH <sub>2</sub> OH | Et <sub>3</sub> N | 78                     | 96                 |
| 10    | SDS                             | CF <sub>3</sub> CH <sub>2</sub> OH | DIPEA             | 81                     | 98                 |
| 11    | SDS                             | CF <sub>3</sub> CH <sub>2</sub> OH | DABCO             | 79                     | 84                 |
| 12    | SDS                             | CF <sub>3</sub> CH <sub>2</sub> OH | N-Morpholine      | 83                     | 85                 |
| 13    | SDS                             | CF <sub>3</sub> CH <sub>2</sub> OH | Piperidine        | 86                     | 91                 |
| 14    | SDS                             | CF <sub>3</sub> CH <sub>2</sub> OH | CsCO <sub>3</sub> | 83                     | 91                 |
| 15    | SDS                             | CF <sub>3</sub> CH <sub>2</sub> OH | t-BuOK            | 82                     | 96                 |

<sup>a</sup>Unless otherwise noted the reaction was performed with **1a** (0.1 mmol), **2a** (0.15 mmol), **L<sub>1</sub>** (10 mol %), and Cu(OTf)<sub>2</sub> (10 mol %). <sup>b</sup>Isolated yield. <sup>c</sup>Determined by chiral HPLC. PTC= Sodium dodecyl sulfonate SDS (10 mol %), Taurdeoxycholate Sodium Salt TSS (10 mol %), Deoxycholic acid sodium Salt DSS (10 mol %), Sodium hexadecane-1-sulfonate SHS (10 mol %), Tetrabutylammonium iodide BU<sub>4</sub>NI (10 mol %), Ammonium hexafluorophosphate NH<sub>4</sub>PF<sub>6</sub> (10 mol %).

## Part 2: The Analytical Data of Products

### (S)-4-((1H-indol-3-yl)(phenyl)methyl)-1-benzyl-3-hydroxy-1,5-dihydro-2H-pyrrol-2-one (3a)

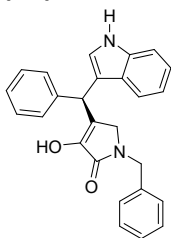

The title compound was prepared according to the general working procedure (6h) and purified by column chromatography (DCM/MeOH = 100/1) to give the product as a white solid 33.9 mg, 86% yield; mp = 193-197 °C;  $[\alpha]_D^{20} +19.0$  (c = 1.0, CH<sub>2</sub>Cl<sub>2</sub>, 99% ee); HPLC: Daicel Chiralpak AD-H, hexane: 2-propanol = 60:40, flow rate = 1.0 mL/min, T = 23°C, UV = 254 nm,  $t_R = 6.58$  min (major),  $t_R = 12.3$  min (minor); <sup>1</sup>H NMR (500 MHz, DMSO) δ 10.92 (s, 1H), 9.53 (s, 1H), 7.34 (d, *J* = 8.1 Hz, 1H), 7.29 – 7.24 (m, 5H), 7.18 – 7.14 (m, 1H), 7.12 (d, *J* = 7.3 Hz, 2H), 7.04 (t, *J* = 7.5 Hz, 1H), 6.96 (s, 1H), 6.87 (t, *J* = 7.4 Hz, 1H), 5.59 (s, 1H), 4.58 – 4.46 (m, 2H), 3.64 (d, *J* = 18.4 Hz, 1H), 3.57 (d, *J* = 18.4 Hz, 1H). <sup>13</sup>C NMR (126 MHz, DMSO) δ 166.9, 142.4, 142.1, 137.7, 136.5, 128.7, 128.4, 128.1, 127.3, 127.2, 126.5, 126.4, 123.4, 123.0, 121.18, 118.7, 118.5, 115.2, 111.6, 47.7, 45.5, 38.6. HRMS (ESI TOF) *m/z*: [M+Na]<sup>+</sup> calcd for C<sub>26</sub>H<sub>22</sub>N<sub>2</sub>NaO<sub>2</sub> 417.1573; found 417.1569.

### (S)-4-((1H-indol-3-yl)(p-tolyl)methyl)-1-benzyl-3-hydroxy-1,5-dihydro-2H-pyrrol-2-one (3b)

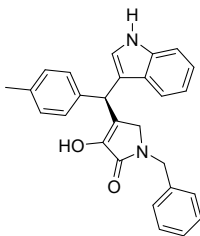

The title compound was prepared according to the general working procedure (6h) and purified by column chromatography (DCM/MeOH = 100/1) to give the product as a white solid 33.1 mg, 81% yield; mp = 220-225 °C;  $[\alpha]_D^{20} +5.0$  (c = 0.33, CH<sub>2</sub>Cl<sub>2</sub>, 93% ee); HPLC: Daicel Chiralpak AD-H, hexane: 2-propanol = 60:40, flow rate = 1.0 mL/min, T = 23°C, UV = 254 nm,  $t_R = 27.0$  min (major),  $t_R = 14.6$  min (minor); <sup>1</sup>H NMR (500 MHz, DMSO) δ 10.97 (s, 1H), 9.53 (s, 1H), 7.35 (d, *J* = 7.4 Hz, 1H), 7.27 (d, *J* = 6.2 Hz, 2H), 7.22 (d, *J* = 6.2 Hz, 1H), 7.19 – 7.10 (m, 5H), 7.09 – 7.02 (m, 3H), 6.96 (s, 1H), 6.88 (d, *J* = 6.3 Hz, 1H), 5.58 (s, 1H), 4.51 (s, 2H), 3.60 (dd, *J* = 44.1, 18.3 Hz, 2H), 2.23 (s, 3H). <sup>13</sup>C NMR (126 MHz, DMSO) δ 167.0, 141.9, 139.3, 137.8, 136.5, 135.3, 129.0, 128.6, 127.9, 127.3, 127.2, 126.5, 123.4, 123.3, 121.1, 118.7, 118.5, 115.3, 111.6, 47.7, 45.5, 38.2, 20.6. HRMS (ESI TOF) *m/z*: [M+Na]<sup>+</sup> calcd for C<sub>27</sub>H<sub>24</sub>N<sub>2</sub>NaO<sub>2</sub> 431.1730 found 431.1730.

### (S)-4-((1H-indol-3-yl)(4-methoxyphenyl)methyl)-1-benzyl-3-hydroxy-1,5-dihydro-2H-pyrrol-2-one (3c)

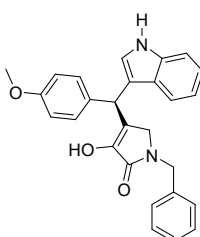

The title compound was prepared according to the general working procedure (6h) and purified by column chromatography (DCM/MeOH = 100/1) to give the product as a white solid 35.7 mg, 84% yield; mp = 72-76 °C;  $[\alpha]_D^{20} +22.7$  (c = 1.0, CH<sub>2</sub>Cl<sub>2</sub>, 99% ee); HPLC: Daicel Chiralpak AD-H, hexane: 2-propanol = 60:40, flow rate = 1.0 mL/min, T = 23°C, UV = 254 nm,  $t_R = 7.8$  min (major),  $t_R = 4.3$  min (minor); <sup>1</sup>H NMR (500

MHz, DMSO)  $\delta$  10.90 (s, 1H), 9.49 (s, 1H), 7.27 (ddd,  $J$  = 33.2, 15.0, 7.7 Hz, 3H), 7.18 – 7.08 (m, 6H), 7.03 (t,  $J$  = 7.5 Hz, 1H), 6.93 (d,  $J$  = 1.5 Hz, 1H), 6.90 – 6.77 (m, 3H), 5.52 (s, 1H), 4.50 (s, 2H), 3.70 (s, 3H), 3.58 (dd,  $J$  = 44.3, 18.4 Hz, 2H).  $^{13}\text{C}$  NMR (126 MHz, DMSO)  $\delta$  167.0, 157.7, 141.8, 137.8, 136.5, 134.3, 129.0, 128.6, 127.3, 127.2, 126.4, 123.4, 123.3, 121.1, 118.7, 118.4, 115.5, 113.7, 111.6, 47.7, 45.5, 37.8. HRMS (ESI TOF)  $m/z$ :  $[\text{M}+\text{Na}]^+$  calcd for  $\text{C}_{27}\text{H}_{24}\text{N}_2\text{NaO}_3$  447.1679 found 447.1675.

**(S)-1-benzyl-4-((4-chlorophenyl)(1H-indol-3-yl)methyl)-3-hydroxy-1,5-dihydro-2H-pyrrol-2-one (3d)**

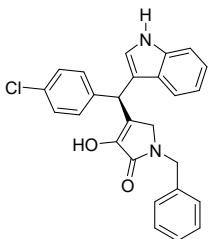

The title compound was prepared according to the general working procedure (6h) and purified by column chromatography (DCM/MeOH= 100/1) to give the product as a white solid 34.7mg, 81% yield; mp =240-245 °C;  $[\alpha]_{\text{D}}^{20}$  +63.6 ( $c$  = 1.0,  $\text{CH}_2\text{Cl}_2$ , 95% ee); HPLC: Daicel Chiralpak AD-H, hexane: 2-propanol = 60:40, flow rate = 1.0 mL/min,  $T$  = 23°C, UV = 254 nm,  $t_{\text{R}}$  =31.0min (major),  $t_{\text{R}}$  =15.4min (minor);  $^1\text{H}$  NMR (500 MHz, DMSO)  $\delta$  11.03 (s, 1H), 9.60 (s, 1H), 7.28 (ddd,  $J$  = 20.0, 16.3, 8.6 Hz, 8H), 7.14 (dd,  $J$  = 11.2, 7.9 Hz, 3H), 7.08 – 7.00 (m, 1H), 6.98 (d,  $J$  = 1.8 Hz, 1H), 6.88 (t,  $J$  = 7.4 Hz, 1H), 5.59 (s, 1H), 4.54 (d,  $J$  = 17.9 Hz, 1H), 4.48 (d,  $J$  = 15.4 Hz, 1H), 3.60 (q,  $J$  = 18.5 Hz, 2H).  $^{13}\text{C}$  NMR (126 MHz,  $\text{CDCl}_3$ )  $\delta$  166.8, 142.3, 141.4, 137.7, 136.5, 130.8, 129.9, 128.6, 128.3, 127.2, 127.2, 126.2, 123.5, 122.3, 121.2, 118.6, 114.6, 111.6, 47.7, 45.5, 38.0. HRMS (ESI TOF)  $m/z$ :  $[\text{M}+\text{Na}]^+$  calcd for  $\text{C}_{26}\text{H}_{21}\text{ClN}_2\text{NaO}_2$  451.1184 found 451.1188.

**(S)-1-benzyl-4-((4-bromophenyl)(1H-indol-3-yl)methyl)-3-hydroxy-1,5-dihydro-2H-pyrrol-2-one (3e)**

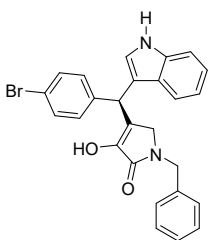

The title compound was prepared according to the general working procedure (6h) and purified by column chromatography (DCM/MeOH= 100/1) to give the product as a white solid 39.6 mg, 84% yield; mp =222-227 °C;  $[\alpha]_{\text{D}}^{20}$  +40.3 ( $c$  = 1.0,  $\text{CH}_2\text{Cl}_2$ , 96% ee); HPLC: Daicel Chiralpak AD-H, hexane: 2-propanol = 60:40, flow rate = 1.0 mL/min,  $T$  = 23°C, UV = 254 nm,  $t_{\text{R}}$  =29.7 min (major),  $t_{\text{R}}$  =12.4 min (minor);  $^1\text{H}$  NMR (500 MHz, DMSO)  $\delta$  10.97 (s, 1H), 9.58 (s, 1H), 7.45 (d,  $J$  = 8.4 Hz, 2H), 7.38 – 7.09 (m, 9H), 7.04 (t,  $J$  = 7.5 Hz, 1H), 6.99 (d,  $J$  = 1.7 Hz, 1H), 6.88 (t,  $J$  = 7.4 Hz, 1H), 5.55 (s, 1H), 4.51 (dd,  $J$  = 33.7, 15.5 Hz, 2H), 3.63 (d,  $J$  = 18.4 Hz, 1H), 3.57 (d,  $J$  = 18.5 Hz, 1H).  $^{13}\text{C}$  NMR (126 MHz, DMSO)  $\delta$  167.3, 142.8, 142.3, 138.1, 137.0, 131.7, 131.4, 130.9, 130.7, 129.1, 128.3, 127.7, 127.7, 126.7, 124.0, 122.7, 121.7, 119.8, 119.0, 119.0, 115.0, 112.1, 48.2, 46.0, 38.5. HRMS (ESI TOF)  $m/z$ :  $[\text{M}+\text{Na}]^+$  calcd for  $\text{C}_{26}\text{H}_{21}\text{BrN}_2\text{NaO}_2$  495.0679 found 495.0683.

**(S)-4-((1H-indol-3-yl)(4-nitrophenyl)methyl)-1-benzyl-3-hydroxy-1,5-dihydro-2H-pyrrol-2-one (3f)**

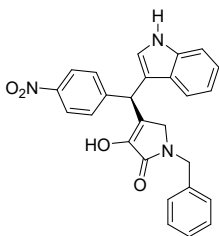

The title compound was prepared according to the general working procedure (8h) and purified by column chromatography (DCM/MeOH= 100/1) to give the product as a yellow solid 37.8 mg, 86% yield; mp =110-115 °C;  $[\alpha]_D^{20}$  +10.9 (c = 0.3, CH<sub>2</sub>Cl<sub>2</sub>, 99% ee); HPLC: Daicel Chiralpak AD-H, hexane: 2-propanol = 60:40, flow rate = 1.0 mL/min, T = 23°C, UV = 254 nm,  $t_R$  = 26.6 min (major),  $t_R$  =13.4 min (minor); <sup>1</sup>H NMR (500 MHz, DMSO)  $\delta$  11.05 (s, 1H), 9.74 (s, 1H), 8.15 (d, *J* = 8.6 Hz, 2H), 7.53 (d, *J* = 8.6 Hz, 2H), 7.37 (d, *J* = 8.1 Hz, 1H), 7.30 (t, *J* = 7.4 Hz, 2H), 7.23 (t, *J* = 7.2 Hz, 1H), 7.16 (dd, *J* = 19.7, 7.6 Hz, 3H), 7.06 (t, *J* = 7.3 Hz, 2H), 6.90 (t, *J* = 7.4 Hz, 1H), 5.71 (s, 1H), 4.53 (dd, *J* = 40.4, 15.3 Hz, 2H), 3.66 (q, *J* = 18.5 Hz, 2H). <sup>13</sup>C NMR (126 MHz, DMSO)  $\delta$  167.3, 151.0, 146.5, 143.4, 138.1, 137.0, 129.8, 129.1, 127.8, 127.7, 126.6, 124.3, 124.0, 121.8, 121.5, 119.2, 118.9, 114.4, 112.2, 48.4, 46.0, 39.1. HRMS (ESI TOF) *m/z*: [M+Na]<sup>+</sup> calcd for C<sub>26</sub>H<sub>21</sub>N<sub>3</sub>NaO<sub>4</sub> 462.1424 found 462.1420.

**(S)-4-((1H-indol-3-yl)(3-methoxyphenyl)methyl)-1-benzyl-3-hydroxy-1,5-dihydro-2H-pyrrol-2-one (3g)**

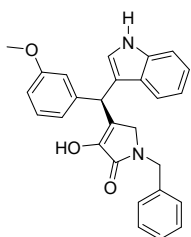

The title compound was prepared according to the general working procedure (6h) and purified by column chromatography (DCM/MeOH= 100/1) to give the product as a white solid 36 mg, 86% yield; mp =80-85 °C;  $[\alpha]_D^{20}$  +5.4 (c = 1.0, CH<sub>2</sub>Cl<sub>2</sub>, 99% ee); HPLC: Daicel Chiralpak AD-H, hexane: 2-propanol = 60:40, flow rate = 1.0 mL/min, T = 23°C, UV = 254 nm,  $t_R$  =22.8 min (major),  $t_R$  =29.2 min (minor); <sup>1</sup>H NMR (500 MHz, DMSO)  $\delta$  10.98 (s, 1H), 9.55 (s, 1H), 7.36 – 7.07 (m, 8H), 7.02 (dt, *J* = 7.4, 5.8 Hz, 1H), 6.96 (d, *J* = 1.8 Hz, 1H), 6.88 (t, *J* = 7.5 Hz, 1H), 6.81 (d, *J* = 7.8 Hz, 1H), 6.76 (dd, *J* = 10.6, 4.2 Hz, 2H), 5.56 (s, 1H), 4.56 – 4.45 (m, 2H), 3.67 (s, 3H), 3.59 (dd, *J* = 27.4, 12.1 Hz, 2H). <sup>13</sup>C NMR (126 MHz, DMSO)  $\delta$  167.30, 159.7, 144.4, 142.5, 138.2, 136.9, 129.8, 129.1, 127.7, 127.7, 126.9, 123.8, 123.3, 121.6, 120.8, 119.1, 118.9, 115.4, 114.5, 112.0, 111.8, 48.2, 45.9, 39.0. HRMS (ESI TOF) *m/z*: [M+H]<sup>+</sup> calcd for C<sub>27</sub>H<sub>24</sub>N<sub>2</sub>NaO<sub>3</sub> 447.1679 found 447.1669.

**(S)-4-((1H-indol-3-yl)(o-tolyl)methyl)-1-benzyl-3-hydroxy-1,5-dihydro-2H-pyrrol-2-one (3h)**

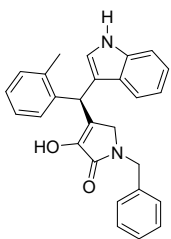

The title compound was prepared according to the general working procedure (6h) and purified by column chromatography (DCM/MeOH= 100/1) to give the product as a white solid 33.1 mg, 81% yield; mp =77-82°C;  $[\alpha]_D^{20}$  +4.3 (c = 1.0, CH<sub>2</sub>Cl<sub>2</sub>, 90% ee); HPLC: Daicel Chiralpak AD-H, hexane: 2-propanol = 60:40, flow rate = 1.0 mL/min, T = 23°C, UV = 254 nm,  $t_R$  =32.2 min (major),  $t_R$  =17.4 min (minor); <sup>1</sup>H NMR (500 MHz, Acetone)  $\delta$  10.20 (s, 1H), 8.26 (s, 1H), 7.49 (d, *J* = 8.1 Hz, 1H), 7.40 (t, *J* = 7.3 Hz, 2H), 7.37 – 7.25 (m, 4H), 7.24 – 7.10 (m, 5H), 7.01 (t, *J* = 7.5 Hz, 2H), 5.94 (s, 1H), 4.69 (q, *J* = 15.2 Hz, 2H), 3.82 (d, *J* = 18.3 Hz, 1H), 3.59 (d, *J* = 18.3 Hz, 1H), 2.16 (dt, *J* =



4.3, 2.2 Hz, 4H).  $^{13}\text{C}$  NMR (126 MHz, DMSO)  $\delta$  167.4, 142.7, 141.0, 138.2, 137.0, 136.1, 130.7, 129.1, 127.9, 127.7, 126.9, 126.7, 126.3, 123.9, 122.6, 121.6, 119.0, 118.9, 115.5, 112.0, 48.3, 45.9, 35.4. HRMS (ESI TOF)  $m/z$ :  $[\text{M}+\text{H}]^+$  calcd for  $\text{C}_{27}\text{H}_{25}\text{N}_2\text{O}_2$  409.1911 found 409.1906.

**(S)-1-benzyl-4-((2-bromophenyl)(1H-indol-3-yl)methyl)-3-hydroxy-1,5-dihydro-2H-pyrrol-2-one (3i)**

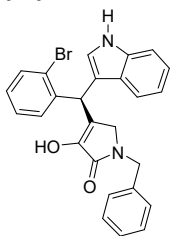

The title compound was prepared according to the general working procedure (6h) and purified by column chromatography (DCM/MeOH=100/1) to give the product as a white solid 40.0 mg, 85% yield; mp= 101-105°C;  $[\alpha]_{\text{D}}^{20}$  +26.2 (c = 0.5,  $\text{CH}_2\text{Cl}_2$ , 99% ee); HPLC: Daicel Chiralpak AD-H, hexane: 2-propanol = 60:40, flow rate = 1.0 mL/min, T = 23°C, UV = 254 nm,  $t_{\text{R}}$  = 27.4 min (major),  $t_{\text{R}}$  =16.2 min (minor);  $^1\text{H}$  NMR (500 MHz, DMSO)  $\delta$  11.01 (s, 1H), 9.49 (s, 1H), 7.61 (dd,  $J$  = 7.9, 1.0 Hz, 1H), 7.37 – 7.27 (m, 3H), 7.26 – 7.18 (m, 2H), 7.16 – 7.09 (m, 4H), 7.05 (dd,  $J$  = 15.6, 7.6 Hz, 2H), 6.93 – 6.84 (m, 2H), 5.80 (s, 1H), 4.58 – 4.46 (m, 2H), 3.68 (d,  $J$  = 18.5 Hz, 1H), 3.42 (s, 1H), 3.41 – 3.41 (m, 1H).  $^{13}\text{C}$  NMR (126 MHz, DMSO)  $\delta$  167.4, 143.2, 141.7, 138.1, 137.0, 133.1, 130.5, 129.1, 129.0, 128.1, 127.6, 126.6, 124.3, 124.2, 121.7, 121.2, 119.1, 118.8, 114.7, 112.1, 48.6, 46.0, 39.1. HRMS (ESI TOF)  $m/z$ :  $[\text{M}+\text{Na}]^+$  calcd for  $\text{C}_{26}\text{H}_{21}\text{BrN}_2\text{NaO}_2$  495.0679 found 495.0698.

**(S)-4-((1H-indol-3-yl)(naphthalen-1-yl)methyl)-1-benzyl-3-hydroxy-1,5-dihydro-2H-pyrrol-2-one (3j)**

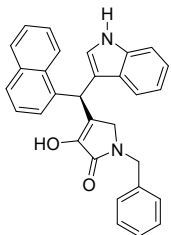

The title compound was prepared according to the general working procedure (6 h) and purified by column chromatography (DCM/MeOH=100/1) to give the product as a white solid 37.3 mg, 84% yield; mp =232-237 °C;  $[\alpha]_{\text{D}}^{20}$  +6.3 (c = 1.0,  $\text{CH}_2\text{Cl}_2$ , 93% ee); HPLC: Daicel Chiralpak AD-H, hexane: 2-propanol = 60:40, flow rate = 1.0 mL/min, T = 23°C, UV = 254 nm,  $t_{\text{R}}$  =34.6 min (major),  $t_{\text{R}}$  = 8.05 min (minor);  $^1\text{H}$  NMR (500 MHz, DMSO)  $\delta$  10.96 (s, 1H), 9.57 (s, 1H), 7.82 (ddd,  $J$  = 40.0, 22.9, 18.2 Hz, 4H), 7.44 (ddd,  $J$  = 9.8, 9.1, 3.7 Hz, 3H), 7.28 (ddd,  $J$  = 34.4, 22.5, 7.8 Hz, 4H), 7.15 (dd,  $J$  = 21.4, 7.6 Hz, 3H), 7.09 – 6.98 (m, 2H), 6.86 (t,  $J$  = 7.5 Hz, 1H), 5.77 (s, 1H), 4.52 (q,  $J$  = 15.3 Hz, 2H), 3.67 (dd,  $J$  = 37.7, 18.5 Hz, 2H).  $^{13}\text{C}$  NMR (126 MHz, DMSO)  $\delta$  167.4, 142.7, 140.5, 138.2, 137.0, 133.5, 132.3, 129.1, 128.3, 128.1, 127.9, 127.7, 127.4, 126.9, 126.5, 126.3, 126.0, 124.0, 123.2, 121.6, 119.1, 119.0, 115.4, 112.1, 48.3, 46.0, 39.2. HRMS (ESI TOF)  $m/z$ :  $[\text{M}+\text{Na}]^+$  calcd for  $\text{C}_{30}\text{H}_{24}\text{N}_2\text{NaO}_2$  467.1730 found 467.1733.

**(S)-4-((1H-indol-3-yl)(thiophen-2-yl)methyl)-1-benzyl-3-hydroxy-1,5-dihydro-2H-pyrrol-2-one (3k)**

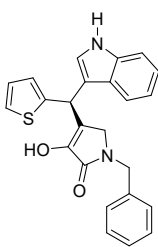

The title compound was prepared according to the general working procedure (6 h) and purified by column chromatography (DCM/MeOH=100/1) to give the product as a white solid 31.3mg, 81% yield; mp =98-103 °C;  $[\alpha]_D^{20} +27.0$  (c = 1.0, CH<sub>2</sub>Cl<sub>2</sub>, 69% ee); HPLC: Daicel Chiralpak AD-H, hexane: 2- propanol = 60:40, flow rate = 1.0 mL/min, T = 23°C, UV = 254 nm,  $t_R = 29.3$  min (major),  $t_R = 15.1$  min (minor); <sup>1</sup>H NMR (500 MHz, DMSO)  $\delta$  11.04 (s, 1H), 9.75 (s, 1H), 7.35 (dd, *J* = 10.6, 6.6 Hz, 3H), 7.29 (dd, *J* = 12.5, 7.5 Hz, 3H), 7.22 (t, *J* = 7.2 Hz, 1H), 7.14 – 7.04 (m, 4H), 6.94 (dd, *J* = 11.6, 5.9 Hz, 2H), 6.88 (d, *J* = 2.9 Hz, 1H), 5.92 (s, 1H), 4.55 (d, *J* = 15.3 Hz, 1H), 4.46 (d, *J* = 15.3 Hz, 1H), 3.72 (d, *J* = 18.3 Hz, 1H), 3.53 (d, *J* = 18.3 Hz, 1H). <sup>13</sup>C NMR (126 MHz, DMSO)  $\delta$  167.1, 146.4, 142.4, 138.1, 136.77, 129.1, 127.7, 127.7, 127.3, 126.6, 125.5, 124.8, 123.7, 123.0, 121.7, 119.1, 118.9, 115.5, 112.1, 47.5, 45.9, 33.99. HRMS (ESI TOF) *m/z*: [M+Na]<sup>+</sup> calcd for C<sub>24</sub>H<sub>20</sub>N<sub>2</sub>NaO<sub>2</sub>S 423.1138 found 423.1143.

**(S)-4-((1H-indol-3-yl)(phenyl)methyl)-3-hydroxy-1-propyl-1,5-dihydro-2H-pyrrol-2-one (3l)**

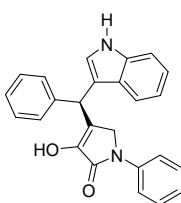

The title compound was prepared according to the general working procedure (6h) and purified by column chromatography (DCM/MeOH=100/1) to give the product as a white solid 32.7mg, 86% yield; mp =200-205°C;  $[\alpha]_D^{20} +3.3$  (c = 0.5, CH<sub>2</sub>Cl<sub>2</sub>, 91% ee); HPLC: Daicel Chiralpak AD-H, hexane: 2- propanol = 60:40, flow rate = 1.0 mL/min, T = 23°C, UV = 254 nm,  $t_R = 6.4$  min (major),  $t_R = 11.0$  min (minor); <sup>1</sup>H NMR (500 MHz, DMSO)  $\delta$  10.99 (s, 1H), 9.65 (s, 1H), 7.71 (d, *J* = 8.3 Hz, 2H), 7.37 (d, *J* = 7.4 Hz, 3H), 7.32 (td, *J* = 7.8, 3.2 Hz, 4H), 7.23 (t, *J* = 7.3 Hz, 2H), 7.17 (d, *J* = 1.8 Hz, 1H), 7.06 (dd, *J* = 11.6, 7.4 Hz, 2H), 6.90 (t, *J* = 7.5 Hz, 1H), 5.66 (s, 1H), 4.27 (d, *J* = 17.8 Hz, 1H), 4.16 (d, *J* = 17.8 Hz, 1H). <sup>13</sup>C NMR (126 MHz, DMSO)  $\delta$  166.3, 142.7, 142.6, 139.8, 136.9, 129.4, 128.9, 128.6, 127.0, 126.9, 124.2, 123.9, 123.7, 121.6, 119.0, 119.0, 118.4, 115.1, 112.0, 48.7, 39.1. HRMS (ESI TOF) *m/z*: [M+Na]<sup>+</sup> calcd for C<sub>25</sub>H<sub>20</sub>N<sub>2</sub>NaO<sub>2</sub> 403.1417 found 403.1415.

**(S)-4-((1H-indol-3-yl)(phenyl)methyl)-3-hydroxy-1-propyl-1,5-dihydro-2H-pyrrol-2-one (3m)**

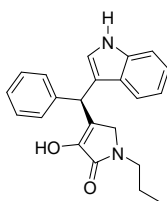

The title compound was prepared according to the general working procedure (6h) and purified by column chromatography (DCM/MeOH=100/1) to give the product as a white solid 27.0 mg, 78% yield; mp= 92-97°C;  $[\alpha]_D^{20} +5.3$  (c = 1.0, CH<sub>2</sub>Cl<sub>2</sub>, 99% ee); HPLC: Daicel Chiralpak AD-H, hexane: 2-propanol = 60:40, flow rate = 1.0 mL/min, T = 23°C, UV = 254 nm,  $t_R = 4.85$  min (major),  $t_R = 5.65$  min (minor); <sup>1</sup>H NMR (500 MHz, DMSO)  $\delta$  10.99 (s, 1H), 9.36 (s, 1H), 7.31 (dt, *J* = 14.8, 8.1 Hz, 5H), 7.19 (dd, *J* = 23.9, 7.3 Hz, 2H), 7.07 – 6.98 (m, 2H), 6.87 (t, *J* = 7.4 Hz, 1H), 5.57 (s, 1H), 3.66 (dd, *J* = 40.8, 18.5 Hz, 2H), 3.23 (t, *J* = 7.2 Hz, 2H), 1.43 (dd, *J* = 14.5, 7.3 Hz, 2H), 0.75 (t, *J* = 7.4 Hz, 3H). <sup>13</sup>C NMR (126 MHz, DMSO)  $\delta$  167.1, 143.0, 142.6, 136.9, 128.8, 128.5, 126.9, 126.7, 123.9, 122.7,

121.6, 119.1, 118.9, 115.7, 112.0, 48.3, 43.9, 39.0, 21.6, 11.6. HRMS (ESI TOF) m/z: [M+Na]<sup>+</sup> calcd for C<sub>22</sub>H<sub>22</sub>N<sub>2</sub>NaO<sub>2</sub> 369.1573 found 369.1579.

**(S)-4-((1H-indol-3-yl)(phenyl)methyl)-1-cyclohexyl-3-hydroxy-1,5-dihydro-2H-pyrrol-2-one (3n)**

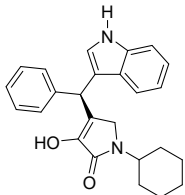

The title compound was prepared according to the general working procedure (6h) and purified by column chromatography (DCM/MeOH=100/1) to give the product as a white solid 31.3mg, 81% yield; mp =238-243 °C; [α]<sub>D</sub><sup>20</sup> +4.3 (c = 1.0, CH<sub>2</sub>Cl<sub>2</sub>, 91% ee); HPLC: Daicel Chiralpak AD-H, hexane: 2-propanol = 60:40, flow rate = 1.0 mL/min, T = 23°C, UV = 254 nm, t<sub>R</sub> =6.4 min (major), t<sub>R</sub> =11.0 min (minor); <sup>1</sup>H NMR (500 MHz, DMSO) δ 10.98 (s, 1H), 9.34 (s, 1H), 7.35 (d, J = 8.1 Hz, 1H), 7.32 – 7.24 (m, 4H), 7.20 (ddd, J = 17.5, 10.0, 5.4 Hz, 2H), 7.03 (dd, J = 14.9, 4.5 Hz, 2H), 6.88 (t, J = 7.4 Hz, 1H), 5.56 (s, 1H), 3.65 (dd, J = 43.8, 18.4 Hz, 2H), 1.69 (d, J = 11.5 Hz, 2H), 1.57 (t, J = 15.7 Hz, 3H), 1.36 – 1.20 (m, 5H). <sup>13</sup>C NMR (126 MHz, DMSO) δ 166.5, 143.1, 142.6, 136.9, 128.8, 128.5, 126.9, 126.7, 123.9, 122.8, 121.5, 119.1, 118.9, 115.6, 112.0, 44.7, 39.0, 30.9, 25.6, 25.3. HRMS (ESI TOF) m/z: [M+Na]<sup>+</sup> calcd for C<sub>25</sub>H<sub>26</sub>N<sub>2</sub>NaO<sub>2</sub> 409.1886 found 409.1877.

**(S)-1-benzyl-3-hydroxy-4-((5-methyl-1H-indol-3-yl)(phenyl)methyl)-1,5-dihydro-2H-pyrrol-2-one (3o).**

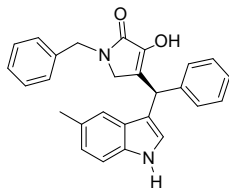

The title compound was prepared according to the general working procedure (12h) and purified by column chromatography (DCM/MeOH=100/1) to give the product as a white solid 33.0 mg, 81% yield; mp=182-187 °C; [α]<sub>D</sub><sup>20</sup> +27.7 (c = 0.3, CH<sub>2</sub>Cl<sub>2</sub>, 87% ee); HPLC: Daicel Chiralpak AD-H, hexane: 2-propanol = 60:40, flow rate = 1.0 mL/min, T = 23°C, UV = 254 nm, t<sub>R</sub> =23.6 min (major), t<sub>R</sub> =17.0min (minor); <sup>1</sup>H NMR (500 MHz, DMSO) δ 10.74 (s, 1H), 9.50 (s, 1H), 7.31 – 7.17 (m, 10H), 7.14 – 7.09 (m, 3H), 7.00 (d, J = 8.1 Hz, 1H), 6.85 (d, J = 1.7 Hz, 1H), 6.70 (d, J = 8.0 Hz, 1H), 5.55 (s, 1H), 4.60 – 4.45 (m, 2H), 3.59 (q, J = 18.4 Hz, 2H), 2.34 (s, 3H). <sup>13</sup>C NMR (126 MHz, DMSO) δ 167.3, 142.9, 142.5, 138.2, 137.4, 130.6, 129.1, 128.8, 128.5, 127.7, 127.7, 126.7, 124.8, 123.5, 123.2, 120.7, 118.8, 115.4, 111.8, 48.1, 45.9, 39.1, 21.8. HRMS (ESI TOF) m/z: [M+Na]<sup>+</sup> calcd for C<sub>27</sub>H<sub>25</sub>N<sub>2</sub>O<sub>2</sub> 409.1911 found 409.1911.

**(S)-1-benzyl-3-hydroxy-4-((5-methoxy-1H-indol-3-yl)(phenyl)methyl)-1,5-dihydro-2H-pyrrol-2-one (3p).**

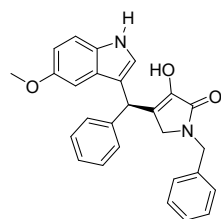

The title compound was prepared according to the general working procedure (6h) and purified by column chromatography (DCM/MeOH= 100/1) to give the product as a white solid 35.6 mg, 84 % yield; mp =93-98°C; [α]<sub>D</sub><sup>20</sup> +4.5 (c = 1.0, CH<sub>2</sub>Cl<sub>2</sub>, 99% ee); HPLC: Daicel Chiralpak AD-H, hexane: 2-propanol = 60:40, flow rate = 1.0 mL/min, T = 23°C, UV = 254 nm, t<sub>R</sub> =5.0 min (major), t<sub>R</sub> =6.3 min

(minor). <sup>1</sup>H NMR (500 MHz, DMSO) δ 10.76 (d, *J* = 1.8 Hz, 1H), 9.53 (s, 1H), 7.29 – 7.26 (m, 7H), 7.24 – 7.19 (m, 4H), 7.12 (d, *J* = 7.1 Hz, 3H), 6.90 (d, *J* = 2.0 Hz, 1H), 6.70 (dd, *J* = 8.7, 2.4 Hz, 1H), 6.62 (d, *J* = 2.3 Hz, 1H), 5.52 (s, 1H), 4.51 (q, *J* = 15.3 Hz, 2H), 3.61 (d, *J* = 8.3 Hz, 1H), 3.59 (s, 3H), 3.57 (d, *J* = 7.0 Hz, 1H). <sup>13</sup>C NMR (126 MHz, DMSO) δ 167.3, 161.2, 153.3, 152.6, 142.7, 142.5, 138.2, 132.1, 129.1, 128.8, 128.5, 128.0, 127.7, 127.7, 127.2, 126.8, 124.5, 123.4, 115.3, 112.7, 111.4, 101.0, 55.6, 48.1, 45.9, 39.0. HRMS (ESI TOF) *m/z*: [M+Na]<sup>+</sup> calcd for C<sub>27</sub>H<sub>24</sub>N<sub>2</sub>NaO<sub>3</sub> 447.1679 found 447.1684.

**(S)-1-benzyl-4-((5-fluoro-1H-indol-3-yl)(phenyl)methyl)-3-hydroxy-1,5-dihydro-2H-pyrrol-2-one (3q)**

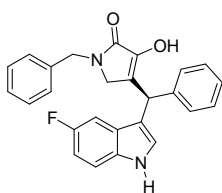

The title compound was prepared according to the general working procedure (10h) and purified by column chromatography (DCM/MeOH= 100/1) to give the product as a white solid 35.4 mg, 86% yield; mp =224-229 °C; [α]<sub>D</sub><sup>20</sup> +7.7 (*c* = 1.0, CH<sub>2</sub>Cl<sub>2</sub>, 81% ee); HPLC: Daicel Chiralpak AD-H, hexane:2- propanol = 60:40, flow rate = 1.0 mL/min, T=23°C, UV = 254 nm, *t<sub>R</sub>*=3.9 min (major), *t<sub>R</sub>* =6.5 min (minor). <sup>1</sup>H NMR (500 MHz, DMSO) δ 10.93 (s, 1H), 9.55 (s, 1H), 7.37 – 7.08 (m, 14H), 7.03 (t, *J* = 7.5 Hz, 1H), 6.95 (s, 1H), 6.87 (t, *J* = 7.4 Hz, 1H), 5.58 (s, 1H), 4.50 (s, 2H), 3.60 (dd, *J* = 39.9, 18.4 Hz, 2H). 27.69 (d, *J* = 5.8 Hz), 127.04 (d, *J* = 10.0 Hz), 113.04 (d, *J* = 9.8 Hz), 109.72 (d, *J* = 26.0 Hz), 103.62 (d, *J* = 23.2 Hz). <sup>13</sup>C NMR (126 MHz, DMSO) δ 167.3, 157.9, 156.1 (s, <sup>1</sup>*J*<sub>CF</sub> =317 Hz) 142.6, 142.5 (d, <sup>3</sup>*J*<sub>CF</sub> = 18.3 Hz), 138.2, 133.6, 129.1, 128.9, 128.5, 128.0, 127.7 (d, <sup>4</sup>*J*<sub>CF</sub> = 5.8 Hz), 127.1, 127.0 (d, <sup>3</sup>*J*<sub>CF</sub> = 10.0 Hz), 126.9, 126.0, 123.0, 115.8, 115.8, 113.1, 113.0 (d, <sup>4</sup>*J*<sub>CF</sub> = 9.8 Hz), 109.8 (d, <sup>2</sup>*J*<sub>CF</sub> = 26.0 Hz), 109.6, 103.7, 103.5, (d, <sup>2</sup>*J*<sub>CF</sub> = 23.2 Hz). 48.1, 46.0, 39.0. <sup>19</sup>F NMR (471 MHz, DMSO) δ -125.1. HRMS (ESI TOF) *m/z*: [M+H]<sup>+</sup> calcd for C<sub>26</sub>H<sub>22</sub>FN<sub>2</sub>O<sub>2</sub> 413.1660 found 413.1666.

**(S)-1-benzyl-4-((5-chloro-1H-indol-3-yl)(phenyl)methyl)-3-hydroxy-1,5-dihydro-2H-pyrrol-2-one (3r)**

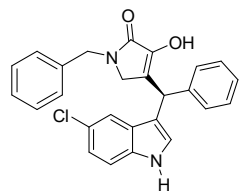

The title compound was prepared according to the general working procedure (10h) and purified by column chromatography (DCM/MeOH= 100/1) to give the product as a white solid 34.2 mg, 80% yield; mp=215-220 °C; [α]<sub>D</sub><sup>20</sup> +56.6 (*c* = 0.3, CH<sub>2</sub>Cl<sub>2</sub>, 87% ee); HPLC: Daicel Chiralpak AD-H, hexane: 2-propanol = 60:40, flow rate = 1.0 mL/min, T = 23°C, UV = 254 nm, *t<sub>R</sub>* = 17.3 min (major), *t<sub>R</sub>* =14.4 min (minor). <sup>1</sup>H NMR (500 MHz, DMSO) δ 11.15 (s, 1H), 9.57 (s, 1H), 7.37 (d, *J* = 8.5 Hz, 1H), 7.34 – 7.18 (m, 10H), 7.18 – 7.09 (m, 2H), 7.05 (d, *J* = 7.1 Hz, 1H), 5.56 (s, 1H), 4.62 – 4.42 (m, 2H), 3.61 (dd, *J* = 41.9, 18.4 Hz, 2H). <sup>13</sup>C NMR (126 MHz, DMSO) δ 167.3, 142.7, 142.4, 138.1, 135.4, 129.1, 128.9, 128.7, 128.5, 128.1, 128.0, 127.7, 126.9, 125.7, 124.0, 122.9, 121.6, 118.2, 115.5, 113.6, 48.1, 46.0, 38.9. HRMS (ESI TOF) *m/z*: [M+Na]<sup>+</sup> calcd for C<sub>26</sub>H<sub>21</sub>ClN<sub>2</sub>NaO<sub>2</sub> 451.1184 found 451.1176.

**(S)-1-benzyl-4-((5-bromo-1H-indol-3-yl)(phenyl)methyl)-3-hydroxy-1,5-dihydro-2H-pyrrol-2-one (3s)**

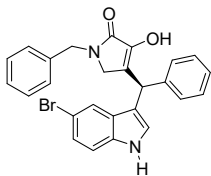

The title compound was prepared according to the general working procedure (10h) and purified by column chromatography (DCM/MeOH= 100/1) to give the product as a white solid 31.3mg, 81% yield; mp =240-245 °C;  $[\alpha]_D^{20}$  +6.7 (c = 0.3, CH<sub>2</sub>Cl<sub>2</sub>, 92% ee); HPLC: Daicel Chiralpak AD-H, hexane: 2-propanol = 60:40, flow rate = 1.0 mL/min, T = 23°C, UV = 254 nm,  $t_R$  =17.0 min (major),  $t_R$  =15.3 min (minor). <sup>1</sup>H NMR (500 MHz, DMSO)  $\delta$  11.16 (s, 1H), 9.57 (s, 1H), 7.35 – 7.20 (m, 10H), 7.18 – 7.11 (m, 3H), 7.04 (s, 1H), 5.55 (s, 1H), 4.58 – 4.46 (m, 2H), 3.60 (dd,  $J$  = 41.8, 18.4 Hz, 2H). <sup>13</sup>C NMR (126 MHz, DMSO)  $\delta$  167.3, 142.7, 142.4, 138.1, 135.6, 129.1, 128.9, 128.7, 128.5, 127.7, 126.9, 125.6, 124.1, 122.9, 121.2, 115.5, 114.1, 111.6, 48.1, 45.9, 38.9. HRMS (ESI TOF) m/z: [M+Na]<sup>+</sup> calcd for C<sub>26</sub>H<sub>21</sub>BrN<sub>2</sub>NaO<sub>2</sub> 495.0679 found 495.0688.

**(3R,4R)-4-((S)-(1H-indol-3-yl)(phenyl)methyl)-1-benzyl-3-hydroxypyrrolidin-2-one (4a)**

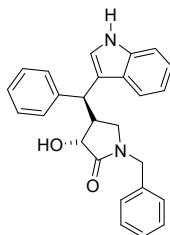

To a solution of pyrrolone **3a** (0.30 mmol) in DCM: CH<sub>3</sub>COOH (10:1, v/v, 6 mL), sodium borohydride (0.6 mmol) was added portion wise with stirring at 0°C. After the addition, the reaction mixture was allowed to stir at room temperature for 1 h. Then, a saturated aqueous solution of NaHCO<sub>3</sub> (6 mL) was added and extracted with DCM (3x10 mL). The combined organic layer was washed with brine, dried over anhydrous MgSO<sub>4</sub> and concentrated in vacuo. The resulting residue was purified by silica gel column chromatography (hexane/ethyl acetate) to get pure pyrrolidinone **4a** as a white solid 79.6 mg, 67% yield; mp = 189-193 °C;  $[\alpha]_D^{20}$  +11.7 (c = 1.0, CH<sub>2</sub>Cl<sub>2</sub>, 88% ee); HPLC: Daicel Chiralpak OD-H, hexane: 2-propanol = 60:40, flow rate = 1.0 mL/min, T = 23°C, UV = 254 nm,  $t_R$  =6.89 min (major),  $t_R$  =13.2 min (minor); <sup>1</sup>H NMR (500 MHz, DMSO)  $\delta$  10.94 (s, 1H), 9.55 (s, 1H), 7.37 – 7.22 (m, 10H), 7.22 – 7.18 (m, 1H), 7.13 (t,  $J$  = 9.0 Hz, 3H), 7.04 (t,  $J$  = 7.6 Hz, 1H), 6.95 (d,  $J$  = 1.7 Hz, 1H), 6.87 (t,  $J$  = 7.4 Hz, 1H), 5.57 (s, 1H), 4.51 (s, 2H), 3.83 (s, 1H), 3.64 (d,  $J$  = 18.5 Hz, 1H), 3.56 (d,  $J$  = 18.5 Hz, 1H). <sup>13</sup>C NMR (126 MHz, DMSO)  $\delta$  167.3, 142.8, 142.5, 138.2, 136.9, 129.1, 128.8, 128.5, 127.7, 127.7, 126.9, 126.8, 123.8, 123.5, 121.6, 119.1, 118.9, 115.5, 112.0, 55.4, 48.1, 45.9, 39.0. HRMS (ESI TOF) m/z: [M+Na]<sup>+</sup> calcd for C<sub>26</sub>H<sub>24</sub>N<sub>2</sub>NaO<sub>2</sub> 419.1730; found 417.1726.

### Part 3 : $^1\text{H}$ NMR, $^{19}\text{F}$ NMR & $^{13}\text{C}$ NMR

#### $^1\text{H}$ NMR and $^{13}\text{C}$ NMR of **3a**

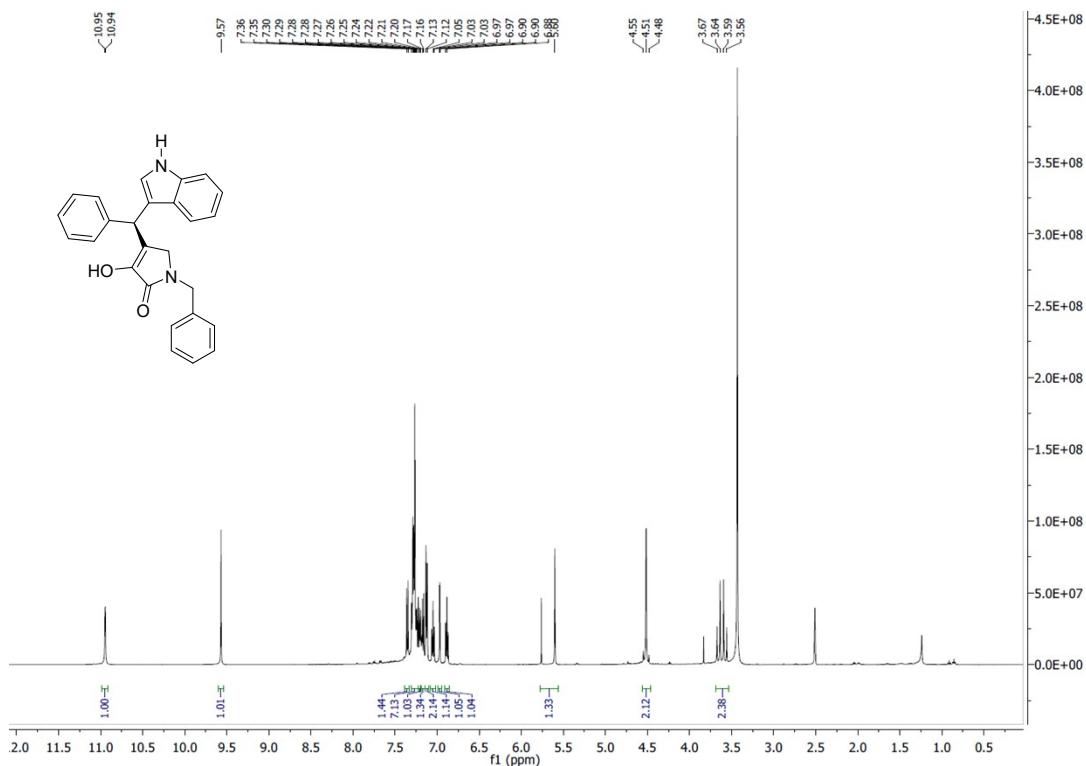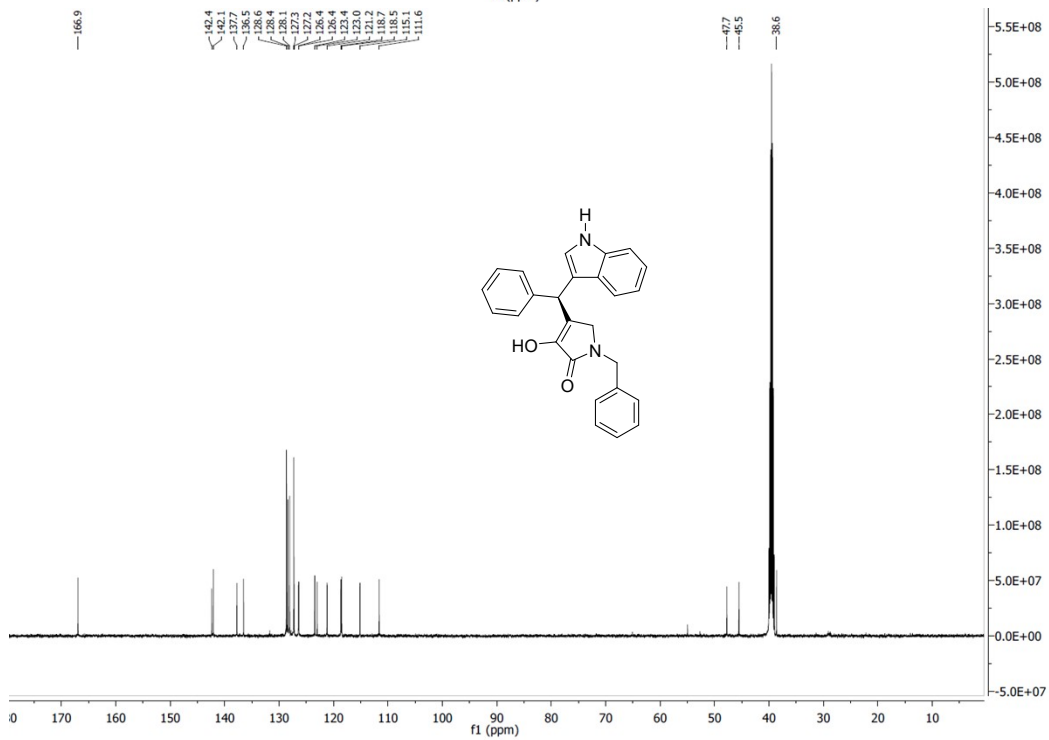

# $^1\text{H}$ NMR and $^{13}\text{C}$ NMR of **3b**

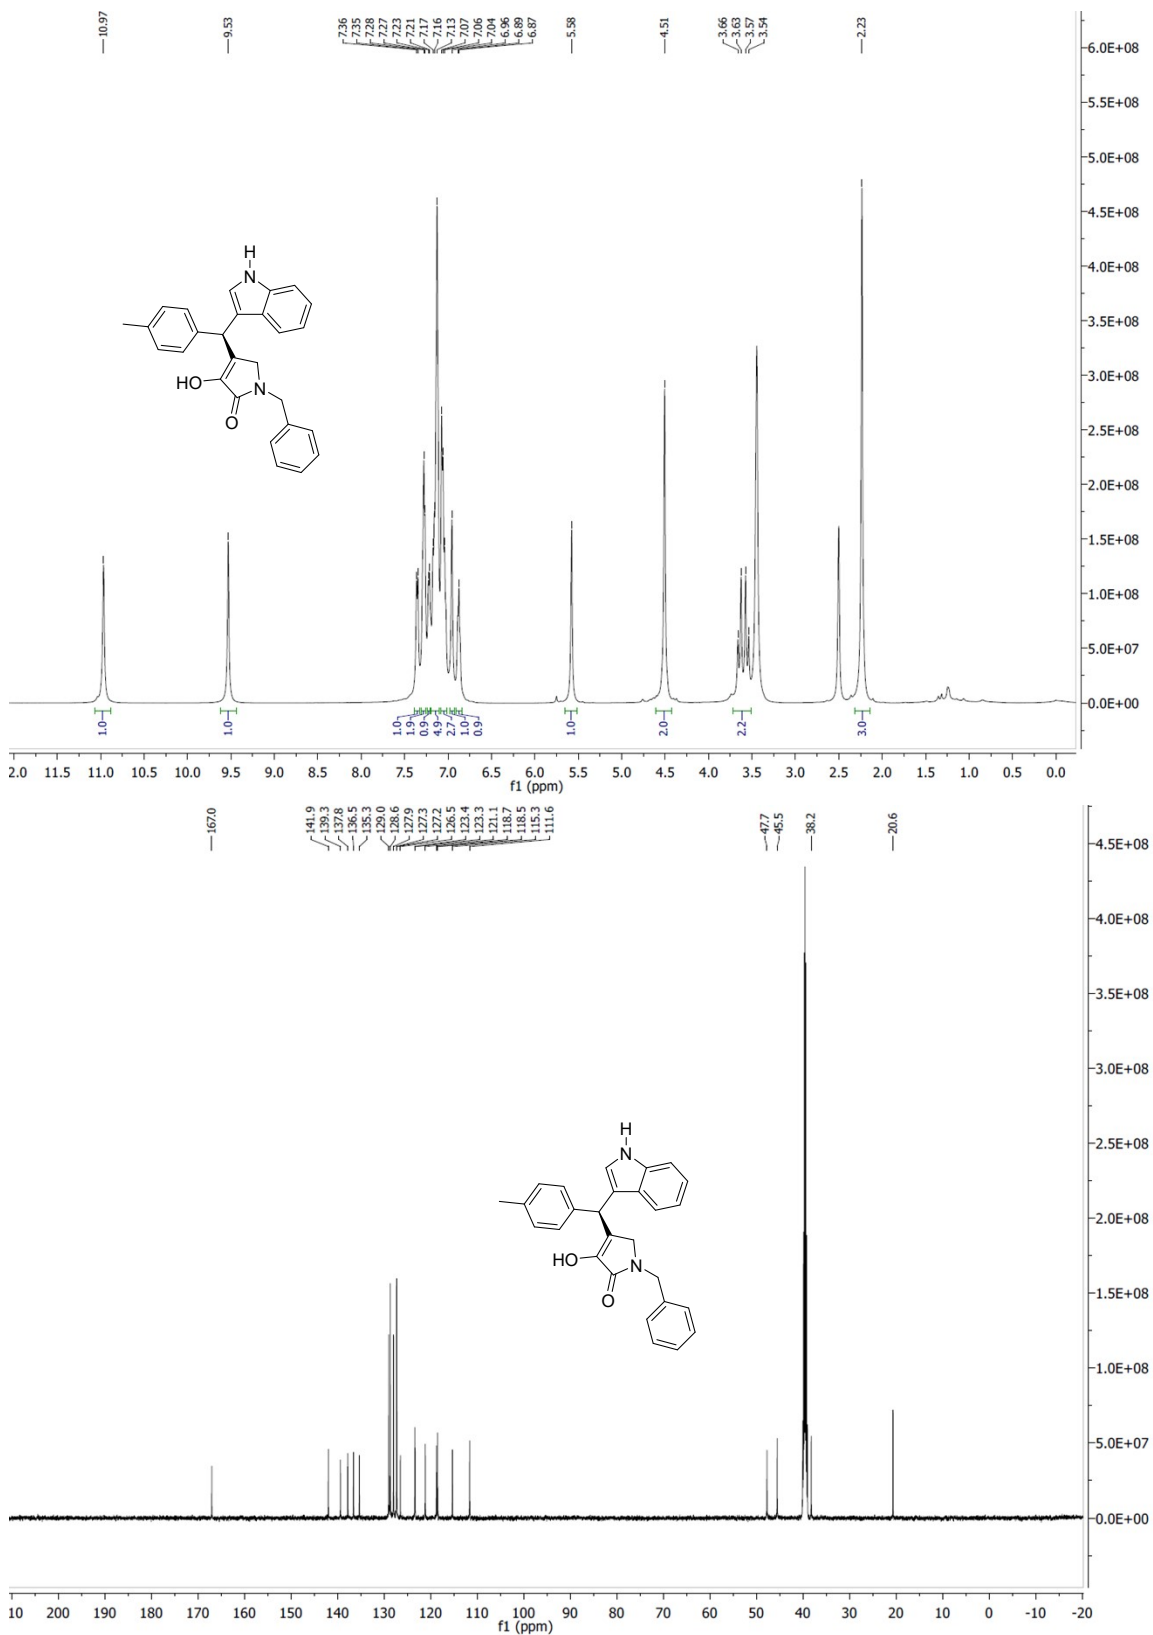

# $^1\text{H}$ NMR and $^{13}\text{C}$ NMR of **3c**

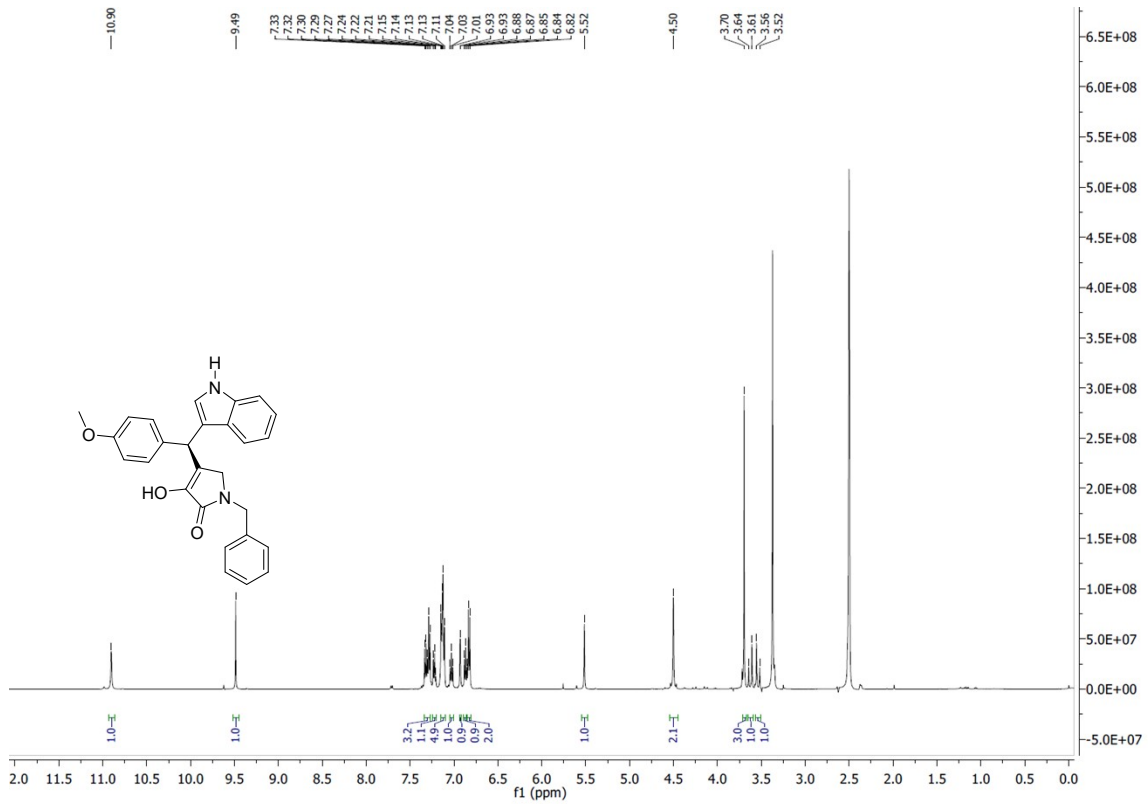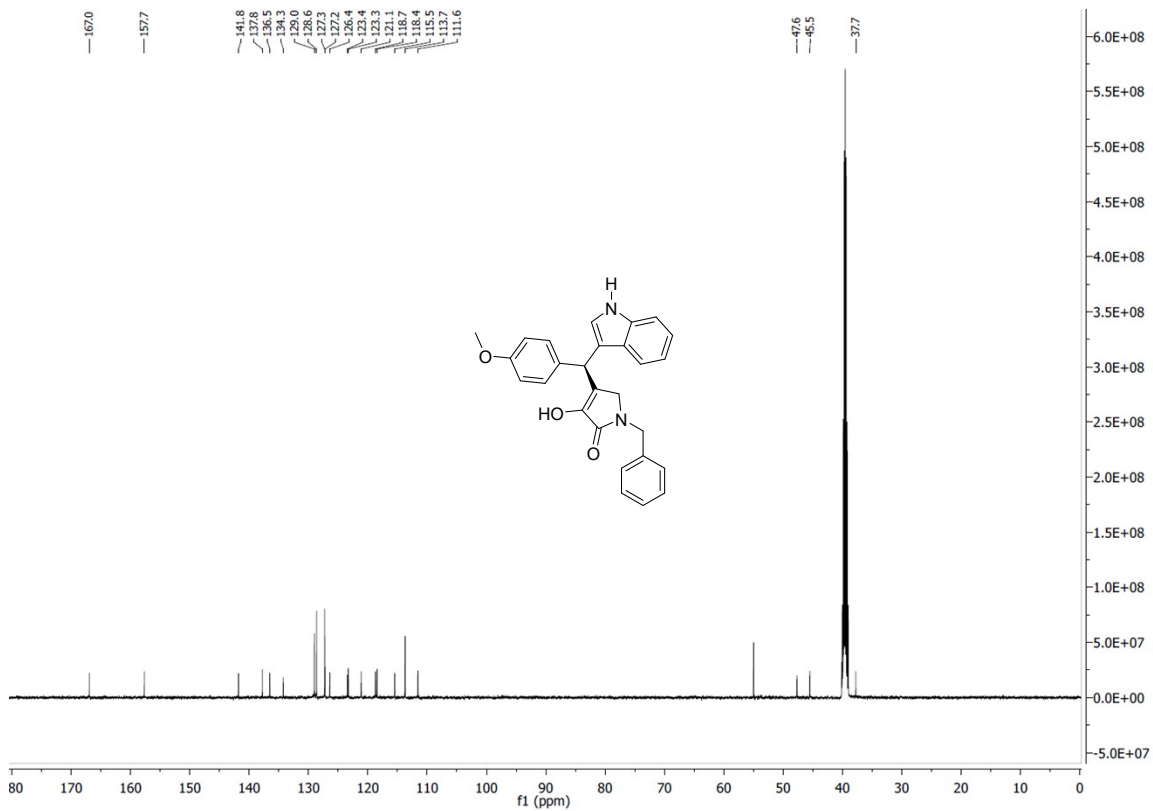



<sup>1</sup>H NMR and <sup>13</sup>C NMR of **3d**

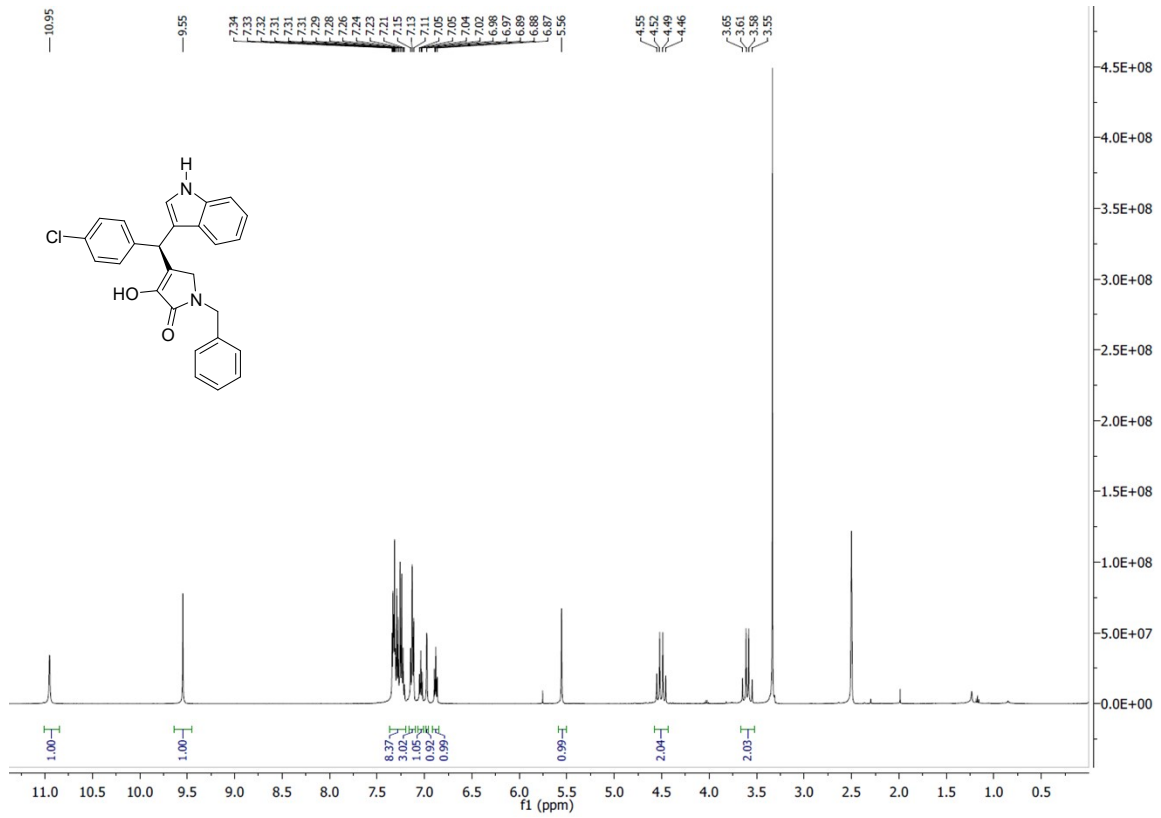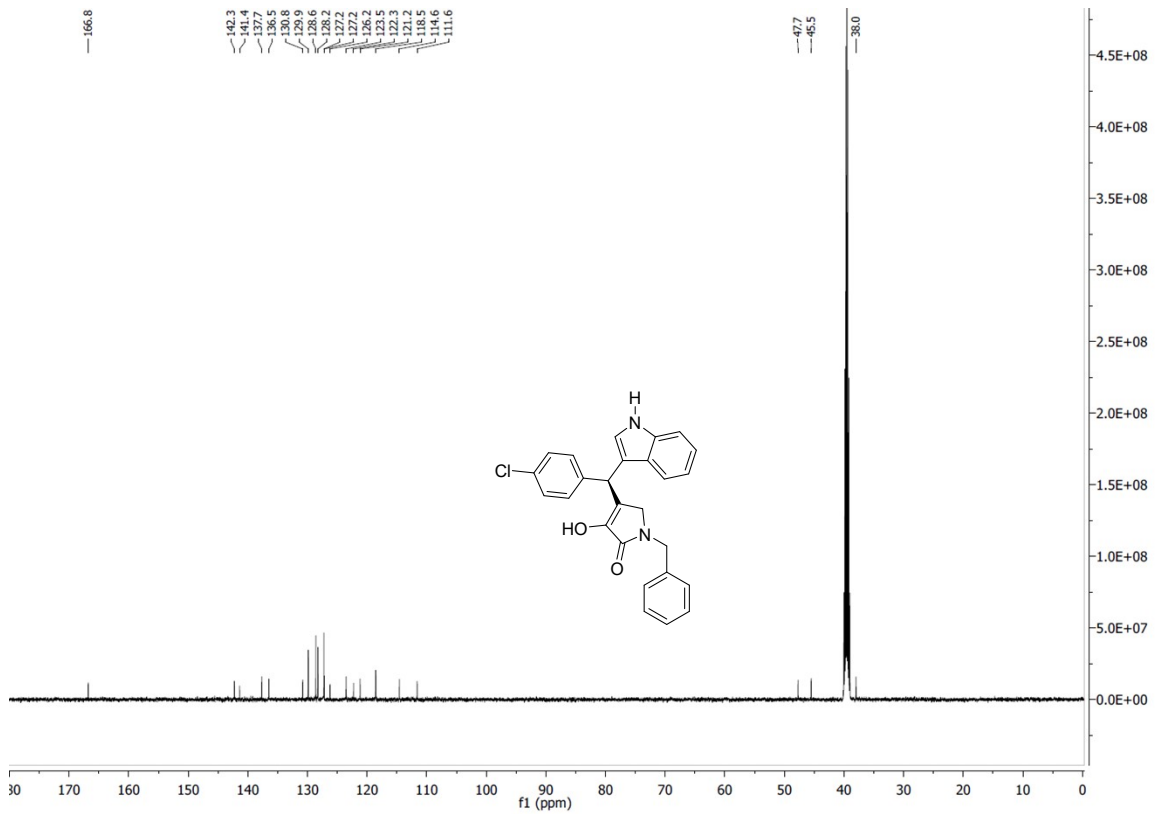

# $^1\text{H}$ NMR and $^{13}\text{C}$ NMR of **3e**

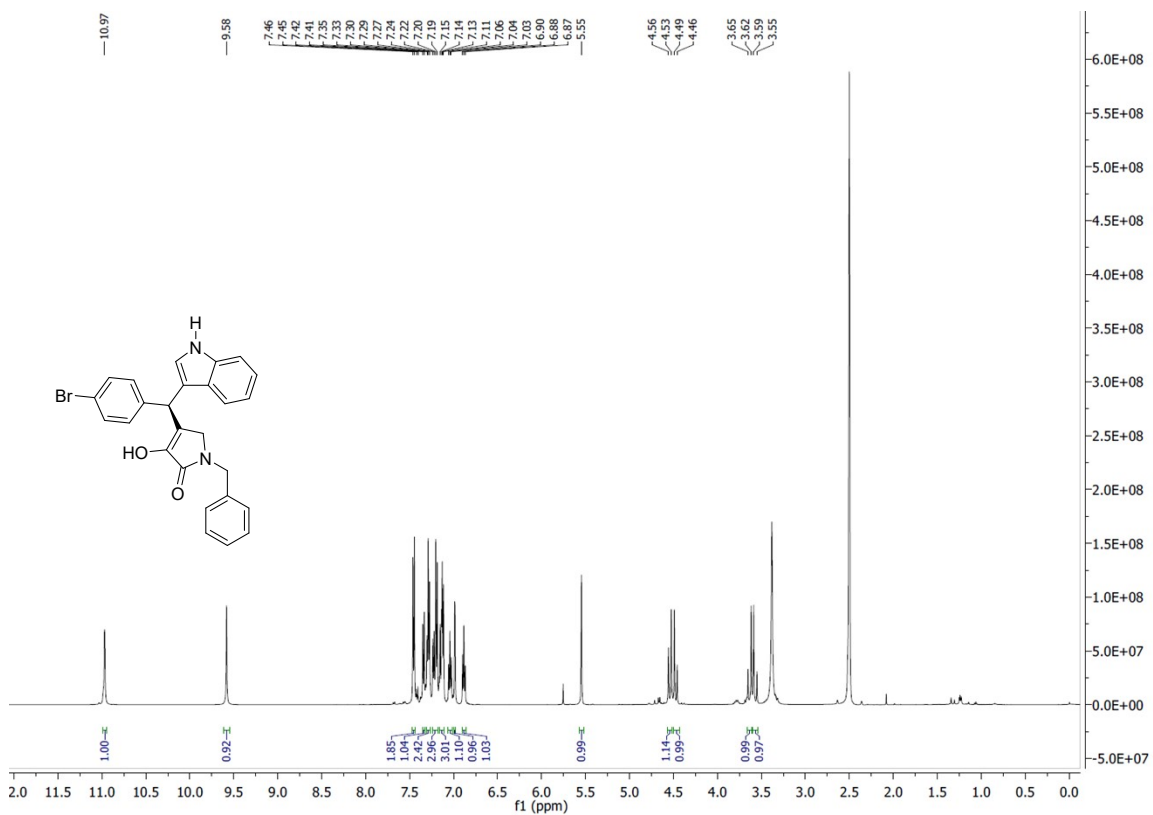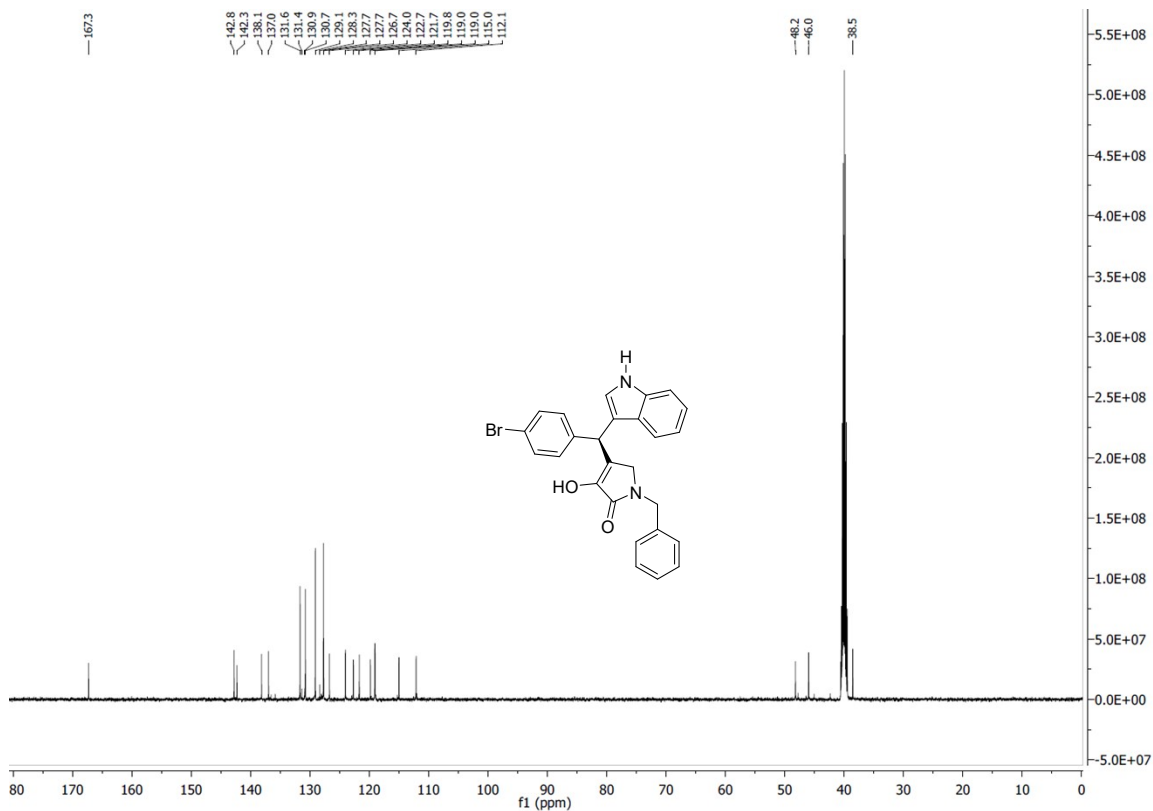

<sup>1</sup>H NMR and <sup>13</sup>C NMR of **3f**

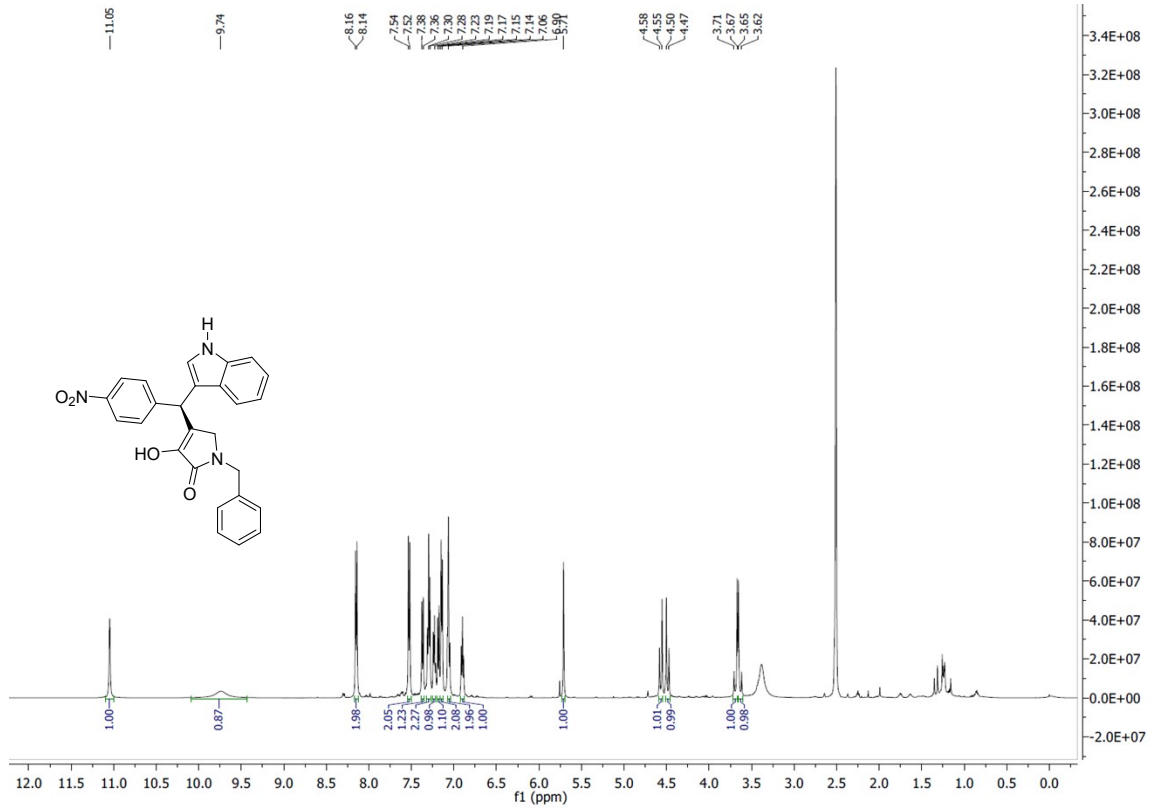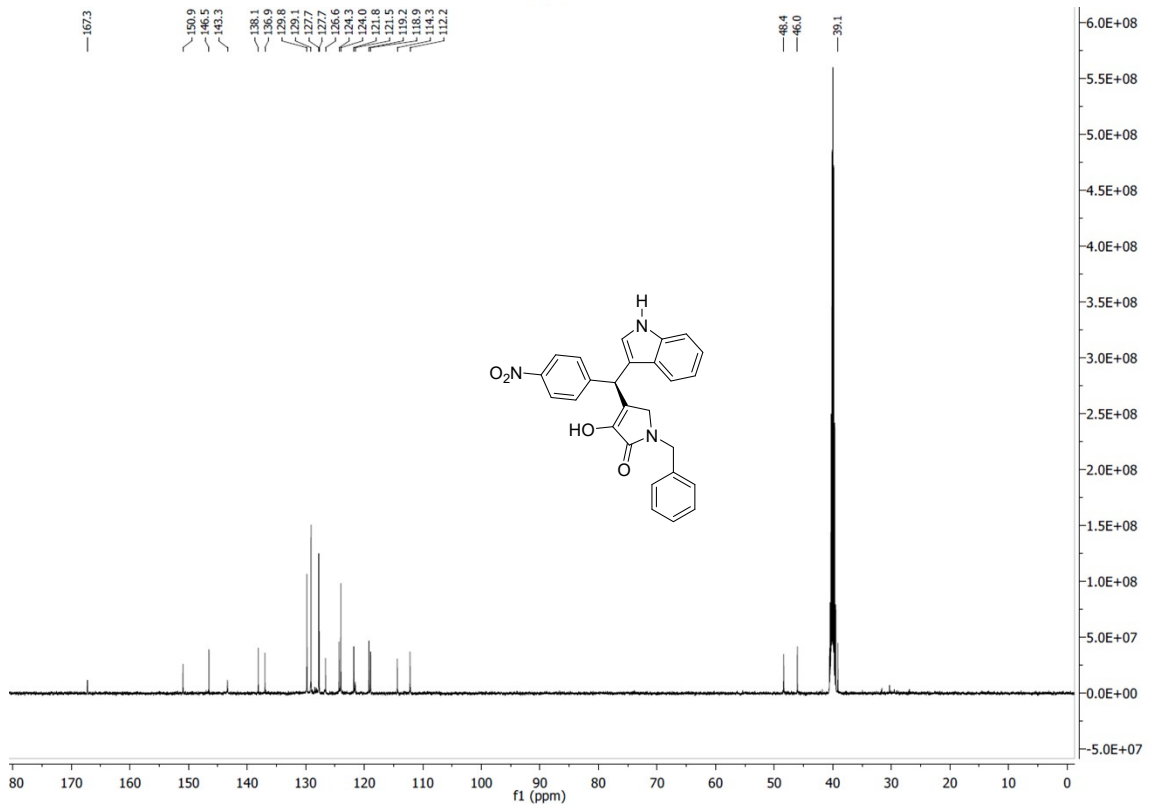

$^1\text{H}$  NMR and  $^{13}\text{C}$  NMR of **3g**

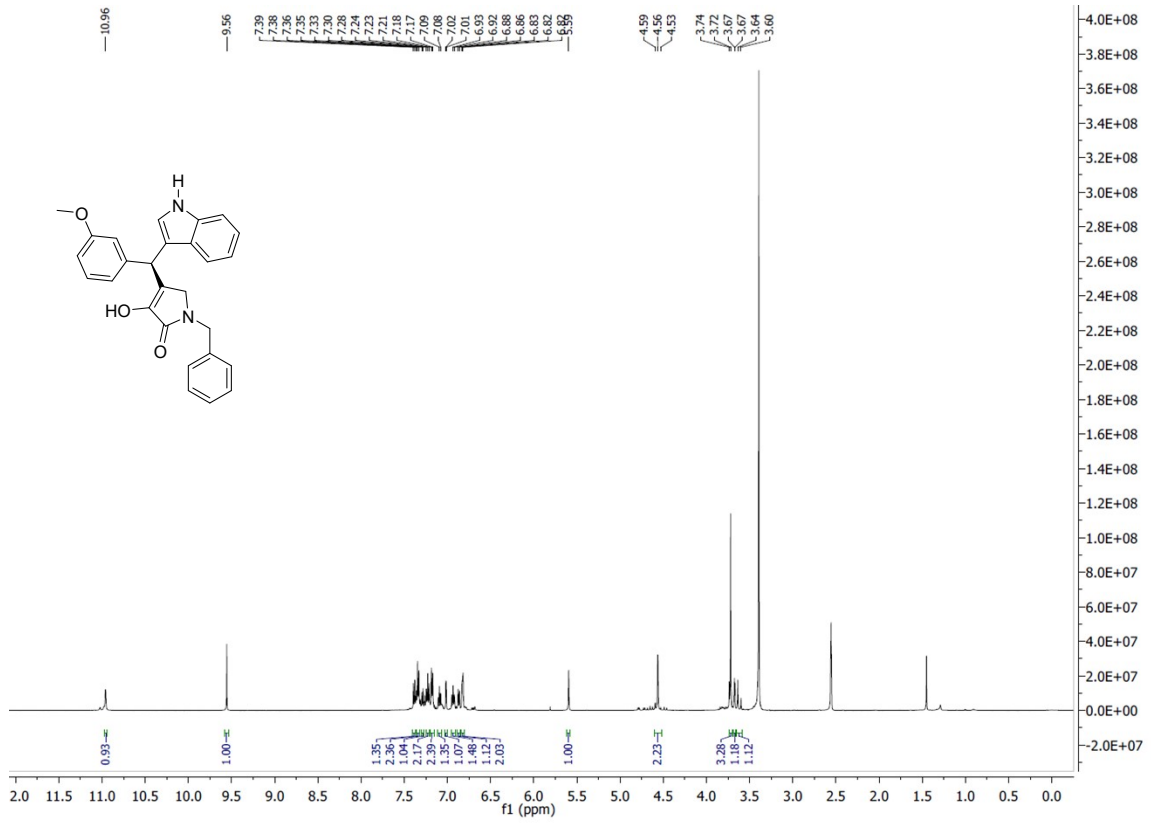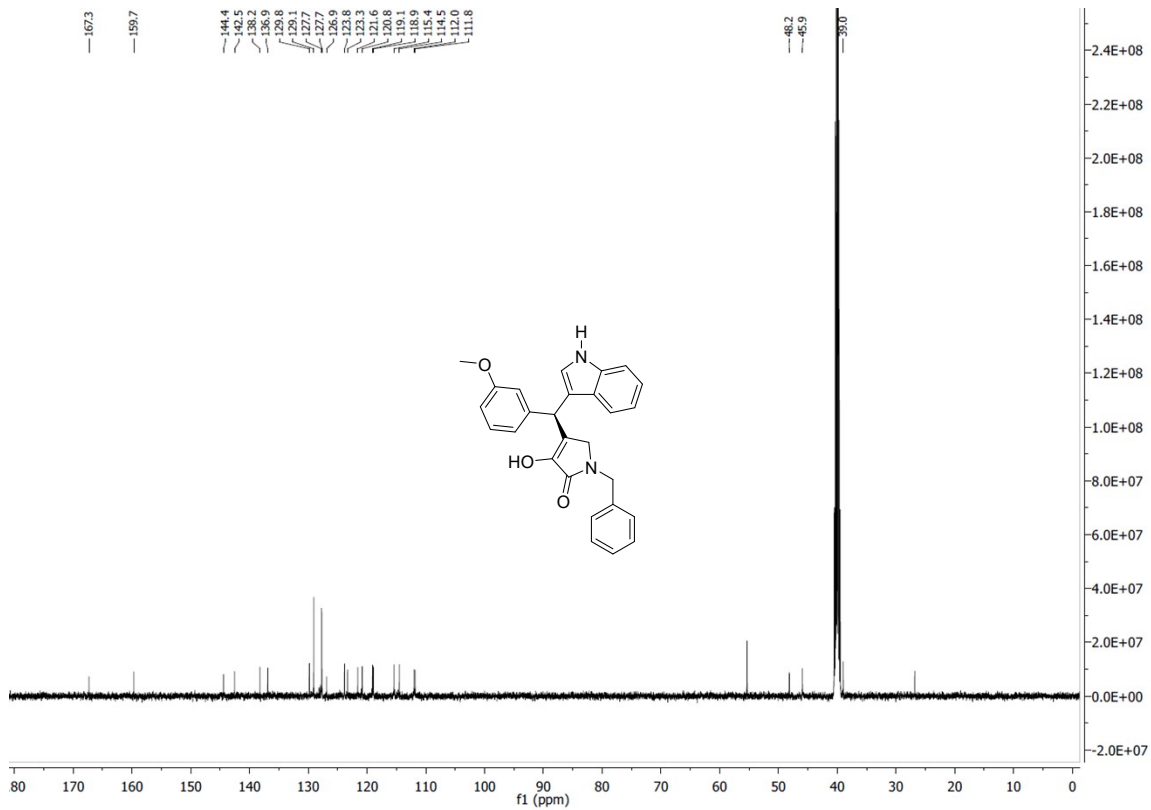

<sup>1</sup>H NMR and <sup>13</sup>C NMR of 3h

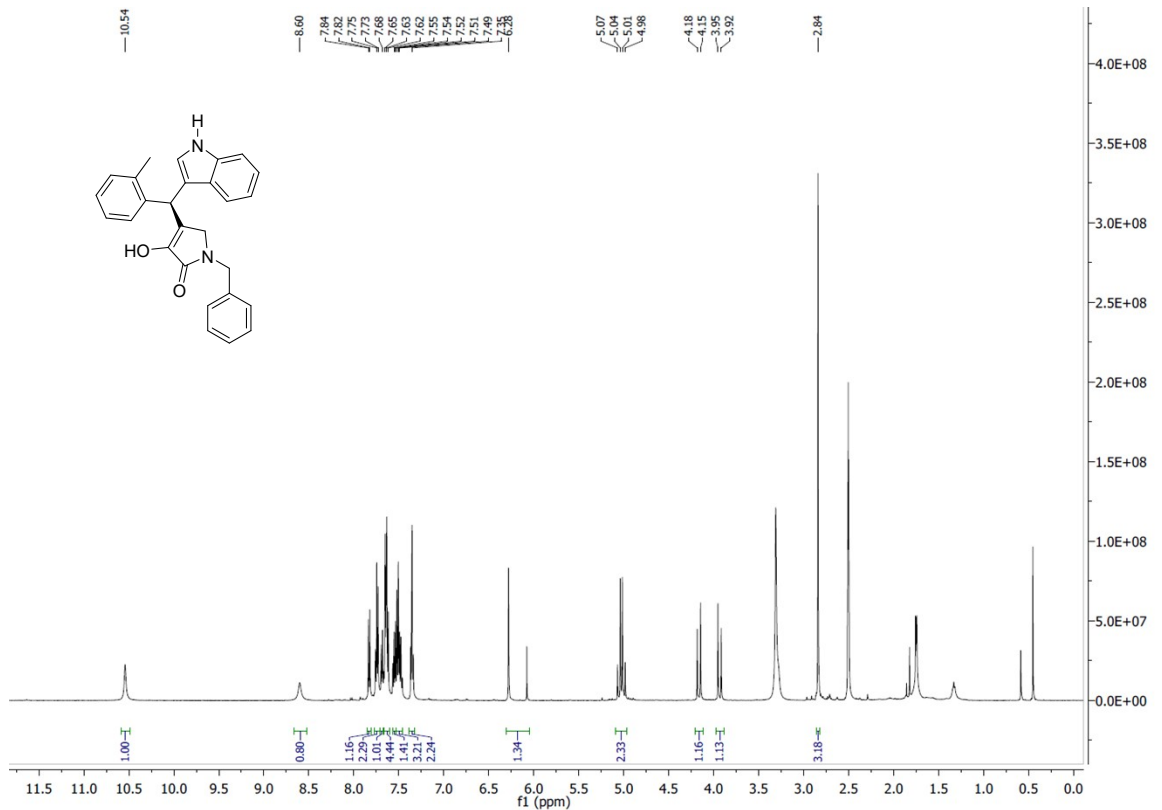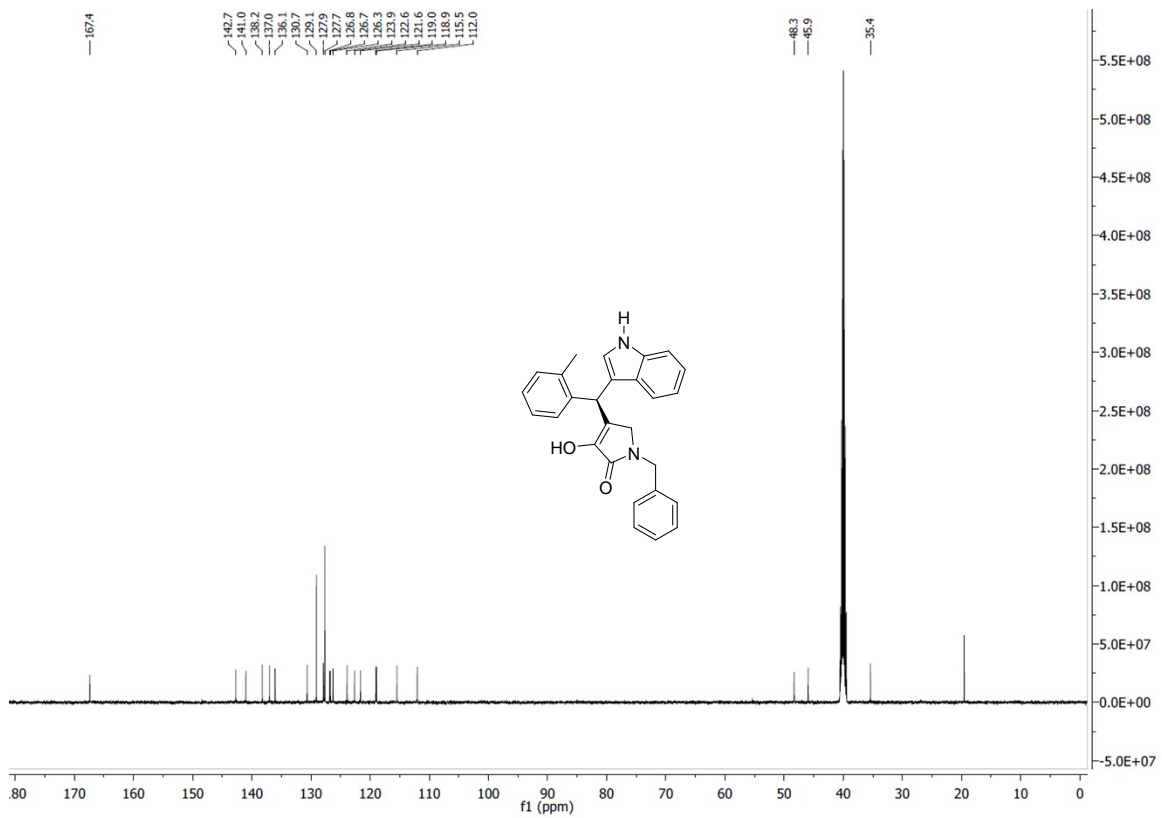

<sup>1</sup>H NMR and <sup>13</sup>C NMR of **3i**

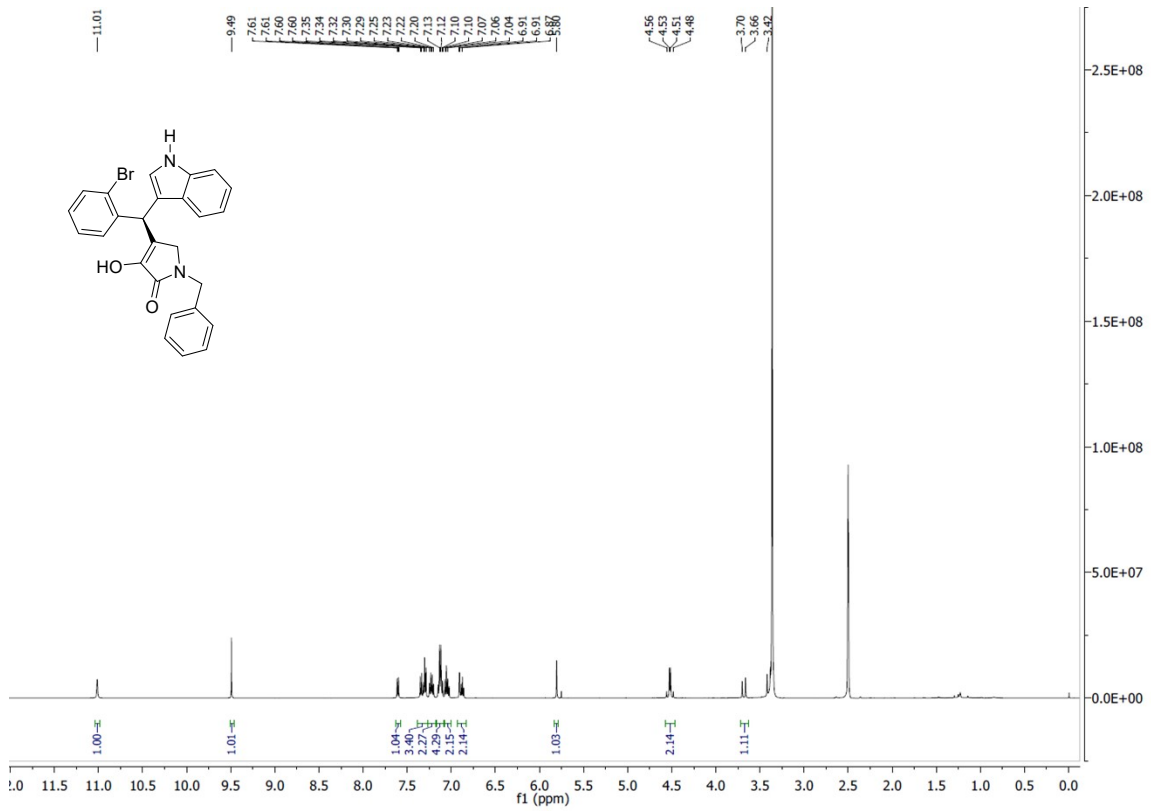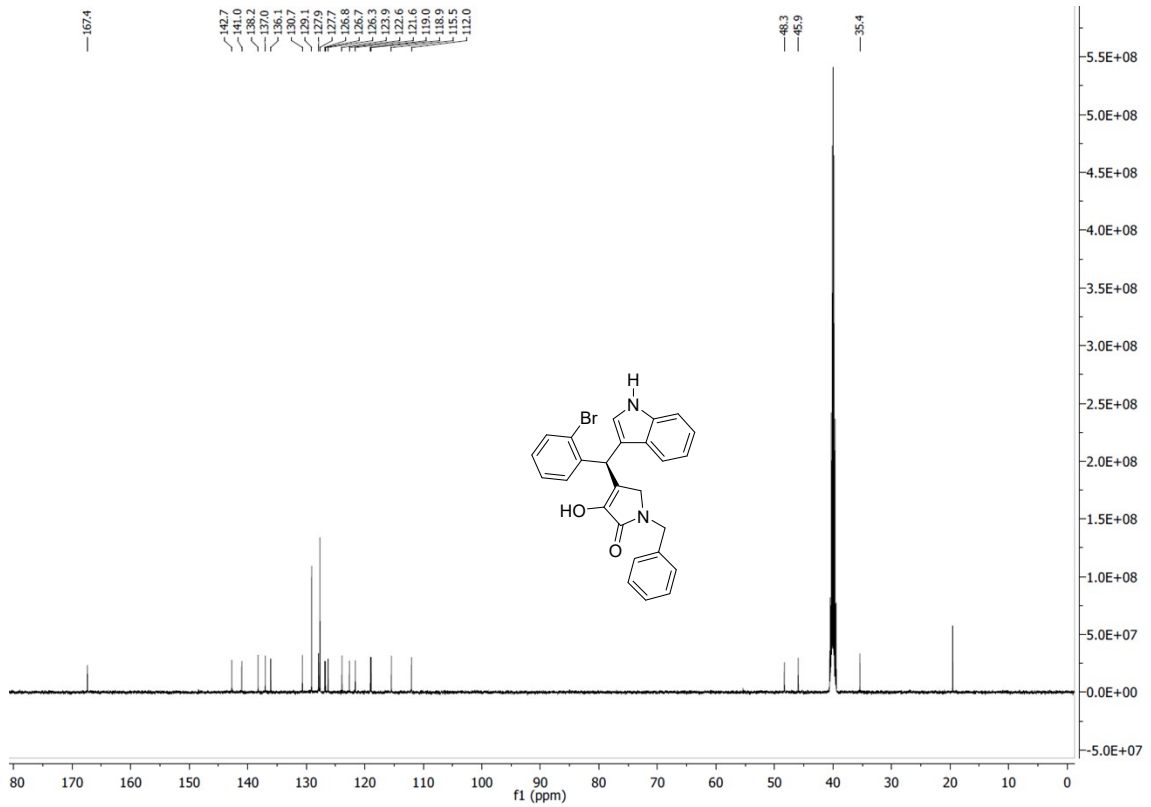

<sup>1</sup>H NMR and <sup>13</sup>C NMR of **3j**

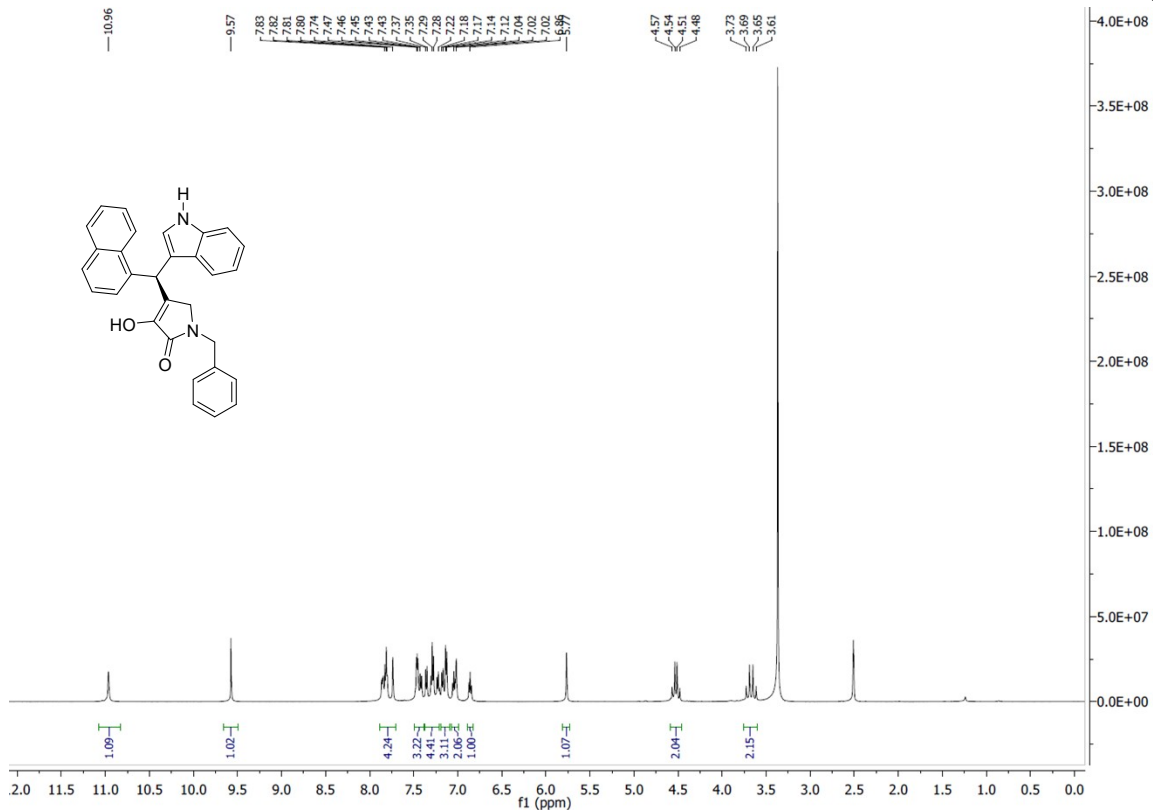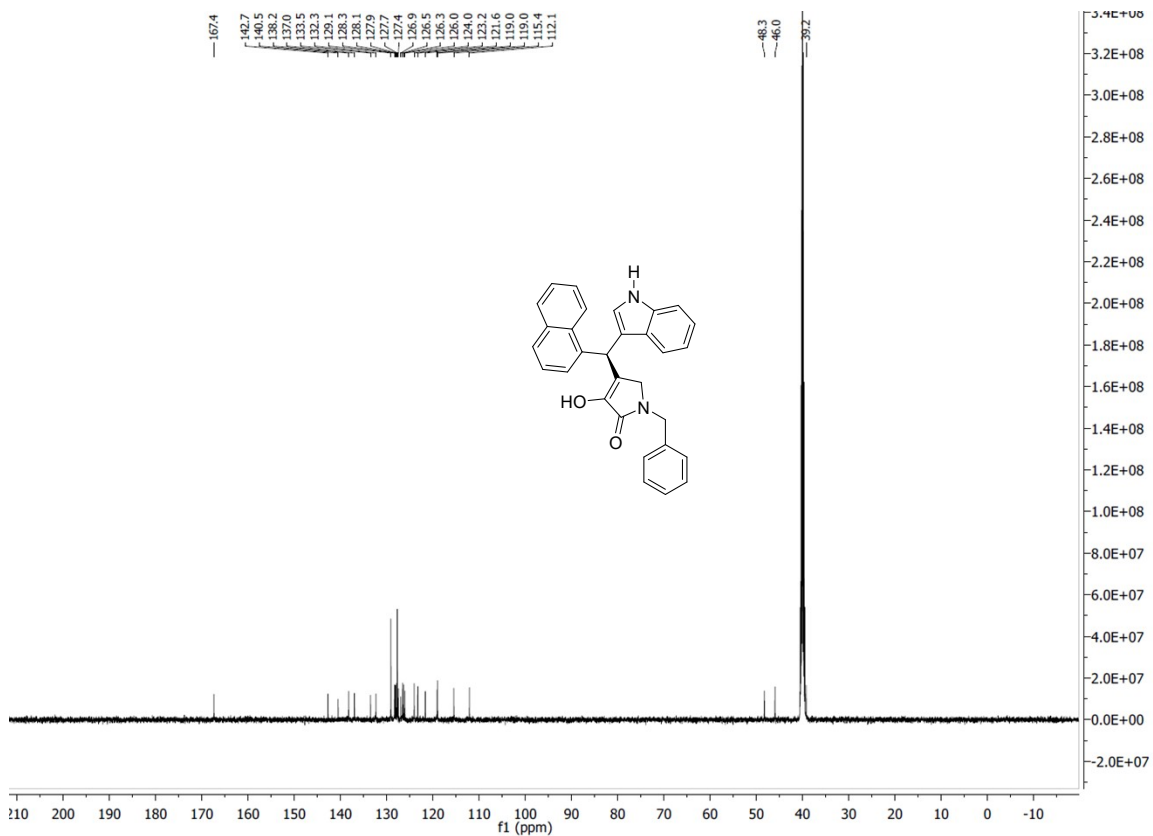

<sup>1</sup>H NMR and <sup>13</sup>C NMR of **3k**

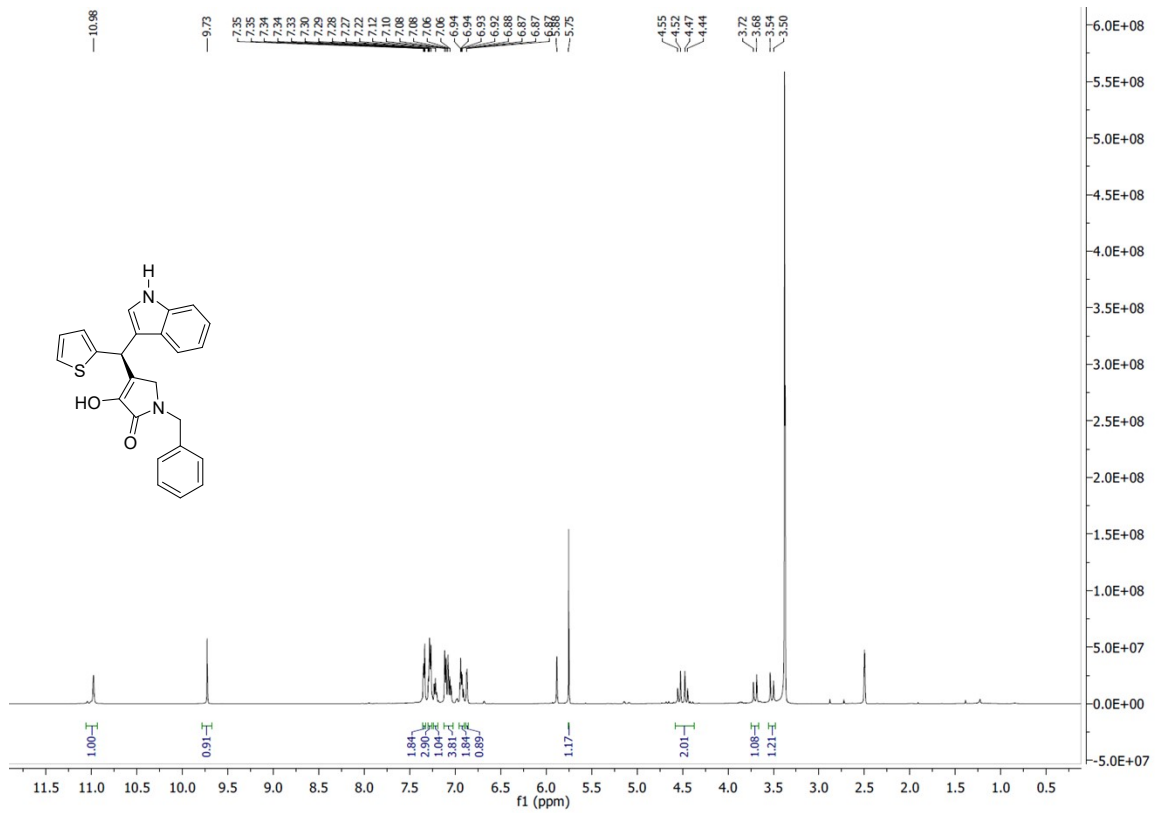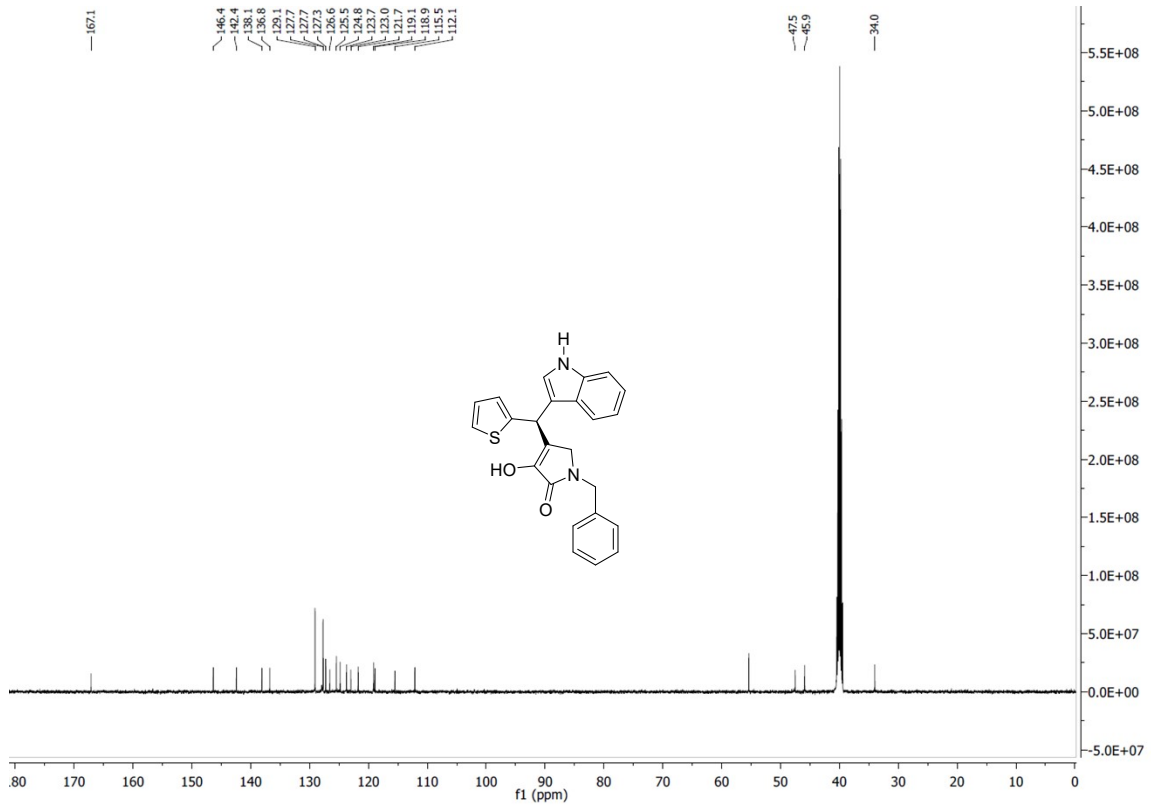



# <sup>1</sup>H NMR and <sup>13</sup>C NMR of **31**

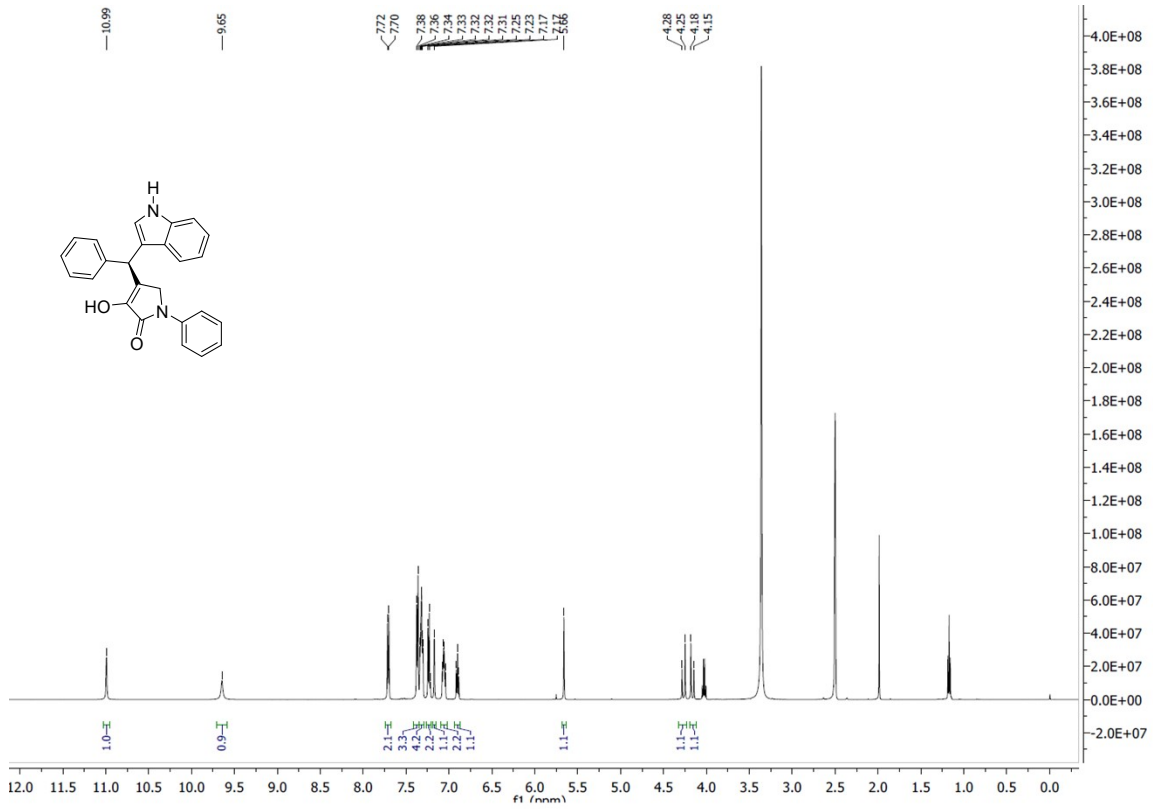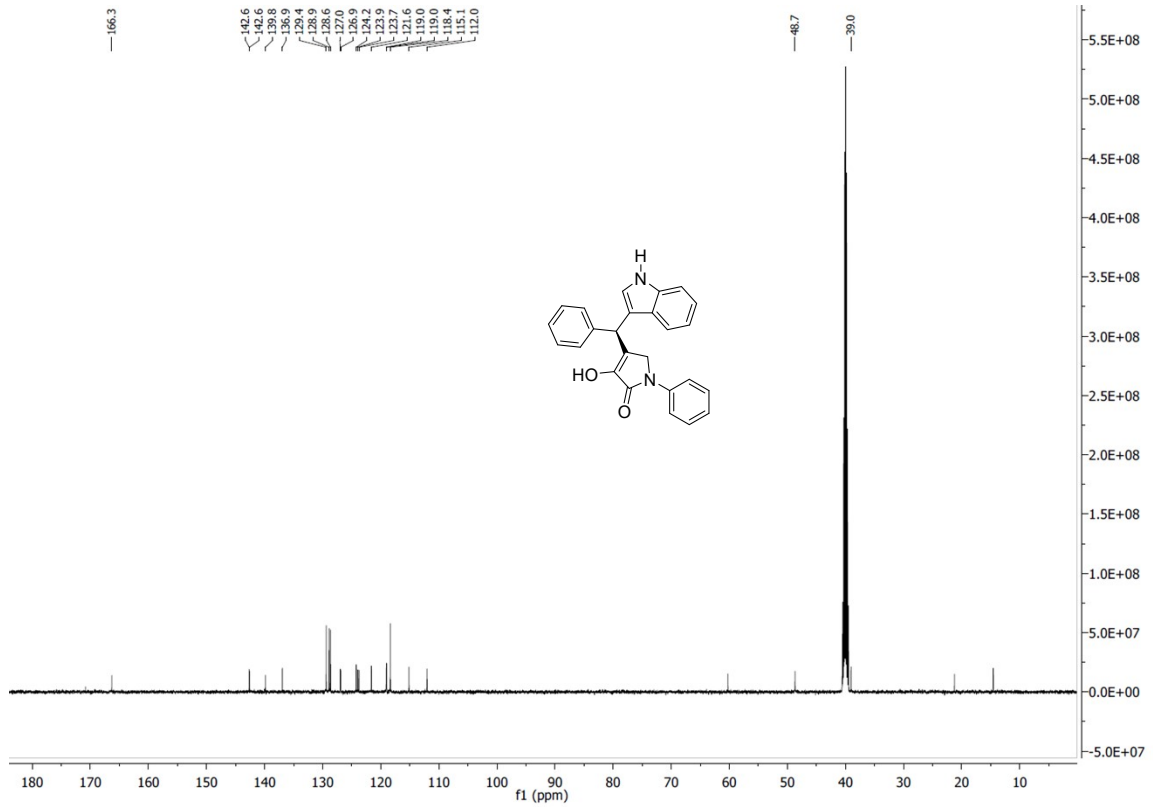

<sup>1</sup>H NMR and <sup>13</sup>C NMR of 3m

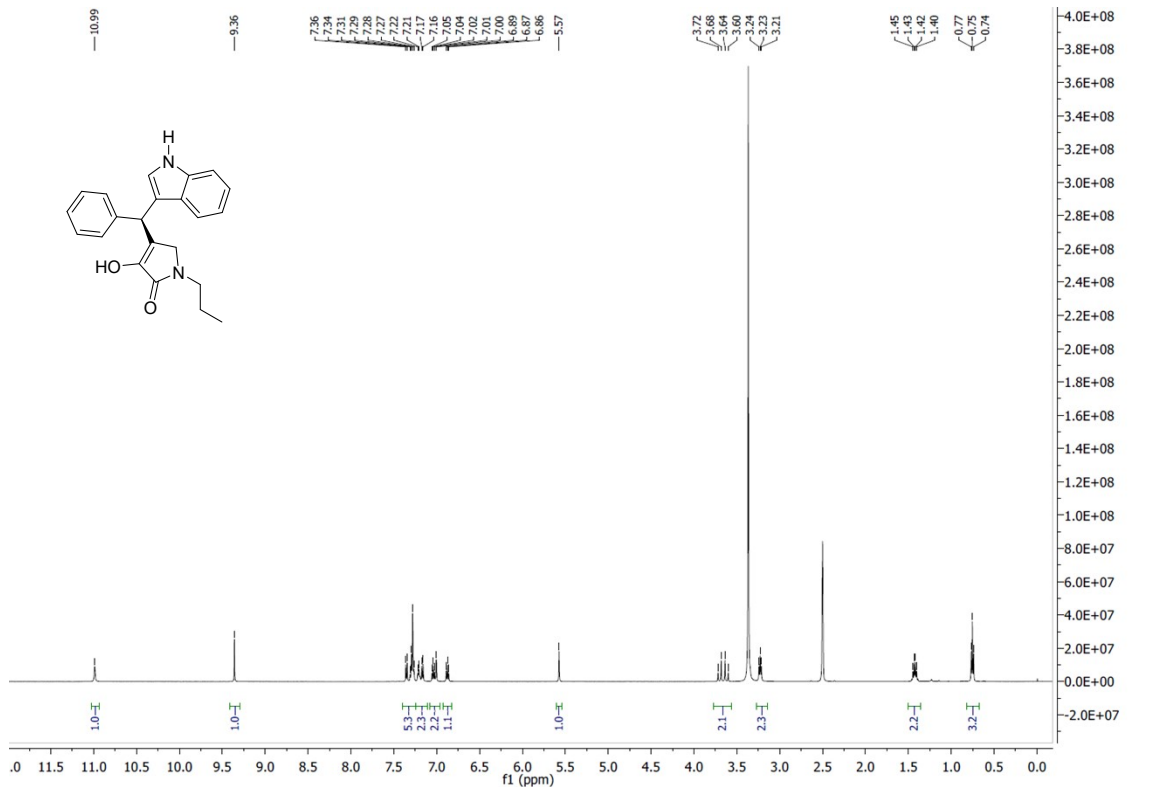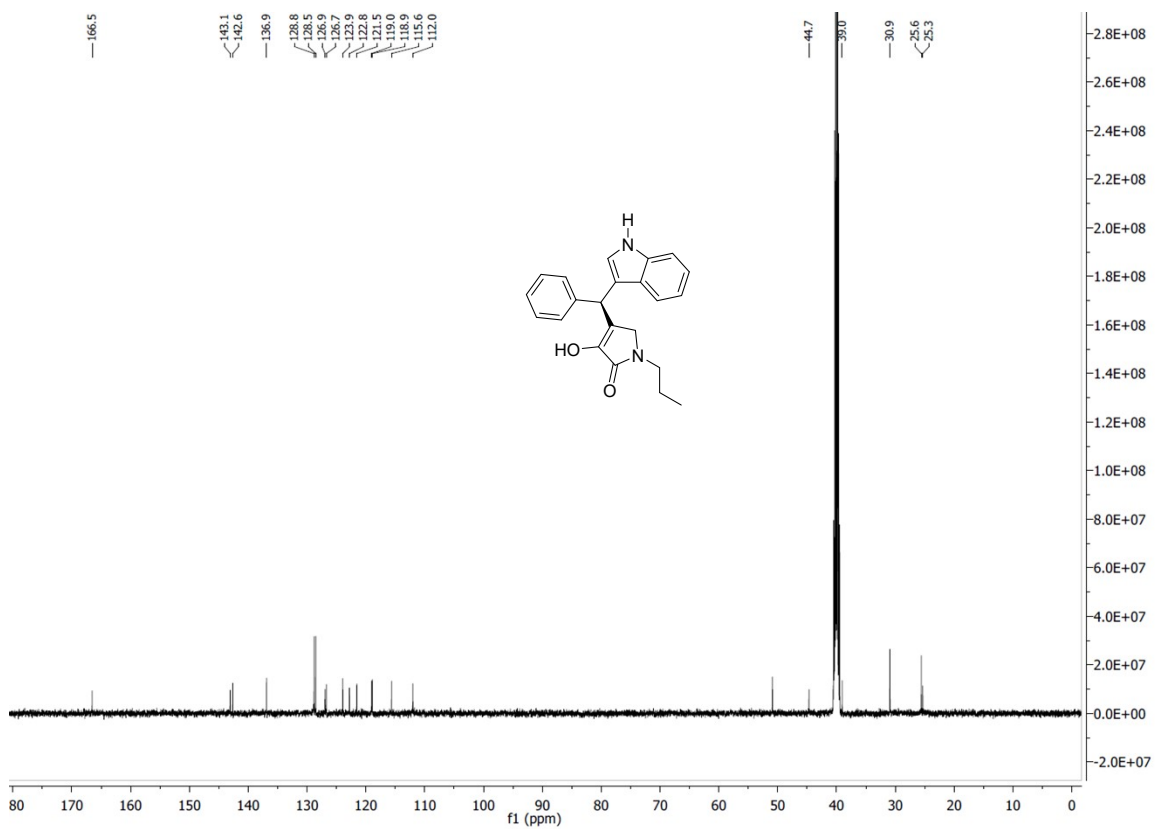

# $^1\text{H}$ NMR and $^{13}\text{C}$ NMR of **3n**

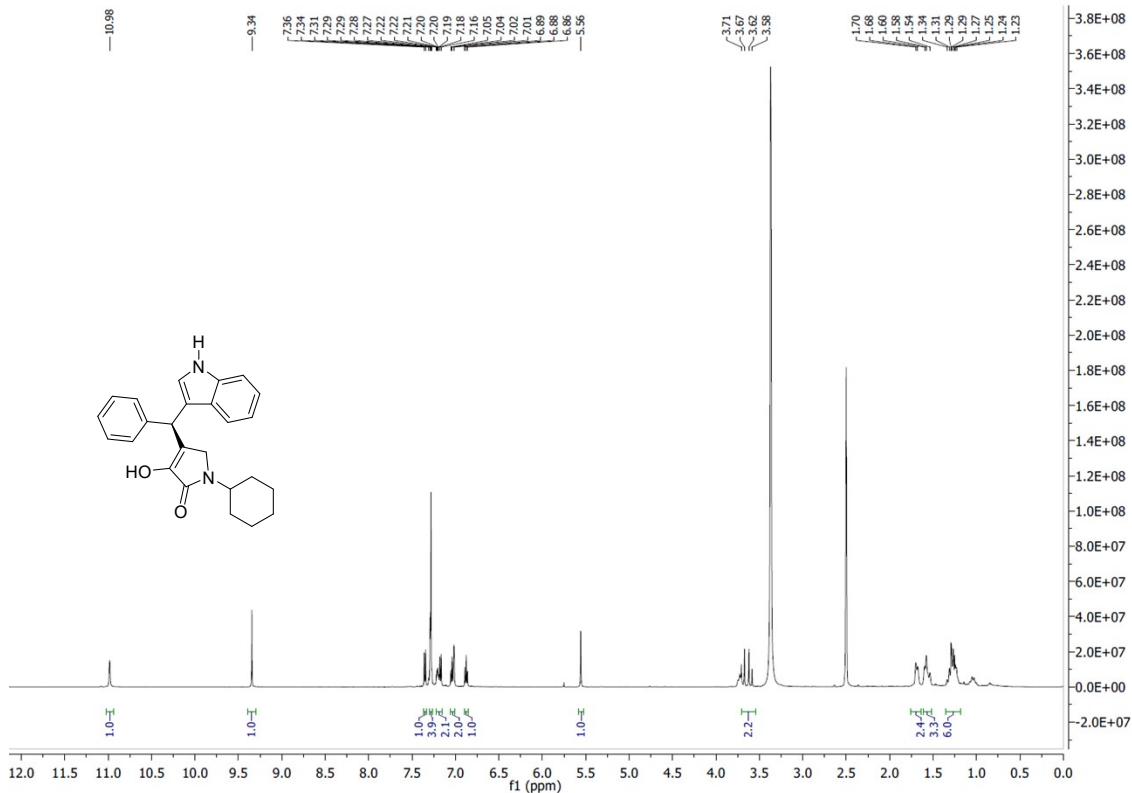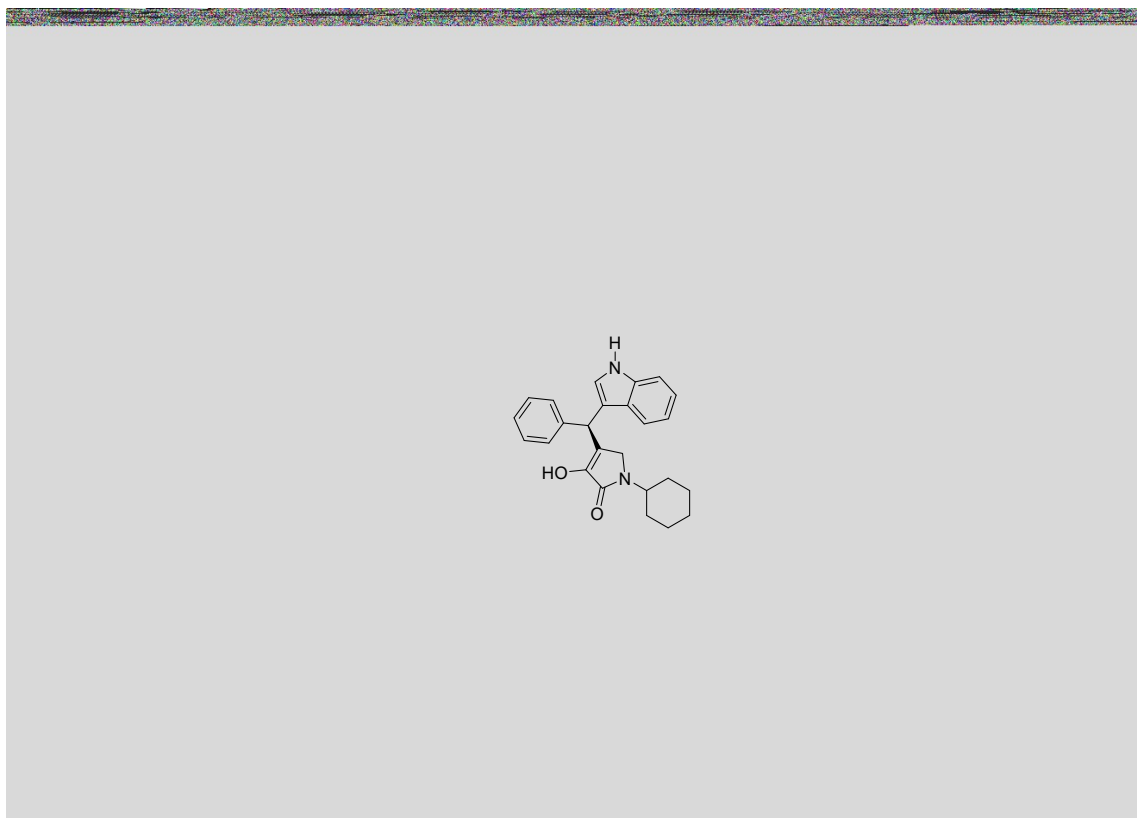

$^1\text{H}$  NMR and  $^{13}\text{C}$  NMR of **3o**

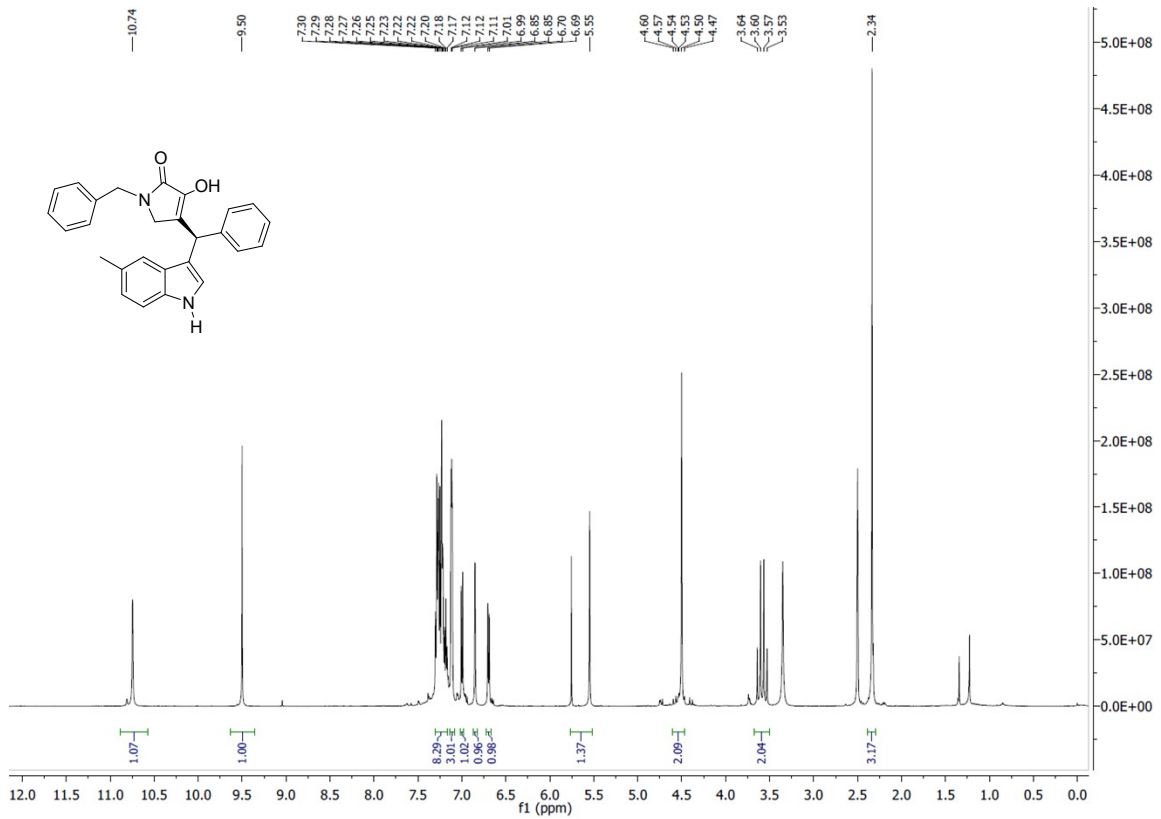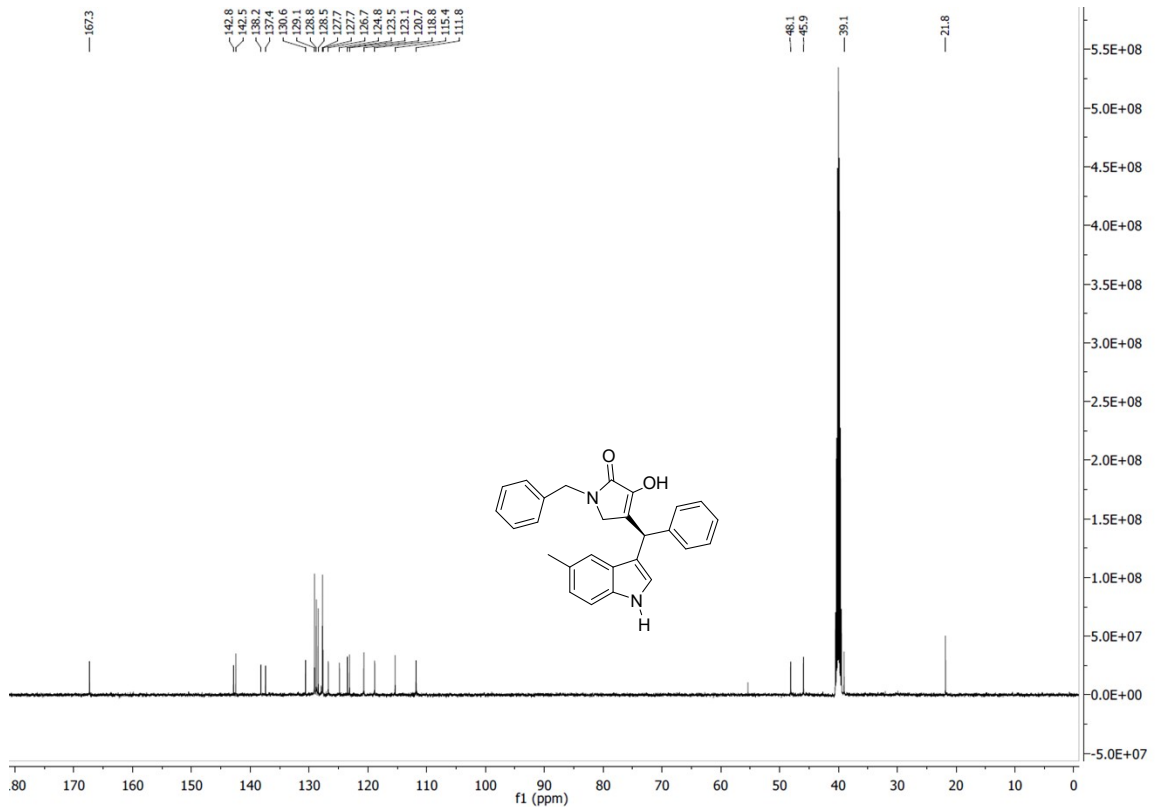

# <sup>1</sup>H NMR and <sup>13</sup>C NMR of 3p

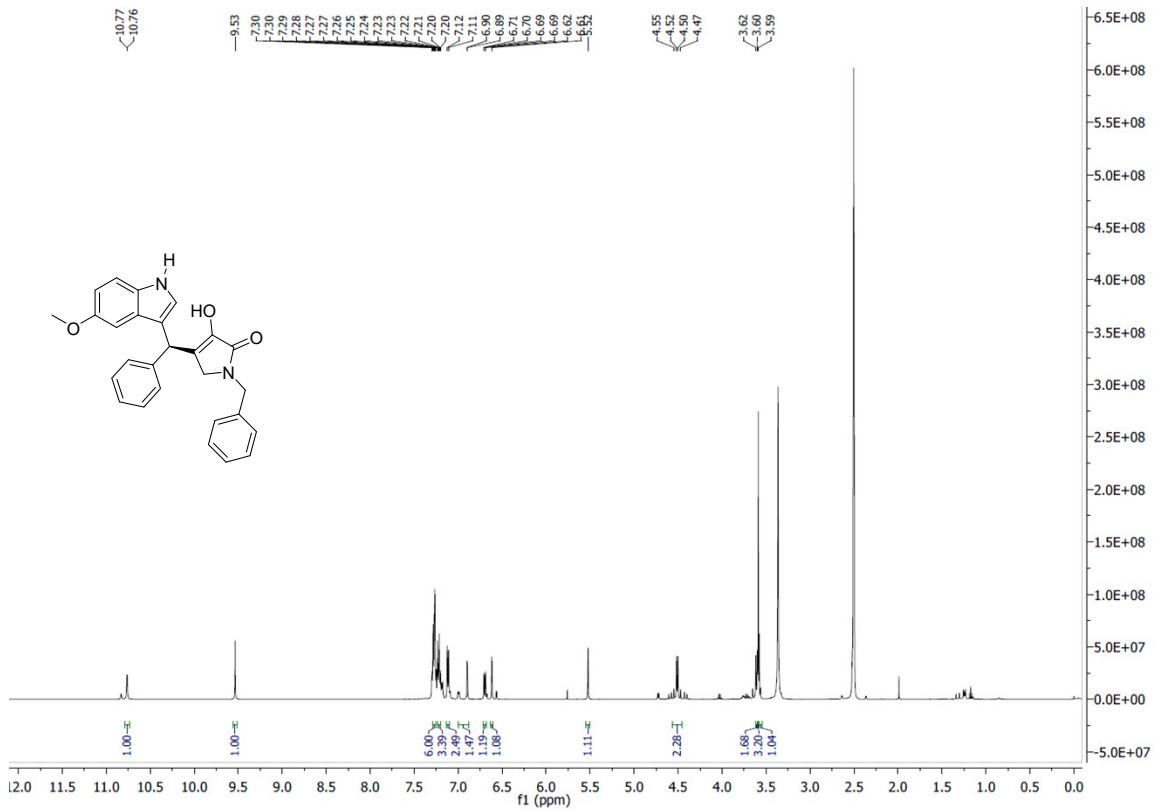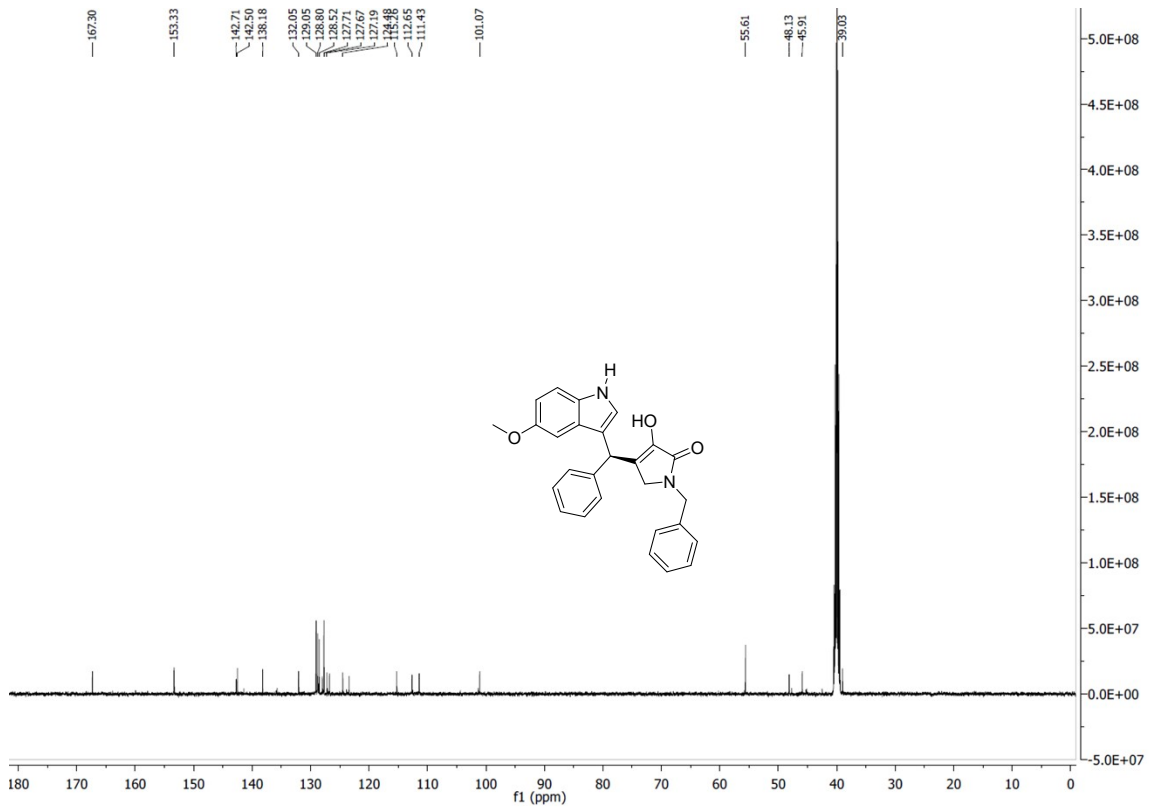

# $^1\text{H}$ NMR and $^{13}\text{C}$ NMR of **3q**

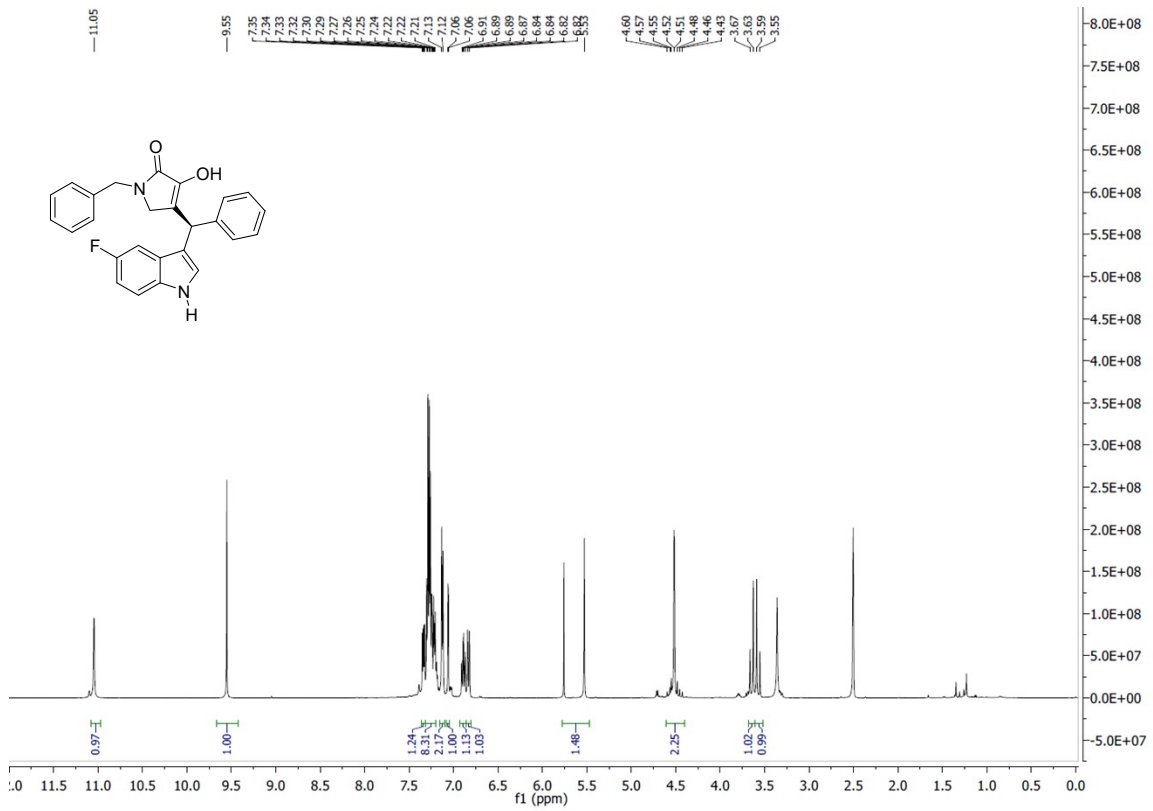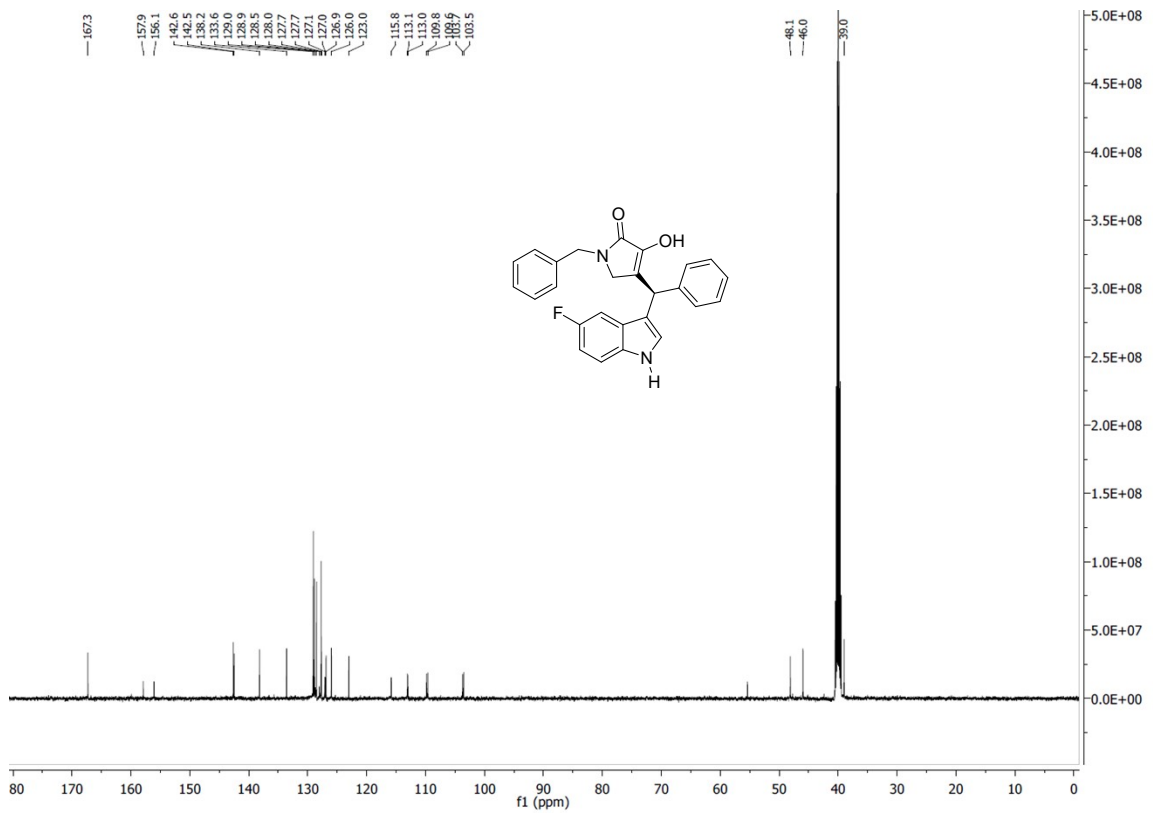

<sup>19</sup>F NMR of **3q**

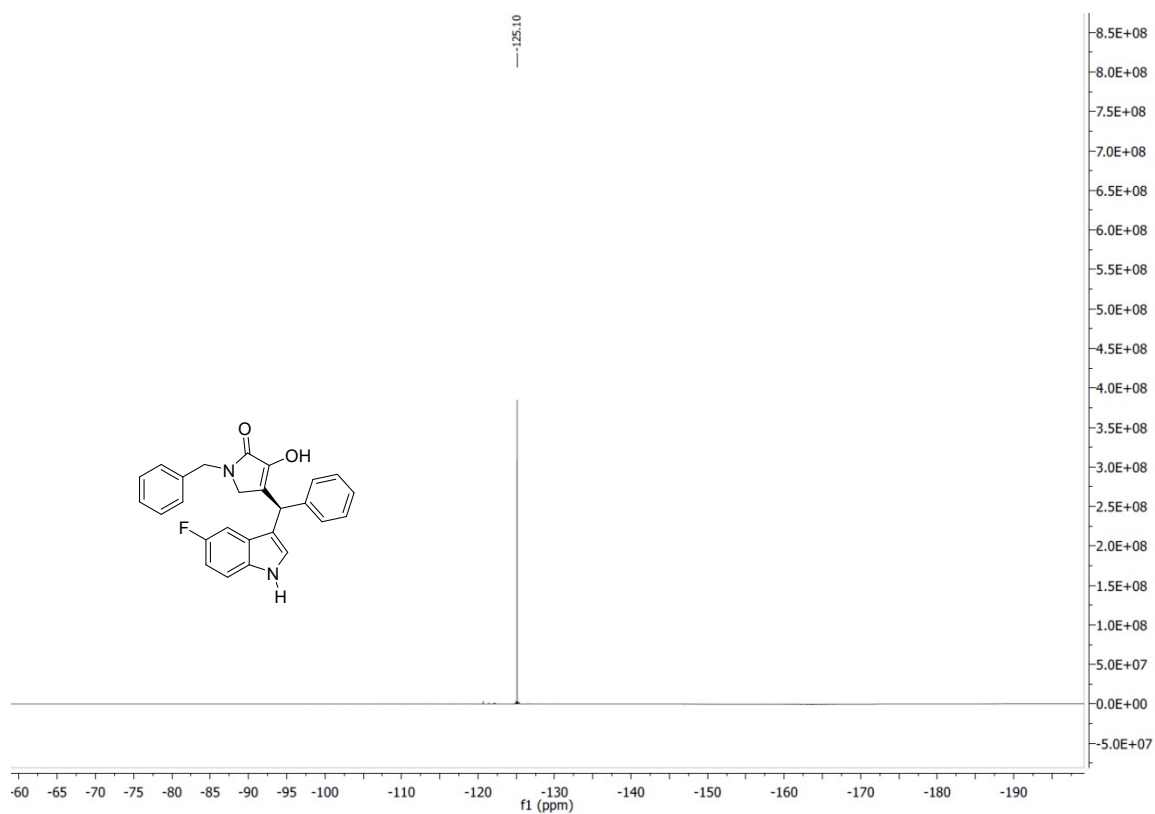

$^1\text{H}$  NMR and  $^{13}\text{C}$  NMR of **3r**

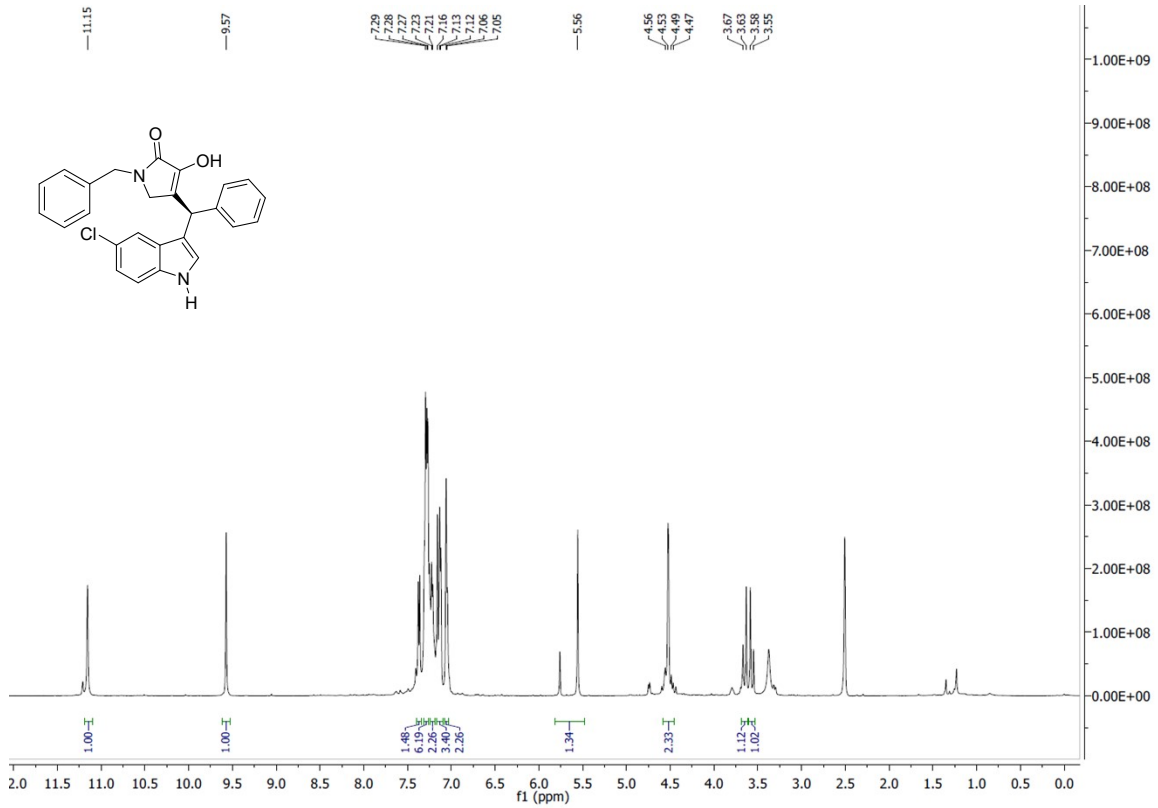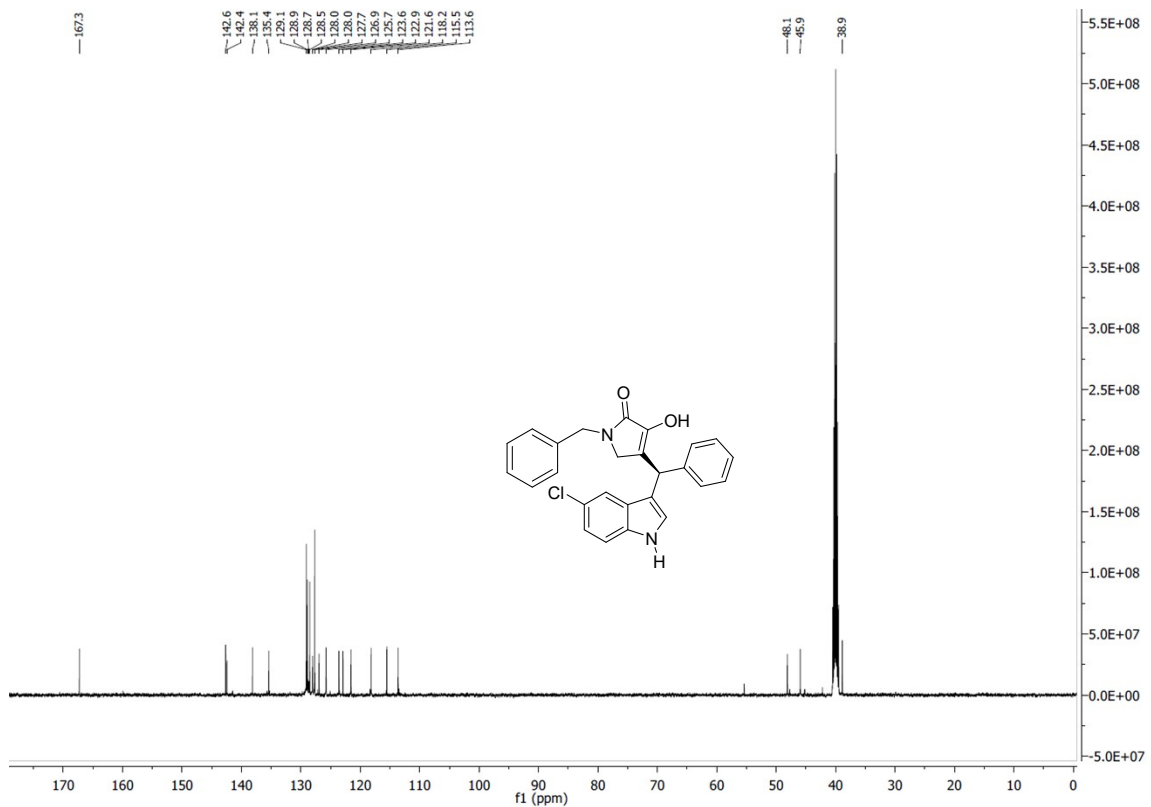





# $^1\text{H}$ NMR and $^{13}\text{C}$ NMR of **4a**

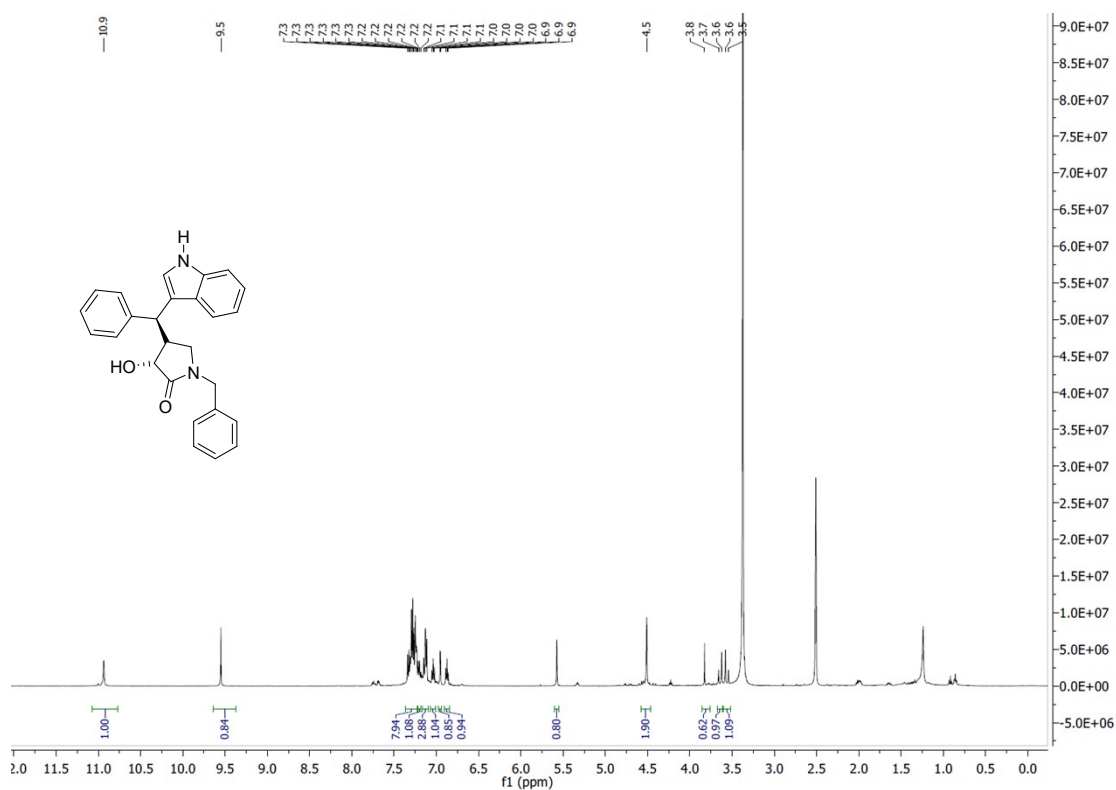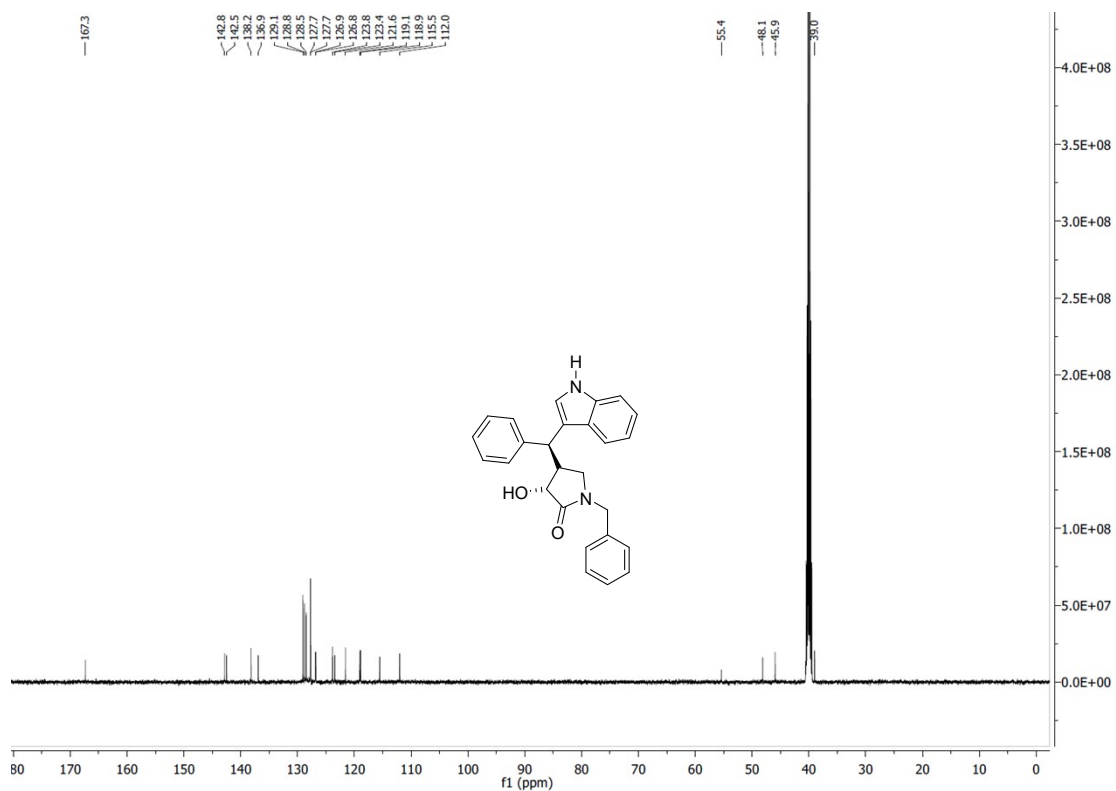

## Part 4: HPLC Spectra

### 3a Racemic Mixture

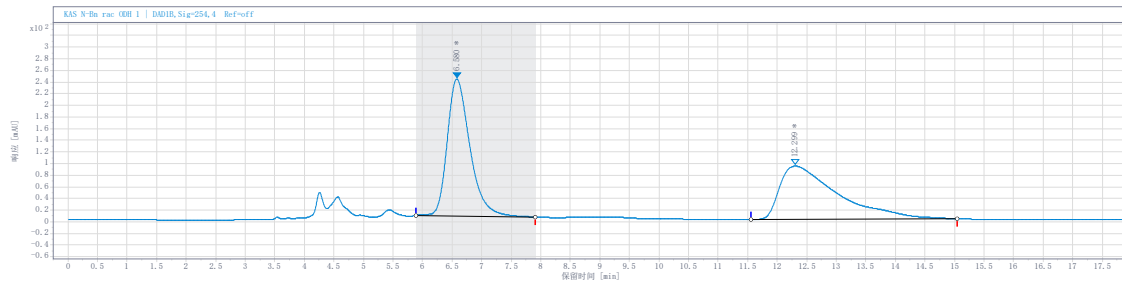

Signal: DAD1B, Sig=254, 4 Ref=off

| RetTime [min] | width [min] | Arer [mAU*s] | Height [mAU] | Area% |
|---------------|-------------|--------------|--------------|-------|
| 6.58          | 2.02        | 6259.26      | 235.27       | 50.19 |
| 12.3          | 3.49        | 6211.40      | 91.29        | 49.81 |

### 3a

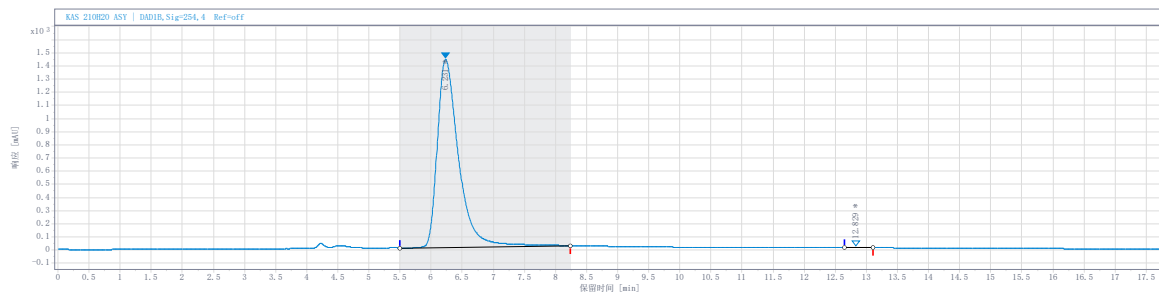

Signal: DAD1B, Sig=254, 4 Ref=off

| RetTime [min] | width [min] | Arer [mAU*s] | Height [mAU] | Area% |
|---------------|-------------|--------------|--------------|-------|
| 6.23          | 2.74        | 33985.92     | 1428.30      | 99.89 |
| 12.8          | 0.46        | 36.68        | 2.10         | 0.11  |

### 3b Racemic Mixture

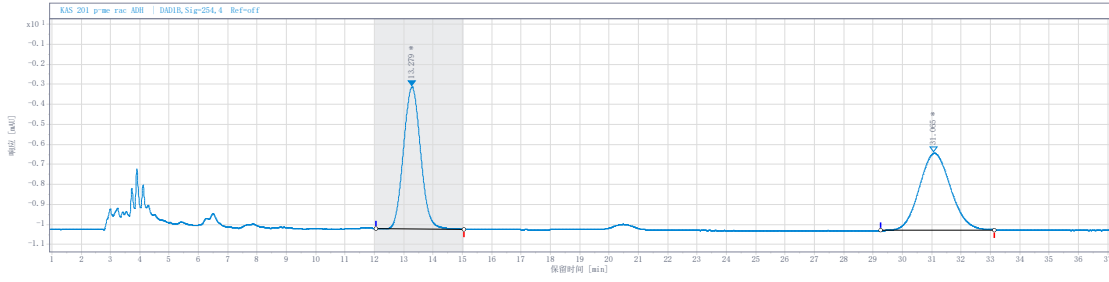

Signal: DAD1B, Sig=254, 4 Ref=off

| RetTime [min] | width [min] | Area [mAU*s] | Height [mAU] | Area% |
|---------------|-------------|--------------|--------------|-------|
| 13.3          | 3.02        | 284.62       | 7.08         | 50.12 |
| 31.1          | 3.87        | 283.21       | 3.84         | 49.88 |

### 3b

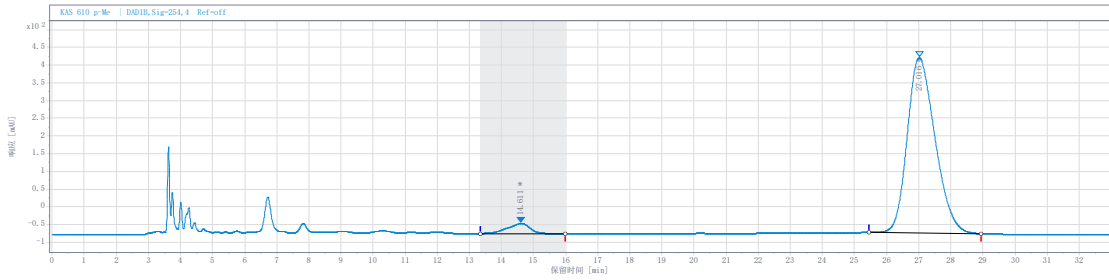

Signal: DAD1B, Sig=254, 4 Ref=off

| RetTime [min] | width [min] | Area [mAU*s] | Height [mAU] | Area% |
|---------------|-------------|--------------|--------------|-------|
| 14.6          | 2.67        | 1352.95      | 28.51        | 4.32  |
| 27.0          | 4.49        | 29993.50     | 495.26       | 95.68 |

### 3c Racemic Mixture

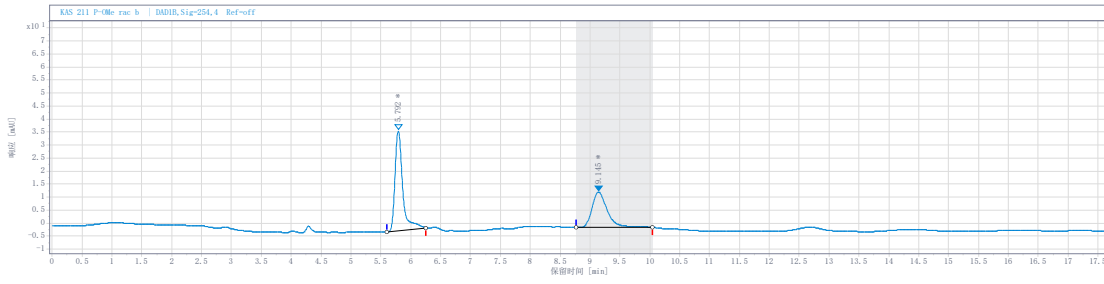

Signal: DAD1B, Sig=254, 4 Ref=off

| RetTime [min] | width [min] | Arer [mAU*s] | Height [mAU] | Area% |
|---------------|-------------|--------------|--------------|-------|
| 5.79          | 0.65        | 334.83       | 38.33        | 58.24 |
| 9.15          | 1.28        | 240.04       | 13.63        | 41.76 |

### 3c

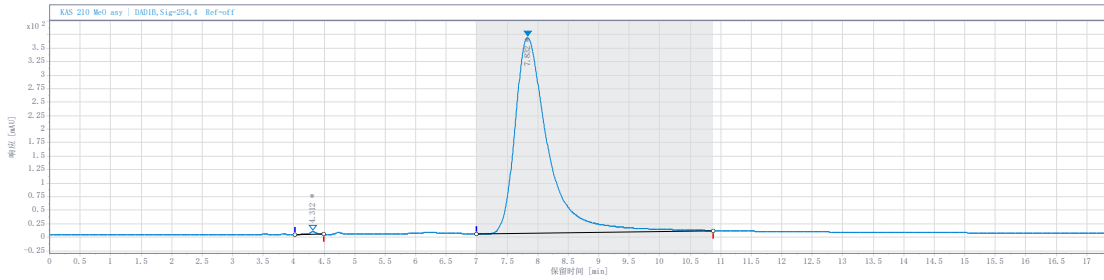

Signal: DAD1B, Sig=254, 4 Ref=off

| RetTime [min] | width [min] | Arer [mAU*s] | Height [mAU] | Area% |
|---------------|-------------|--------------|--------------|-------|
| 4.31          | 0.48        | 41.75        | 5.16         | 0.31  |
| 7.83          | 3.88        | 13620.97     | 362.10       | 99.69 |

### 3d Racemic Mixture

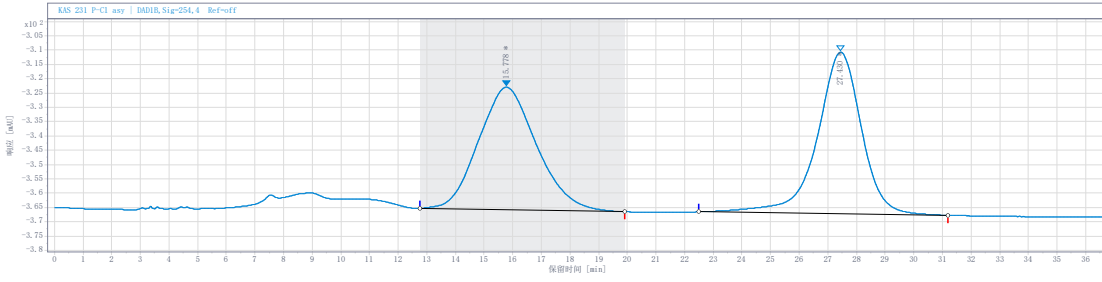

Signal: DAD1B, Sig=254,4 Ref=off

| RetTime [min] | width [min] | Arer [mAU*s] | Height [mAU] | Area% |
|---------------|-------------|--------------|--------------|-------|
| 15.8          | 7.15        | 6032.17      | 42.84        | 49.93 |
| 27.4          | 8.69        | 6047.91      | 56.45        | 50.07 |

### 3d

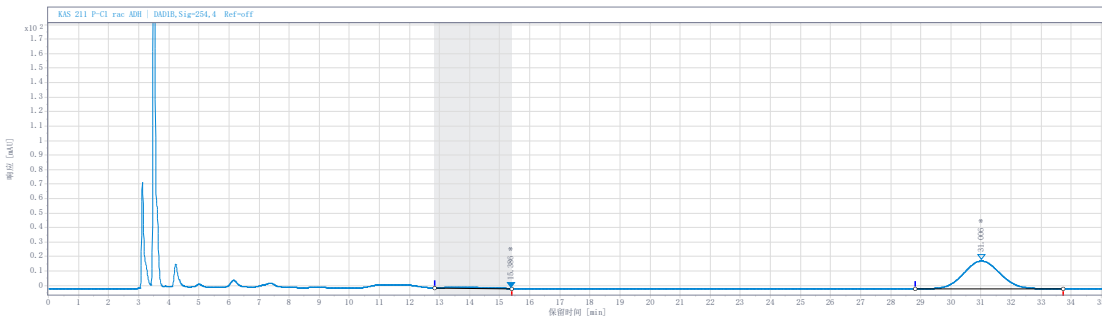

Signal: DAD1B, Sig=254,4 Ref=off

| RetTime [min] | width [min] | Arer [mAU*s] | Height [mAU] | Area% |
|---------------|-------------|--------------|--------------|-------|
| 15.4          | 2.55        | 34.86        | 0.00         | 2.12  |
| 31.0          | 4.91        | 1610.05      | 19.23        | 97.88 |

### 3e Racemic Mixture

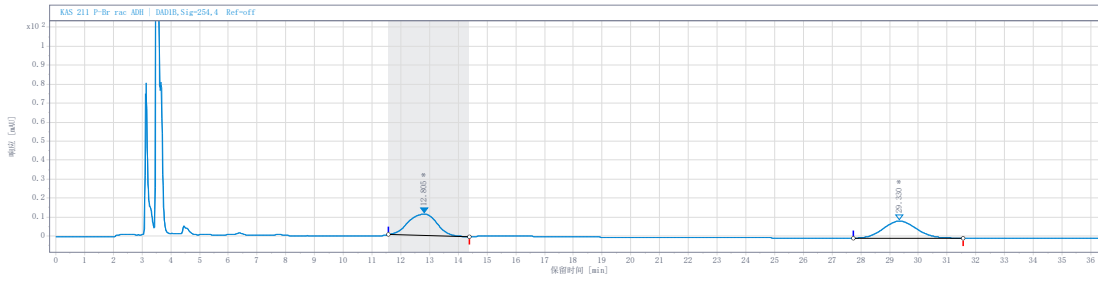

Signal: DAD1B, Sig=254, 4 Ref=off

| RetTime [min] | width [min] | Arer [mAU*s] | Height [mAU] | Area% |
|---------------|-------------|--------------|--------------|-------|
| 12.8          | 2.83        | 775.58       | 11.23        | 52.03 |
| 29.3          | 3.82        | 715.16       | 8.93         | 47.97 |

### 3e

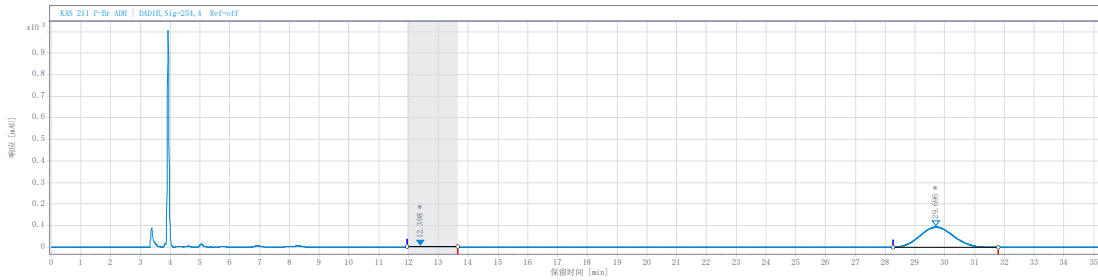

Signal: DAD1B, Sig=254, 4 Ref=off

| RetTime [min] | width [min] | Arer [mAU*s] | Height [mAU] | Area% |
|---------------|-------------|--------------|--------------|-------|
| 12.4          | 1.69        | 145.53       | 2.05         | 1.95  |
| 29.7          | 3.53        | 7327.08      | 93.30        | 98.05 |

### 3f Racemic Mixture

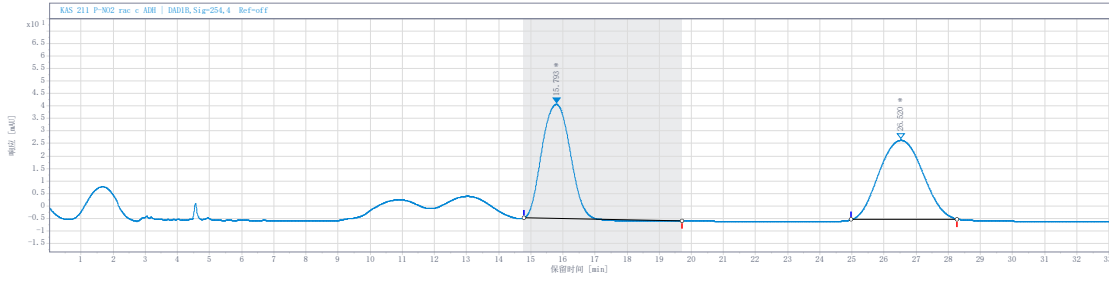

Signal: DAD1B, Sig=254, 4 Ref=off

| RetTime [min] | width [min] | Area [mAU*s] | Height [mAU] | Area% |
|---------------|-------------|--------------|--------------|-------|
| 15.8          | 4.92        | 2760.25      | 45.73        | 48.11 |
| 26.5          | 3.28        | 2977.15      | 31.71        | 51.89 |

### 3f

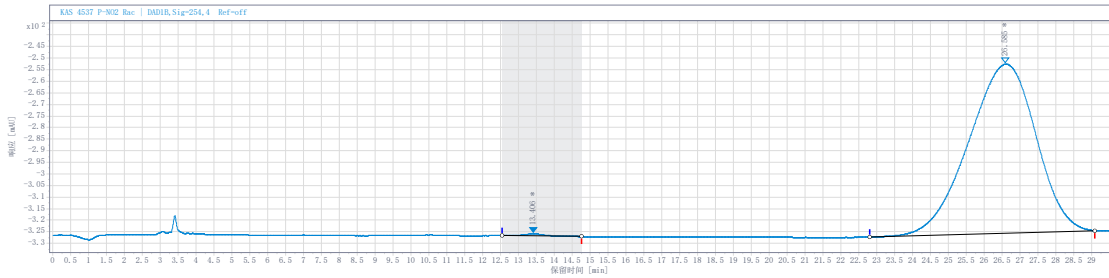

Signal: DAD1B, Sig=254, 4 Ref=off

| RetTime [min] | width [min] | Area [mAU*s] | Height [mAU] | Area% |
|---------------|-------------|--------------|--------------|-------|
| 13.4          | 2.22        | 38.50        | 0.92         | 0.40  |
| 26.6          | 6.28        | 9526.95      | 72.97        | 99.60 |



### 3g Racemic Mixture

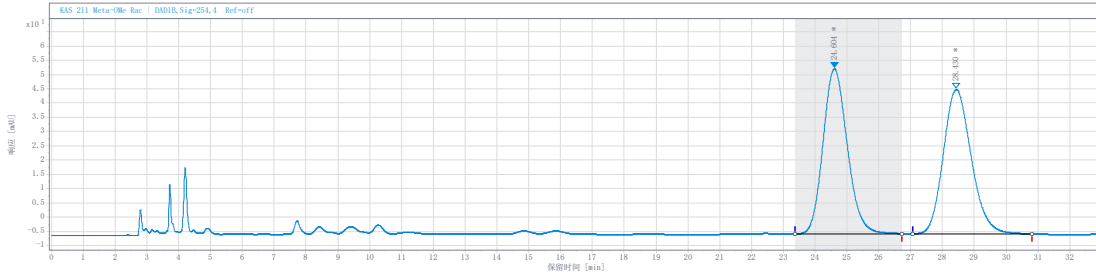

Signal: DAD1B, Sig=254, 4 Ref=off

| RetTime [min] | width [min] | Area [mAU*s] | Height [mAU] | Area% |
|---------------|-------------|--------------|--------------|-------|
| 24.6          | 2.74        | 3024.41      | 57.67        | 49.78 |
| 28.4          | 3.33        | 3051.61      | 50.49        | 50.22 |

### 3g

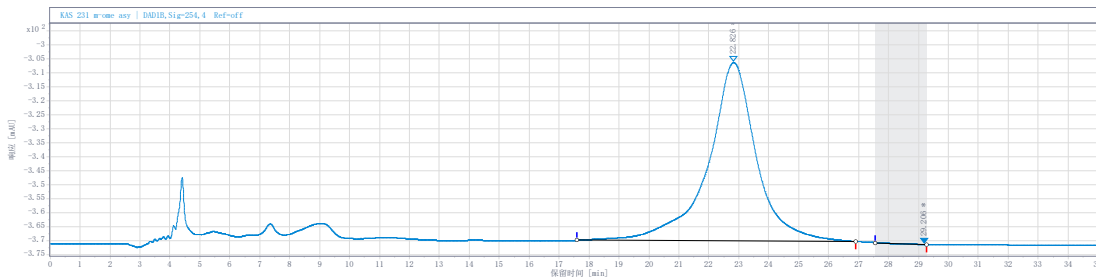

Signal: DAD1B, Sig=254, 4 Ref=off

| RetTime [min] | width [min] | Area [mAU*s] | Height [mAU] | Area% |
|---------------|-------------|--------------|--------------|-------|
| 22.8          | 9.30        | 7155.99      | 63.72        | 99.91 |
| 29.2          | 1.70        | 6.67         | 0.03         | 0.09  |

### 3h Racemic Mixture

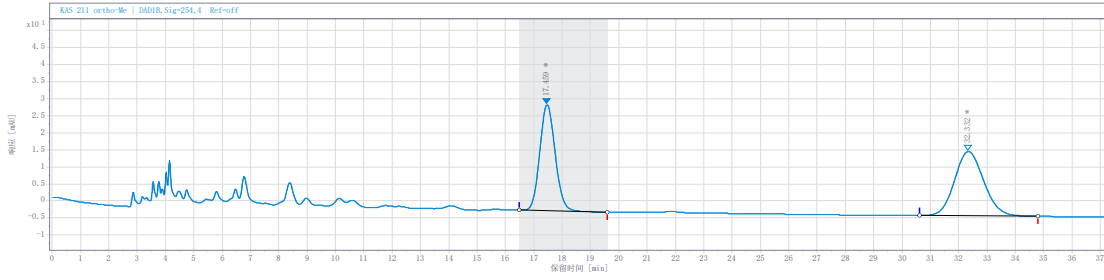

Signal: DAD1B, Sig=254, 4 Ref=off

| RetTime [min] | width [min] | Arer [mAU*s] | Height [mAU] | Area% |
|---------------|-------------|--------------|--------------|-------|
| 17.5          | 3.10        | 1165.86      | 31.04        | 46.44 |
| 32.3          | 4.17        | 1344.69      | 18.81        | 53.56 |

### 3h

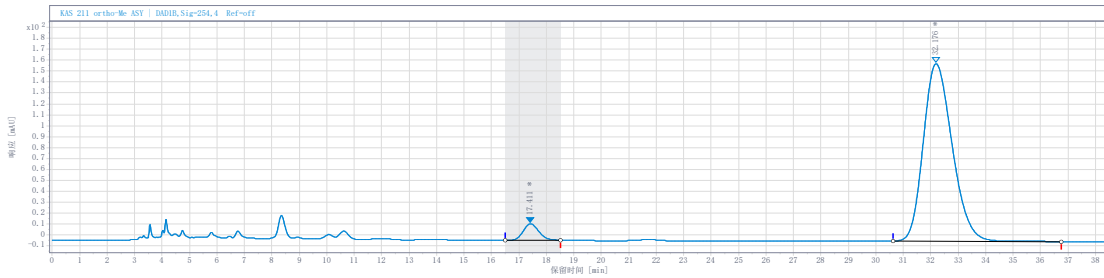

Signal: DAD1B, Sig=254, 4 Ref=off

| RetTime [min] | width [min] | Arer [mAU*s] | Height [mAU] | Area% |
|---------------|-------------|--------------|--------------|-------|
| 17.4          | 1.99        | 589.15       | 15.07        | 4.73  |
| 32.2          | 6.10        | 11875.07     | 162.67       | 95.27 |

### 3i Racemic Mixture

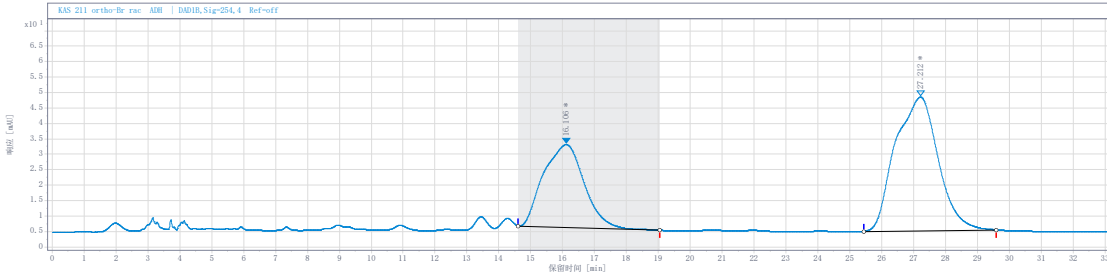

Signal: DAD1B, Sig=254, 4 Ref=off

| RetTime [min] | width [min] | Arer [mAU*s] | Height [mAU] | Area% |
|---------------|-------------|--------------|--------------|-------|
| 16.1          | 4.43        | 2392.00      | 26.88        | 37.16 |
| 27.2          | 4.15        | 4045.42      | 43.28        | 62.84 |

### 3i

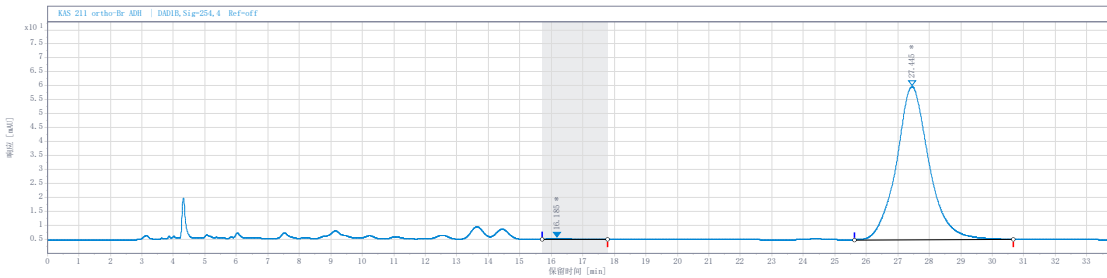

Signal: DAD1B, Sig=254, 4 Ref=off

| RetTime [min] | width [min] | Arer [mAU*s] | Height [mAU] | Area% |
|---------------|-------------|--------------|--------------|-------|
| 16.2          | 2.06        | 13.52        | 0.32         | 0.34  |
| 27.4          | 5.05        | 3922.73      | 54.66        | 99.66 |

### 3j Racemic Mixture

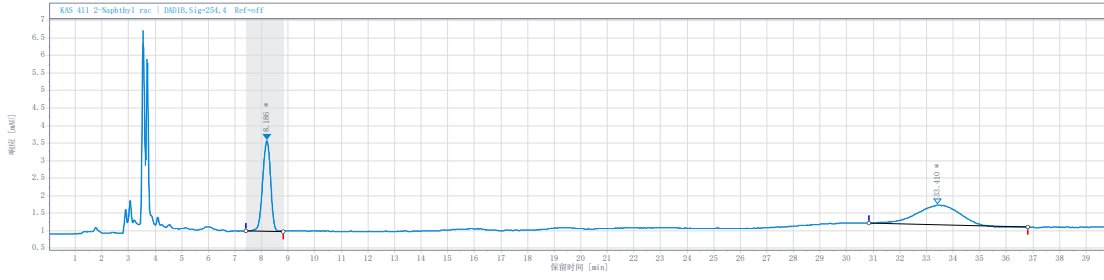

Signal: DAD1B, Sig=254, 4 Ref=off

| RetTime [min] | width [min] | Area [mAU*s] | Height [mAU] | Area% |
|---------------|-------------|--------------|--------------|-------|
| 8.19          | 1.38        | 53.29        | 2.58         | 46.13 |
| 33.4          | 5.97        | 62.24        | 0.55         | 53.87 |

### 3j

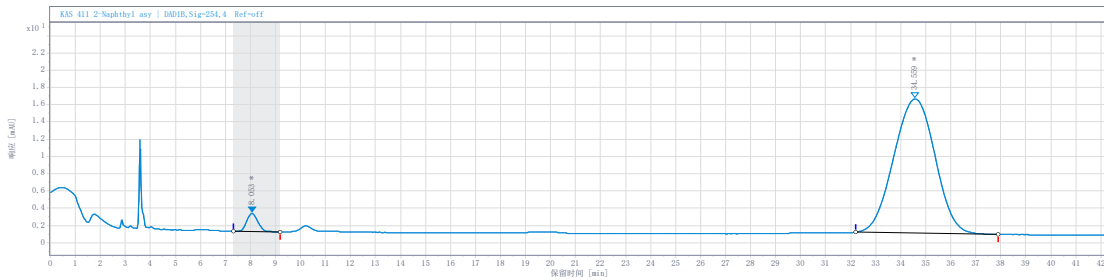

Signal: DAD1B, Sig=254, 4 Ref=off

| RetTime [min] | width [min] | Area [mAU*s] | Height [mAU] | Area% |
|---------------|-------------|--------------|--------------|-------|
| 8.05          | 1.85        | 63.14        | 2.09         | 3.42  |
| 34.6          | 5.70        | 1782.60      | 15.55        | 96.58 |

### 3k Racemic Mixture

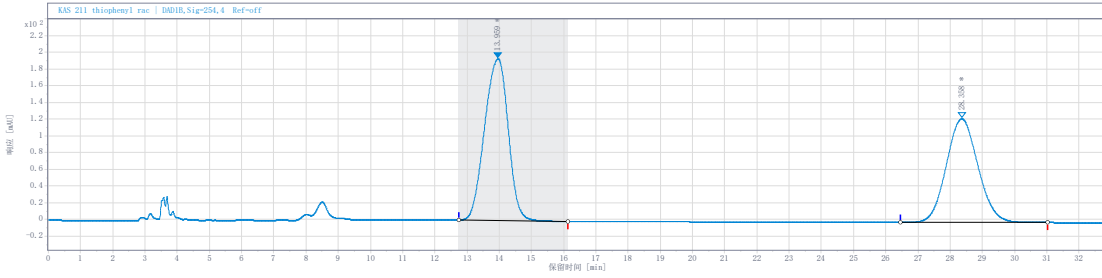

Signal: DAD1B, Sig=254, 4 Ref=off

| RetTime [min] | width [min] | Area [mAU*s] | Height [mAU] | Area% |
|---------------|-------------|--------------|--------------|-------|
| 14.0          | 3.37        | 9851.66      | 193.48       | 53.82 |
| 28.4          | 4.55        | 8451.79      | 123.89       | 46.18 |

### 3k

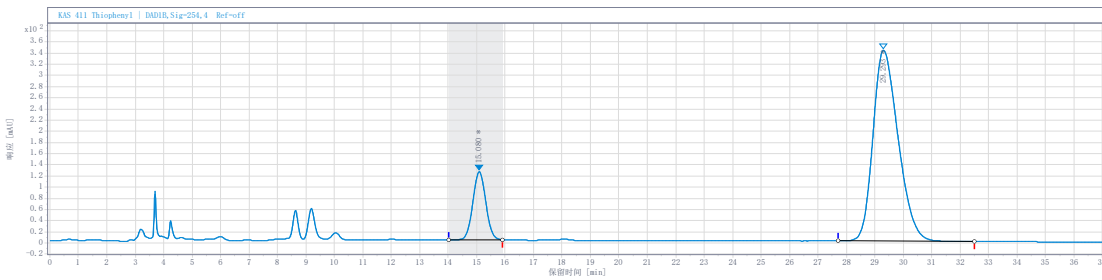

Signal: DAD1B, Sig=254, 4 Ref=off

| RetTime [min] | width [min] | Area [mAU*s] | Height [mAU] | Area% |
|---------------|-------------|--------------|--------------|-------|
| 15.1          | 1.91        | 3864.54      | 122.25       | 15.52 |
| 29.3          | 4.79        | 21038.83     | 341.97       | 84.48 |

### 3I Racemic Mixture

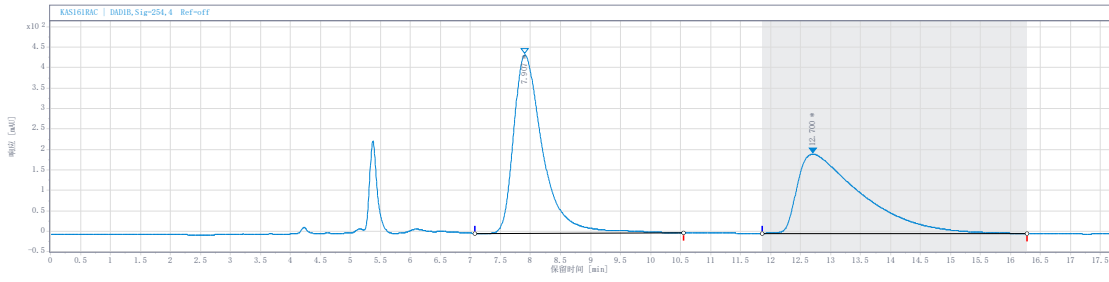

Signal: DAD1B, Sig=254, 4 Ref=off

| RetTime [min] | width [min] | Area [mAU*s] | Height [mAU] | Area% |
|---------------|-------------|--------------|--------------|-------|
| 7.91          | 3.48        | 14712.66     | 435.63       | 50.69 |
| 12.7          | 4.41        | 14309.37     | 193.51       | 49.31 |

### 3I

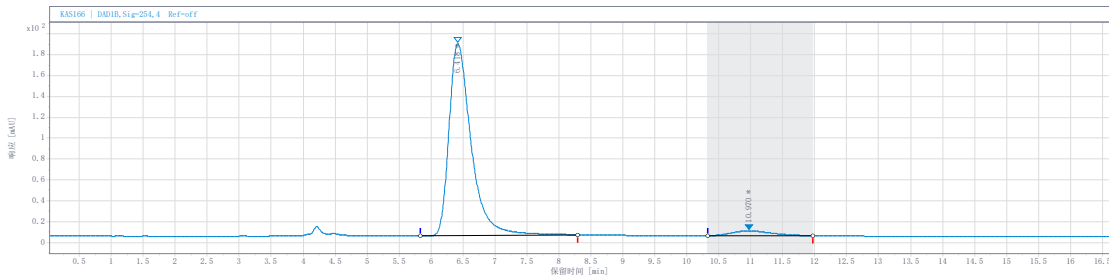

Signal: DAD1B, Sig=254, 4 Ref=off

| RetTime [min] | width [min] | Area [mAU*s] | Height [mAU] | Area% |
|---------------|-------------|--------------|--------------|-------|
| 6.42          | 2.45        | 4435.41      | 184.46       | 95.66 |
| 11.0          | 1.64        | 201.08       | 4.64         | 4.34  |

### 3m Racemic Mixture

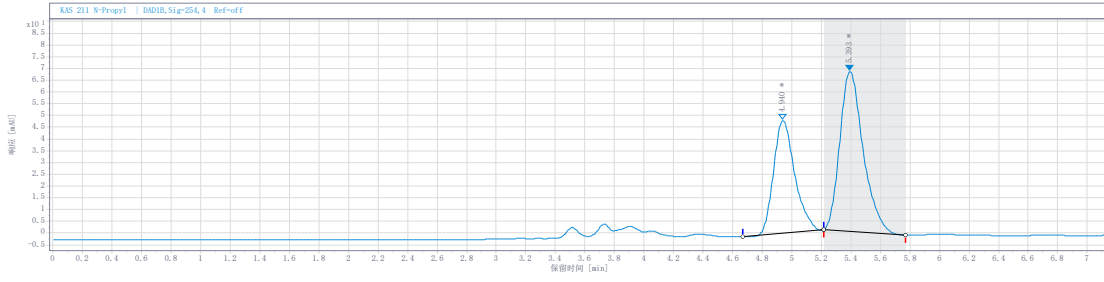

Signal: DAD1B, Sig=254, 4 Ref=off

| RetTime [min] | width [min] | Area [mAU*s] | Height [mAU] | Area% |
|---------------|-------------|--------------|--------------|-------|
| 4.94          | 0.55        | 473.21       | 47.90        | 38.68 |
| 5.39          | 0.55        | 750.22       | 68.09        | 61.32 |

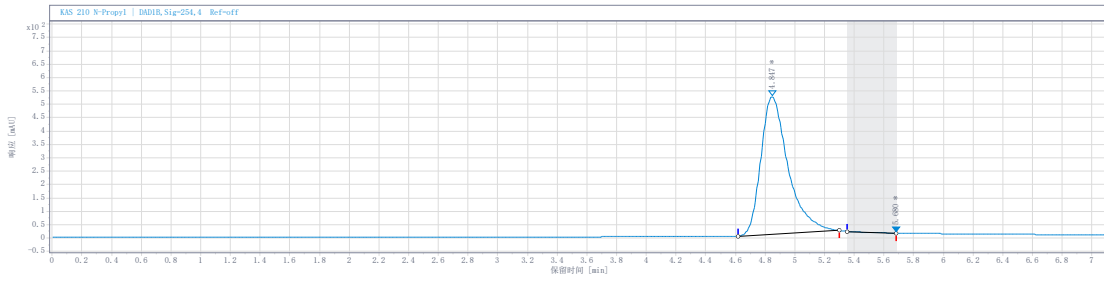

Signal: DAD1B, Sig=254, 4 Ref=off

| RetTime [min] | width [min] | Area [mAU*s] | Height [mAU] | Area% |
|---------------|-------------|--------------|--------------|-------|
| 4.85          | 0.68        | 6548.93      | 513.89       | 99.78 |
| 5.68          | 0.33        | 14.17        | 0.00         | 0.22  |

### 3n Racemic Mixture

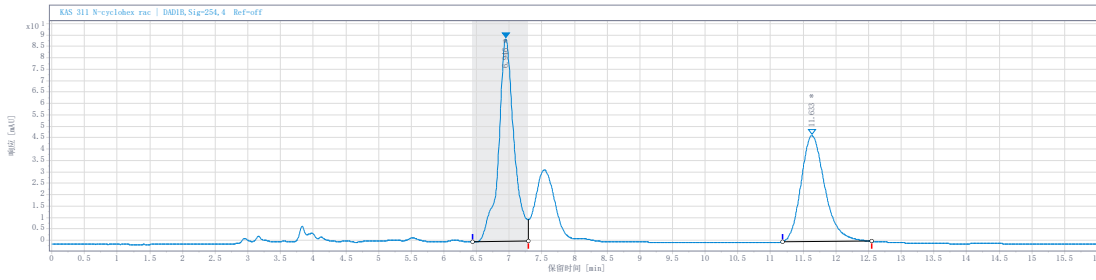

Signal: DAD1B, Sig=254, 4 Ref=off

| RetTime [min] | width [min] | Arer [mAU*s] | Height [mAU] | Area% |
|---------------|-------------|--------------|--------------|-------|
| 6.95          | 0.86        | 1465.38      | 88.86        | 55.45 |
| 11.6          | 1.36        | 1177.54      | 46.48        | 44.55 |

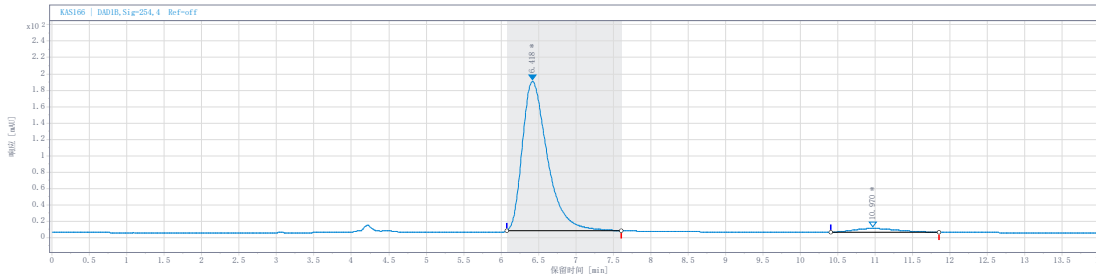

Signal: DAD1B, Sig=254, 4 Ref=off

| RetTime [min] | width [min] | Arer [mAU*s] | Height [mAU] | Area% |
|---------------|-------------|--------------|--------------|-------|
| 6.42          | 1.52        | 4254.20      | 182.66       | 95.84 |
| 11.0          | 1.45        | 184.53       | 4.46         | 4.16  |



### 3o Racemic Mixture

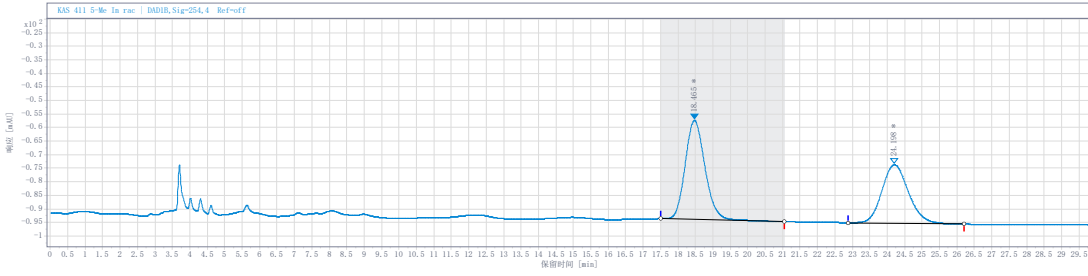

Signal: DAD1B, Sig=254,4 Ref=off

| RetTime [min] | width [min] | Arer [mAU*s] | Height [mAU] | Area% |
|---------------|-------------|--------------|--------------|-------|
| 18.5          | 3.56        | 1442.01      | 36.51        | 55.81 |
| 24.2          | 3.32        | 1141.78      | 21.61        | 44.19 |

### 3o

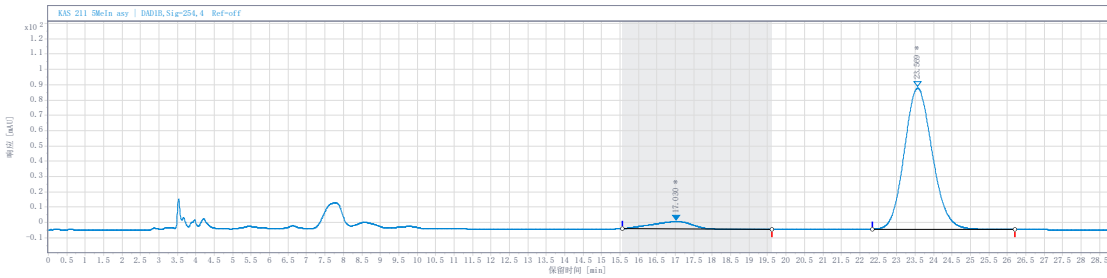

Signal: DAD1B, Sig=254,4 Ref=off

| RetTime [min] | width [min] | Arer [mAU*s] | Height [mAU] | Area% |
|---------------|-------------|--------------|--------------|-------|
| 17.0          | 4.05        | 348.42       | 4.73         | 6.71  |
| 23.6          | 3.86        | 4846.80      | 92.10        | 93.29 |

### 3p Racemic Mixture

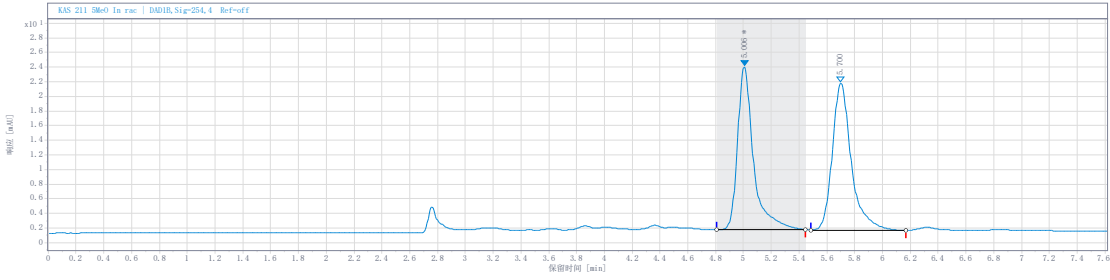

Signal: DAD1B, Sig=254, 4 Ref=off

| RetTime [min] | width [min] | Arer [mAU*s] | Height [mAU] | Area% |
|---------------|-------------|--------------|--------------|-------|
| 5.01          | 0.64        | 177.19       | 22.21        | 48.18 |
| 5.70          | 0.68        | 190.59       | 20.05        | 51.82 |

### 3p

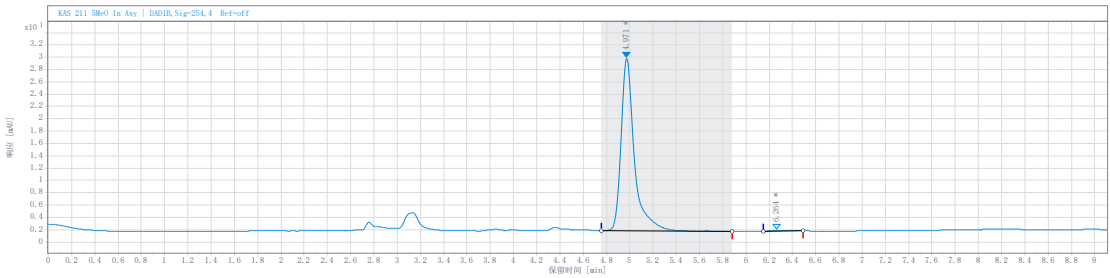

Signal: DAD1B, Sig=254, 4 Ref=off

| RetTime [min] | width [min] | Arer [mAU*s] | Height [mAU] | Area% |
|---------------|-------------|--------------|--------------|-------|
| 4.97          | 1.13        | 220.78       | 27.98        | 99.51 |
| 6.26          | 0.34        | 1.09         | 0.14         | 0.49  |

### 3q Racemic Mixture

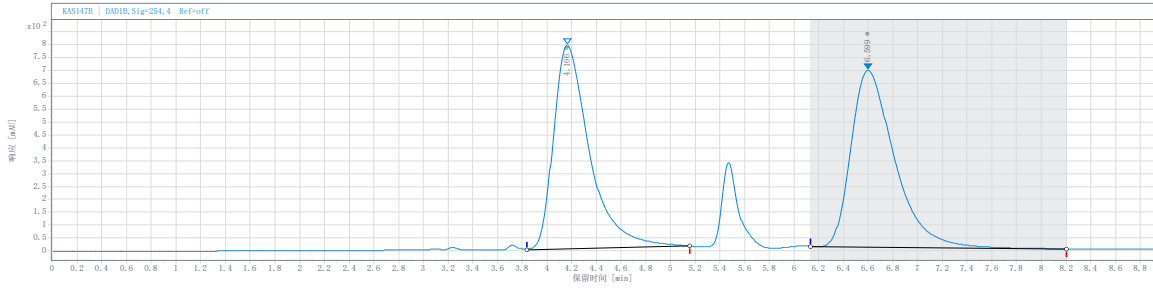

Signal: DAD1B, Sig=254, 4 Ref=off

| RetTime [min] | width [min] | Area [mAU*s] | Height [mAU] | Area% |
|---------------|-------------|--------------|--------------|-------|
| 4.17          | 1.32        | 15995.57     | 788.16       | 48.88 |
| 6.60          | 2.08        | 16728.67     | 682.79       | 51.12 |

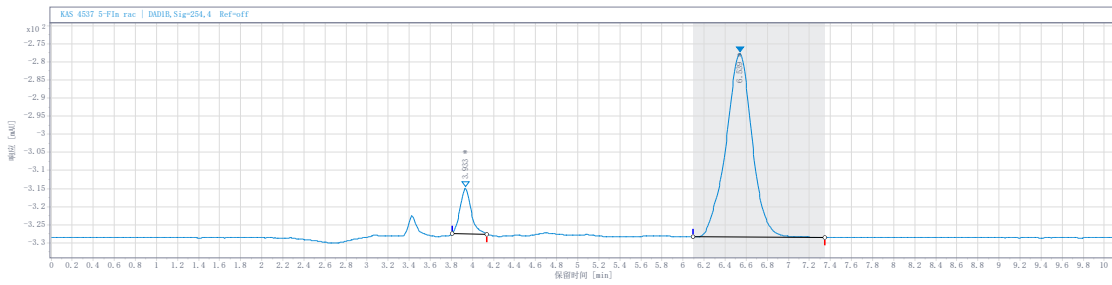

Signal: DAD1B, Sig=254, 4 Ref=off

| RetTime [min] | width [min] | Area [mAU*s] | Height [mAU] | Area% |
|---------------|-------------|--------------|--------------|-------|
| 3.93          | 0.33        | 91.37        | 12.50        | 9.48  |
| 6.54          | 1.25        | 872.34       | 50.69        | 90.52 |

### 3r Racemic Mixture

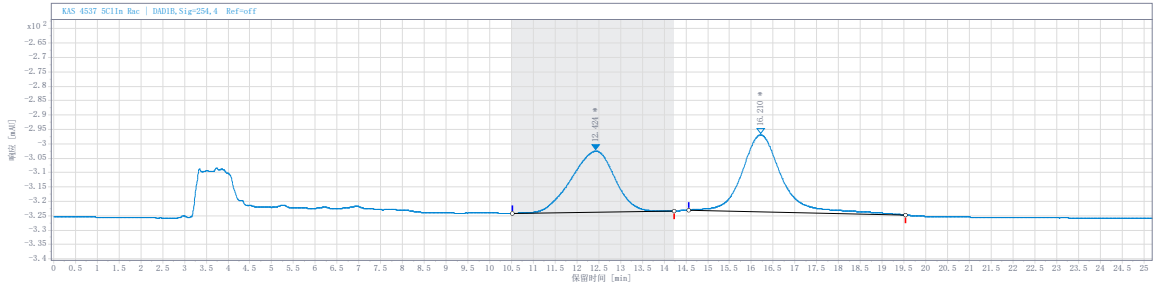

Signal: DAD1B, Sig=254, 4 Ref=off

| RetTime [min] | width [min] | Arer [mAU*s] | Height [mAU] | Area% |
|---------------|-------------|--------------|--------------|-------|
| 12.4          | 3.71        | 1462.46      | 21.15        | 46.31 |
| 16.2          | 4.97        | 1695.31      | 26.69        | 53.69 |

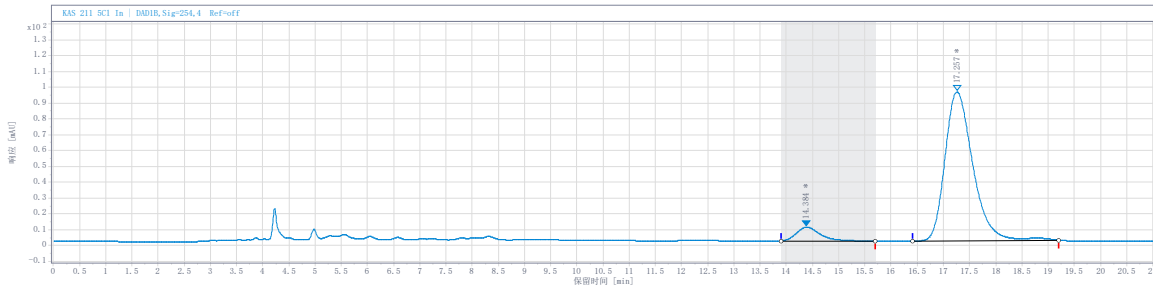

Signal: DAD1B, Sig=254, 4 Ref=off

| RetTime [min] | width [min] | Arer [mAU*s] | Height [mAU] | Area% |
|---------------|-------------|--------------|--------------|-------|
| 14.4          | 1.80        | 270.83       | 8.59         | 7.23  |
| 17.3          | 2.79        | 3474.15      | 93.93        | 92.77 |

### 3s Racemic Mixture

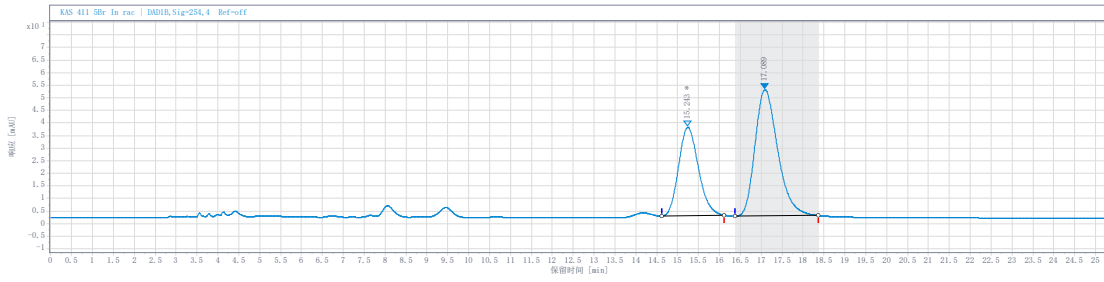

Signal: DAD1B, Sig=254, 4 Ref=off

| RetTime [min] | width [min] | Arer [mAU*s] | Height [mAU] | Area% |
|---------------|-------------|--------------|--------------|-------|
| 15.2          | 1.50        | 1158.84      | 35.12        | 37.91 |
| 17.1          | 2.00        | 1898.01      | 50.24        | 62.09 |

### 3s

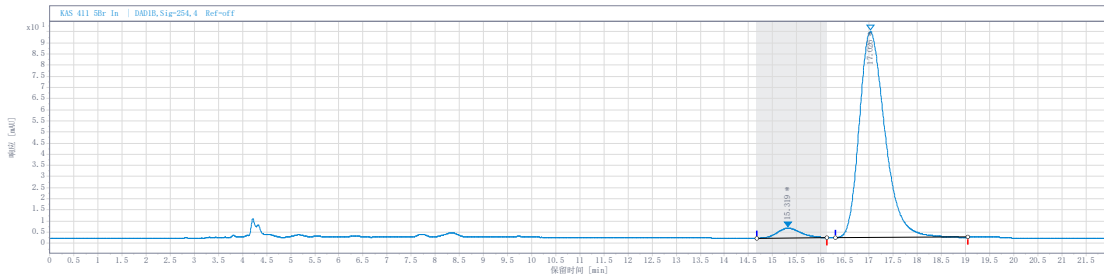

Signal: DAD1B, Sig=254, 4 Ref=off

| RetTime [min] | width [min] | Arer [mAU*s] | Height [mAU] | Area% |
|---------------|-------------|--------------|--------------|-------|
| 15.3          | 1.46        | 144.96       | 4.33         | 4.08  |
| 17.0          | 2.74        | 3412.22      | 92.40        | 95.92 |

#### 4a Racemic Mixture

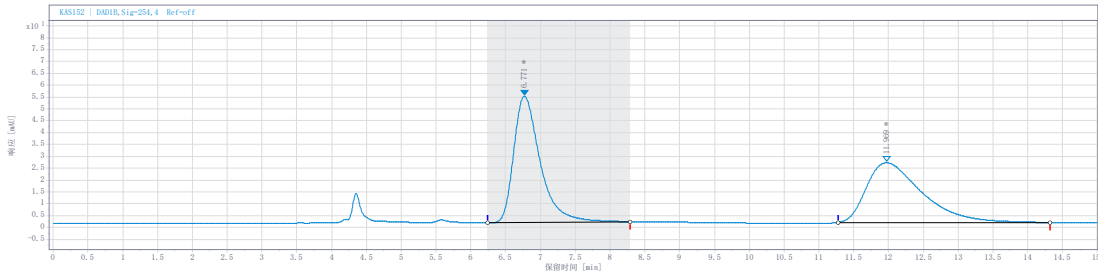

Signal: DAD1B, Sig=254, 4 Ref=off

| RetTime [min] | width [min] | Arer [mAU*s] | Height [mAU] | Area% |
|---------------|-------------|--------------|--------------|-------|
| 6.77          | 2.05        | 1409.73      | 53.34        | 50.29 |
| 12.0          | 3.04        | 1393.62      | 25.20        | 49.71 |

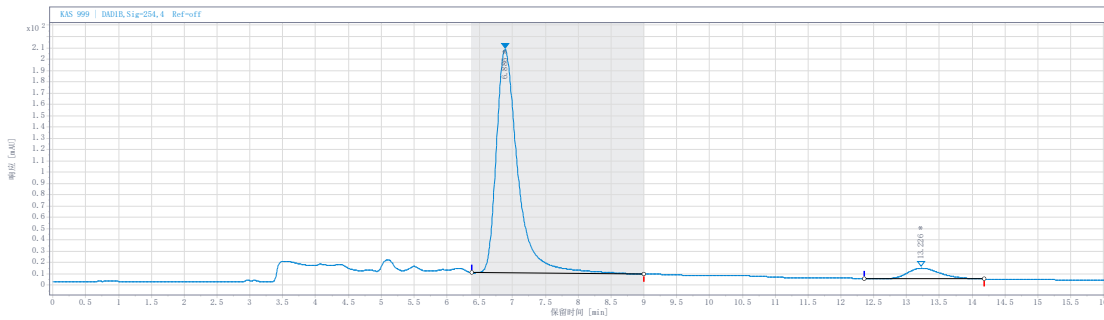

Signal: DAD1B, Sig=254, 4 Ref=off

| RetTime [min] | width [min] | Arer [mAU*s] | Height [mAU] | Area% |
|---------------|-------------|--------------|--------------|-------|
| 6.89          | 2.62        | 4552.64      | 197.89       | 93.46 |
| 13.2          | 1.82        | 318.44       | 9.36         | 6.54  |

## Part 5: Mechanistic Study

### 5.1 Control Experiments

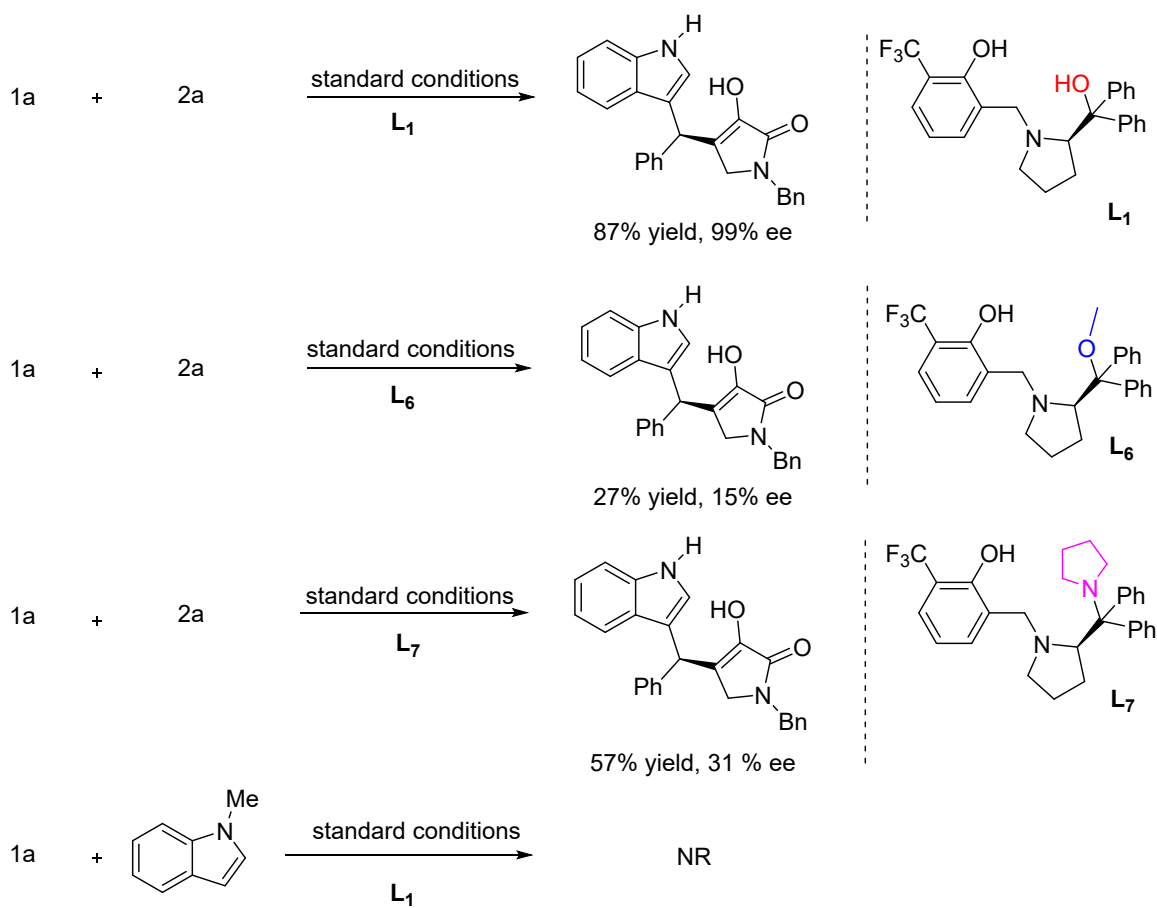

Scheme S1: Control Experiments

## 5.2 XPS analyses

### a) Preparation of samples

**Sample 1:**  $\text{Cu}(\text{OTf})_2$

**Sample 2:** The pre-catalyst was prepared by mixing  $\text{L}_1$  (10 mol %),  $\text{Cu}(\text{OTf})_2$  (10 mol %) and  $\text{Et}_3\text{N}$  (20 mol %) in  $\text{H}_2\text{O}/\text{Tol}$  (0.9/0.1) mL and stirred for two hours at ambient atmosphere, then evaporated in vacuum. Extract with DCM dry by anhydrous  $\text{MgSO}_4$  and evaporated in vacuum to obtain the pre-catalyst.

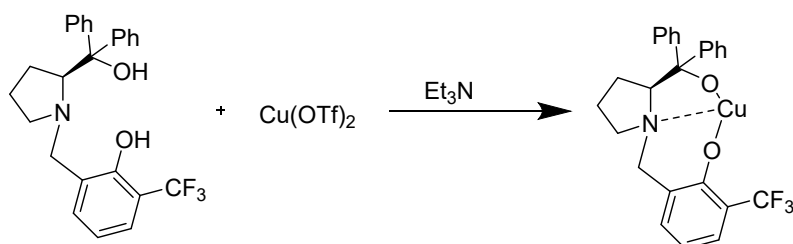

**Sample 3:** The pre-catalyst was prepared by mixing  $\text{L}_1$  (10 mol %), and  $\text{Cu}(\text{OTf})_2$  (20 mol %) in  $\text{H}_2\text{O}/\text{Tol}$  (0.9/0.1) mL and stirred for two hours at ambient atmosphere, then evaporated in vacuum. Extract with DCM dry by anhydrous  $\text{MgSO}_4$  and evaporated in vacuum to obtain the pre-catalyst.

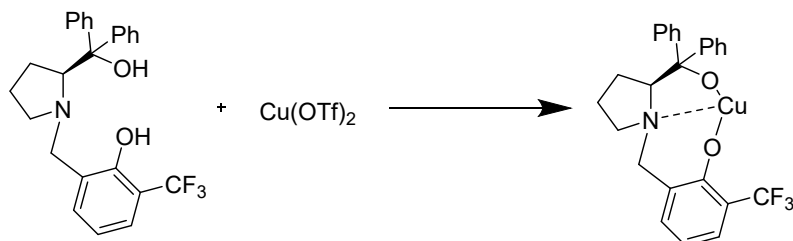

**Sample 4:** the pre-catalyst was prepared by mixing  $\text{L}_6$  (10 mol %),  $\text{Cu}(\text{OTf})_2$  (10 mol %) and  $\text{Et}_3\text{N}$  (20 mol %) in  $\text{H}_2\text{O}/\text{Tol}$  (0.9/0.1) mL and stirred for two hours at ambient atmosphere, then evaporated in vacuum. Extract with DCM dry by anhydrous  $\text{MgSO}_4$  and evaporated in vacuum to obtain the pre-catalyst.

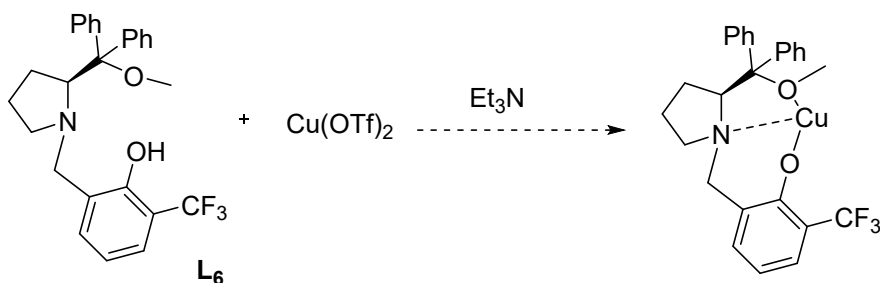



**Sample 5:** the pre-catalyst was prepared by mixing **L<sub>7</sub>** (10 mol %), Cu(OTf)<sub>2</sub> (10 mol %) and Et<sub>3</sub>N (20 mol %) in H<sub>2</sub>O/Tol (0.9/0.1) mL and stirred for two hours at ambient atmosphere, then evaporated in vacuum. Extract with DCM, dry by anhydrous MgSO<sub>4</sub> and evaporated in vacuum to obtain the precatalyst.

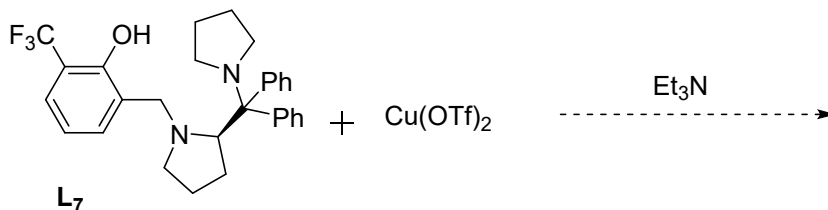

**Table S3:** Spectra of XPS

|                      |                     | <b>Sample 1</b> | <b>Sample 2</b> | <b>Sample 3</b> | <b>Sample 4</b> | <b>Sample 5</b> |
|----------------------|---------------------|-----------------|-----------------|-----------------|-----------------|-----------------|
| 1 <sup>st</sup> Bend | Binding Energy (eV) | 952.90          | 953.45          | 953.25          | 952.92          | 952.78          |
|                      | Intensity (a.u)     | 18108.06        | 5679.07         | 3543.11         | 3156.75         | 4068.87         |
| 2 <sup>nd</sup> Bend | Binding Energy (eV) | 933.00          | 933.65          | 933.15          | 932.72          | 932.99          |
|                      | Intensity (a.u)     | 22602.80        | 6354.11         | 3821.91         | 3334.56         | 4301.56         |

## Cu 2P

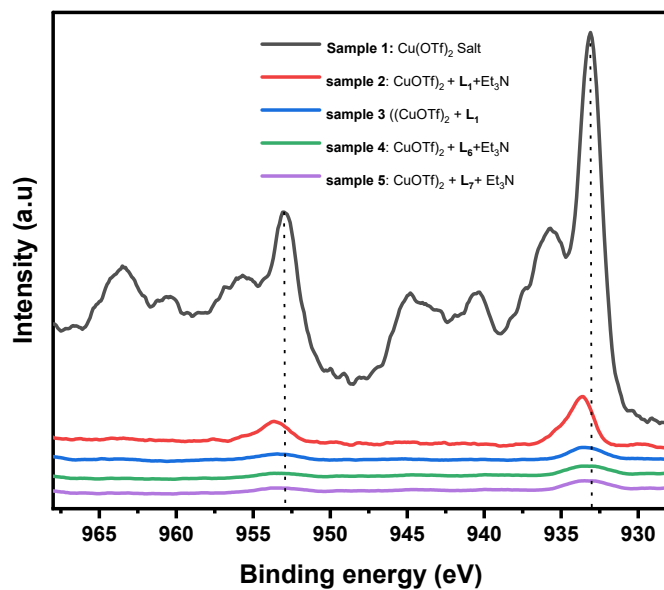

**Figure S1:** Grey line- sample 1 (Pure Cu(OTf)<sub>2</sub> Salt), Red Line-sample 2 (Cu(OTf)<sub>2</sub> + L<sub>1</sub> + Et<sub>3</sub>N), Blue Line-sample 3 (Cu(OTf)<sub>2</sub> + L<sub>1</sub>), Green Line-sample 4 (Cu(OTf)<sub>2</sub> + L<sub>6</sub> + Et<sub>3</sub>N), Mauve Line-sample 5 (Cu(OTf)<sub>2</sub> + L<sub>7</sub> + Et<sub>3</sub>N).

To further understand the reaction mechanism with regards the coordination environment around the copper center, we employed XPS analysis to investigate five samples as shown above, from the spectra of the XPS, it was observed that the binding energy increased considerably when **L<sub>1</sub>** with aliphatic OH group is added to the Cu salts in the presence of the base (sample 2, Red line) Compared to the binding energy of the pure copper salt (sample 1, grey line), only a slight increase was also observed when a base was not used (sample 3, blue line). We suppose the excess base could accelerate the rate of this reaction, perhaps due to the dehydro-alkenylation of indole. On the contrary the binding energy was observed to decrease when the copper is coordinated with ligand **L<sub>6</sub>** and **L<sub>7</sub>** respectively even in the presence of a base. The increase in binding energy of the Cu **2P** of the precatalyst indicate decrease in electronic density which should come as a result of the coordination with the hydroxyl group of **L<sub>1</sub>**. Binding energy difference of +0.5-0.6 eV (0.55 eV in our study with sample 1&2) for **2p** confirm complete chelation for Oxygen of the ligands in the copper metal complex. Our result appears reasonable and in keeping with the donor-acceptor concept of the Feltham-Brant possibly of empty S3d orbitals with respect to oxygen ligands.<sup>1</sup> The decrease in binding energy of the Cu **2P** of precatalyst ligand **L<sub>6</sub>** and **L<sub>7</sub>** indicated increase in electronic density which should come as a result of poor coordination with the methoxy and pyrrolidine groups of the ligand.

The catalyst is a complex of copper ion with the ligand, which was confirmed by the XPS experimental results. The copper ion of this complex should take a tri-dentate model, leaving the vacant to coordinate with the electron rich group. In comparison with water, the oxygen atom of 2,3-dioxopyrrolidine (**1a**) has a higher nucleophilicity than the oxygen in water since the O=C double bond at the 2,3-dioxopyrrolidine ring can conjugate with the neighboring sterene group, which assists the oxygen to bind the copper ions. On the other hand, NH at the indol ring (**2a**) has a higher than the oxygen. As a result, the indole (**2a**) occupies the other vacant of the copper ion. More importantly, the addition between **1a** and **2a** occurs once **1a** and **2a** coordinate with the copper ion to give the stable adduct, which promote the **1a** and **2a** coordination with the copper ions. When water binds to the center ions, in contrast, no adduct can be obtained. In other words, the nucleophile addition also assists the coordination of **1a** and **2a** with the copper ions.

**Table S4:** XPS DATA Binding Energy and Counts per second (Intensity).

| Sample1:<br>Cu(OTf) <sub>2</sub> |                   | Sample2:<br>Cu 2Sp<br>Base |                   | Sample3<br>Without<br>Base |                   | Sample 4<br>OMe<br>Cu 2p |                   | Sample 5<br>Py;<br>Cu2sp |                   |
|----------------------------------|-------------------|----------------------------|-------------------|----------------------------|-------------------|--------------------------|-------------------|--------------------------|-------------------|
| Binding energy (eV)              | Counts per second | Binding energy (eV)        | Counts per second | Binding energy (eV)        | Counts per second | Binding energy (eV)      | Counts per second | Binding energy (eV)      | Counts per second |
| 955.9017                         | 15990.53          | 955.9525                   | 5201.61           | 955.9454                   | 3386.151          | 955.9186                 | 3071.134          | 955.9808                 | 3824.1            |

|          |          |          |          |          |          |          |          |          |          |
|----------|----------|----------|----------|----------|----------|----------|----------|----------|----------|
| 955.8017 | 16018.19 | 955.8525 | 5094.044 | 955.8454 | 3357.613 | 955.8186 | 2989.911 | 955.8808 | 3848.248 |
| 955.7017 | 15879.89 | 955.7525 | 5176.365 | 955.7454 | 3378.467 | 955.7186 | 3059.061 | 955.7808 | 3813.124 |
| 955.6017 | 16250.23 | 955.6525 | 5263.077 | 955.6454 | 3385.053 | 955.6186 | 3150.163 | 955.6808 | 3850.443 |
| 955.5017 | 15932.14 | 955.5525 | 5197.22  | 955.5454 | 3389.444 | 955.5186 | 3143.577 | 955.5808 | 3814.222 |
| 955.4017 | 16058.15 | 955.4525 | 5168.682 | 955.4454 | 3259.925 | 955.4186 | 3102.965 | 955.4808 | 3923.983 |
| 955.3017 | 15732.37 | 955.3525 | 5090.751 | 955.3454 | 3330.172 | 955.3186 | 3006.375 | 955.3808 | 3920.69  |
| 955.2017 | 15965.95 | 955.2525 | 5207.098 | 955.2454 | 3437.739 | 955.2186 | 3028.327 | 955.2808 | 3847.15  |
| 955.1017 | 15987.46 | 955.1525 | 5201.61  | 955.1454 | 3392.736 | 955.1186 | 3037.108 | 955.1808 | 3948.131 |
| 955.0017 | 16095.03 | 955.0525 | 5261.979 | 955.0454 | 3433.348 | 955.0186 | 3053.572 | 955.0808 | 3943.74  |
| 954.9017 | 15776.94 | 954.9525 | 5348.691 | 954.9454 | 3472.862 | 954.9186 | 3042.596 | 954.9808 | 3899.836 |
| 954.8017 | 15629.42 | 954.8525 | 5216.977 | 954.8454 | 3371.882 | 954.8186 | 3121.625 | 954.8808 | 3869.102 |
| 954.7017 | 15753.89 | 954.7525 | 5283.932 | 954.7454 | 3424.567 | 954.7186 | 3123.82  | 954.7808 | 3911.91  |
| 954.6017 | 15812.28 | 954.6525 | 5332.227 | 954.6454 | 3379.565 | 954.6186 | 3045.889 | 954.6808 | 3833.979 |
| 954.5017 | 15867.6  | 954.5525 | 5312.47  | 954.5454 | 3486.034 | 954.5186 | 3073.33  | 954.5808 | 3910.812 |
| 954.4017 | 15899.87 | 954.4525 | 5389.303 | 954.4454 | 3499.205 | 954.4186 | 3084.306 | 954.4808 | 3937.155 |
| 954.3017 | 16004.36 | 954.3525 | 5433.208 | 954.3454 | 3465.179 | 954.3186 | 3038.206 | 954.3808 | 3925.081 |
| 954.2017 | 15915.24 | 954.2525 | 5439.793 | 954.2454 | 3433.348 | 954.2186 | 3098.575 | 954.2808 | 4010.695 |
| 954.1017 | 16041.24 | 954.1525 | 5406.865 | 954.1454 | 3443.227 | 954.1186 | 3108.453 | 954.1808 | 3922.886 |
| 954.0017 | 16150.35 | 954.0525 | 5435.403 | 954.0454 | 3422.372 | 954.0186 | 3042.596 | 954.0808 | 3917.398 |
| 953.9017 | 16084.27 | 953.9525 | 5539.677 | 953.9454 | 3434.446 | 953.9186 | 3100.77  | 953.9808 | 3992.036 |
| 953.8017 | 16293.26 | 953.8525 | 5614.315 | 953.8454 | 3532.134 | 953.8186 | 3046.987 | 953.8808 | 3897.641 |
| 953.7017 | 16546.81 | 953.7525 | 5562.727 | 953.7454 | 3478.351 | 953.7186 | 3039.303 | 953.7808 | 3877.883 |
| 953.6017 | 16834.16 | 953.6525 | 5524.31  | 953.6454 | 3454.203 | 953.6186 | 3023.937 | 953.6808 | 3897.641 |
| 953.5017 | 16918.68 | 953.5525 | 5660.415 | 953.5454 | 3460.789 | 953.5186 | 3022.839 | 953.5808 | 3917.398 |
| 953.4017 | 17350.48 | 953.4525 | 5679.074 | 953.4454 | 3447.617 | 953.4186 | 3018.449 | 953.4808 | 3933.862 |
| 953.3017 | 17576.37 | 953.3525 | 5616.51  | 953.3454 | 3437.739 | 953.3186 | 3049.182 | 953.3808 | 4022.769 |
| 953.2017 | 17631.69 | 953.2525 | 5405.767 | 953.2454 | 3543.11  | 953.2186 | 3088.696 | 953.2808 | 4033.745 |
| 953.1017 | 17756.16 | 953.1525 | 5493.577 | 953.1454 | 3505.791 | 953.1186 | 3149.065 | 953.1808 | 3996.426 |
| 953.0017 | 17510.3  | 953.0525 | 5454.062 | 953.0454 | 3533.231 | 953.0186 | 3139.187 | 953.0808 | 3994.231 |
| 952.9017 | 18108.06 | 952.9525 | 5433.208 | 952.9454 | 3532.134 | 952.9186 | 3156.749 | 952.9808 | 3982.157 |
| 952.8017 | 17605.57 | 952.8525 | 5369.546 | 952.8454 | 3424.567 | 952.8186 | 3147.968 | 952.8808 | 3989.84  |
| 952.7017 | 17508.76 | 952.7525 | 5277.346 | 952.7454 | 3539.817 | 952.7186 | 3020.644 | 952.7808 | 4068.869 |
| 952.6017 | 17459.59 | 952.6525 | 5251.003 | 952.6454 | 3502.498 | 952.6186 | 3120.527 | 952.6808 | 4052.405 |
| 952.5017 | 17368.92 | 952.5525 | 5400.279 | 952.5454 | 3476.155 | 952.5186 | 3099.672 | 952.5808 | 3954.717 |
| 952.4017 | 16957.1  | 952.4525 | 5285.029 | 952.4454 | 3393.834 | 952.4186 | 3133.699 | 952.4808 | 4013.988 |
| 952.3017 | 16743.5  | 952.3525 | 5286.127 | 952.3454 | 3486.034 | 952.3186 | 3064.549 | 952.3808 | 4004.109 |
| 952.2017 | 16294.79 | 952.2525 | 5208.196 | 952.2454 | 3443.227 | 952.2186 | 3062.353 | 952.2808 | 3959.107 |
| 952.1017 | 15781.55 | 952.1525 | 5201.61  | 952.1454 | 3367.491 | 952.1186 | 3023.937 | 952.1808 | 3892.152 |
| 952.0017 | 15752.35 | 952.0525 | 5128.07  | 952.0454 | 3407.005 | 952.0186 | 2995.399 | 952.0808 | 3857.029 |
| 951.9017 | 15535.68 | 951.9525 | 5155.51  | 951.9454 | 3410.298 | 951.9186 | 3042.596 | 951.9808 | 3865.81  |
| 951.8017 | 14937.92 | 951.8525 | 4955.744 | 951.8454 | 3462.984 | 951.8186 | 3010.765 | 951.8808 | 3883.371 |
| 951.7017 | 15016.29 | 951.7525 | 4989.77  | 951.7454 | 3344.441 | 951.7186 | 3097.477 | 951.7808 | 3850.443 |
| 951.6017 | 14879.53 | 951.6525 | 5088.556 | 951.6454 | 3380.663 | 951.6186 | 3129.308 | 951.6808 | 3964.595 |

|          |          |          |          |          |          |          |          |          |          |
|----------|----------|----------|----------|----------|----------|----------|----------|----------|----------|
| 951.5017 | 14698.2  | 951.5525 | 5056.725 | 951.5454 | 3355.417 | 951.5186 | 3062.353 | 951.5808 | 3882.274 |
| 951.4017 | 14407.77 | 951.4525 | 4928.304 | 951.4454 | 3343.344 | 951.4186 | 3136.991 | 951.4808 | 3786.781 |
| 951.3017 | 13943.7  | 951.3525 | 4988.673 | 951.3454 | 3370.784 | 951.3186 | 3104.063 | 951.3808 | 3852.638 |
| 951.2017 | 14134.24 | 951.2525 | 5097.337 | 951.2454 | 3419.079 | 951.2186 | 3030.523 | 951.2808 | 3839.467 |
| 951.1017 | 14188.03 | 951.1525 | 5049.041 | 951.1454 | 3322.489 | 951.1186 | 3017.351 | 951.1808 | 3906.421 |
| 951.0017 | 13876.08 | 951.0525 | 5078.677 | 951.0454 | 3278.584 | 951.0186 | 3073.33  | 951.0808 | 3891.055 |
| 950.9017 | 13785.42 | 950.9525 | 5055.627 | 950.9454 | 3344.441 | 950.9186 | 3108.453 | 950.9808 | 3894.348 |
| 950.8017 | 13770.05 | 950.8525 | 5060.018 | 950.8454 | 3326.879 | 950.8186 | 3141.382 | 950.8808 | 3960.205 |
| 950.7017 | 13542.63 | 950.7525 | 5069.896 | 950.7454 | 3282.975 | 950.7186 | 3117.234 | 950.7808 | 3876.786 |
| 950.6017 | 13591.8  | 950.6525 | 4994.161 | 950.6454 | 3311.513 | 950.6186 | 3021.742 | 950.6808 | 3917.398 |
| 950.5017 | 13647.12 | 950.5525 | 4930.499 | 950.5454 | 3354.32  | 950.5186 | 3051.377 | 950.5808 | 3848.248 |
| 950.4017 | 13368.98 | 950.4525 | 4909.644 | 950.4454 | 3277.486 | 950.4186 | 3053.572 | 950.4808 | 3839.467 |
| 950.3017 | 13249.12 | 950.3525 | 4950.256 | 950.3454 | 3377.37  | 950.3186 | 3121.625 | 950.3808 | 3833.979 |
| 950.2017 | 13550.31 | 950.2525 | 4983.184 | 950.2454 | 3378.467 | 950.2186 | 3104.063 | 950.2808 | 3817.514 |
| 950.1017 | 13553.38 | 950.1525 | 5020.503 | 950.1454 | 3371.882 | 950.1186 | 3111.746 | 950.1808 | 3819.71  |
| 950.0017 | 13562.6  | 950.0525 | 5018.308 | 950.0454 | 3312.61  | 950.0186 | 3056.865 | 950.0808 | 3904.226 |
| 935.9017 | 17241.38 | 935.9525 | 5083.068 | 935.9454 | 3362.003 | 935.9186 | 3098.575 | 935.9808 | 3880.079 |
| 935.8017 | 17287.48 | 935.8525 | 5182.951 | 935.8454 | 3321.391 | 935.8186 | 3055.768 | 935.8808 | 3868.005 |
| 935.7017 | 17218.33 | 935.7525 | 5184.048 | 935.7454 | 3262.12  | 935.7186 | 3040.401 | 935.7808 | 4003.012 |
| 935.6017 | 17318.21 | 935.6525 | 5210.391 | 935.6454 | 3343.344 | 935.6186 | 3118.332 | 935.6808 | 4042.526 |
| 935.5017 | 17442.68 | 935.5525 | 5320.153 | 935.5454 | 3324.684 | 935.5186 | 3205.044 | 935.5808 | 3909.714 |
| 935.4017 | 17103.08 | 935.4525 | 5306.982 | 935.4454 | 3367.491 | 935.4186 | 3100.77  | 935.4808 | 3936.057 |
| 935.3017 | 16960.17 | 935.3525 | 5279.541 | 935.3454 | 3363.101 | 935.3186 | 3161.139 | 935.3808 | 3885.567 |
| 935.2017 | 17156.86 | 935.2525 | 5400.279 | 935.2454 | 3402.615 | 935.2186 | 3126.015 | 935.2808 | 3873.493 |
| 935.1017 | 17202.96 | 935.1525 | 5467.234 | 935.1454 | 3453.105 | 935.1186 | 3179.799 | 935.1808 | 3919.593 |
| 935.0017 | 16821.87 | 935.0525 | 5492.479 | 935.0454 | 3479.448 | 935.0186 | 3168.822 | 935.0808 | 4056.795 |
| 934.9017 | 16706.62 | 934.9525 | 5519.919 | 934.9454 | 3436.641 | 934.9186 | 3134.796 | 934.9808 | 3977.767 |
| 934.8017 | 16746.57 | 934.8525 | 5667     | 934.8454 | 3393.834 | 934.8186 | 3084.306 | 934.8808 | 3943.74  |
| 934.7017 | 16543.73 | 934.7525 | 5645.048 | 934.7454 | 3495.912 | 934.7186 | 3104.063 | 934.7808 | 3943.74  |
| 934.6017 | 16460.75 | 934.6525 | 5632.974 | 934.6454 | 3458.593 | 934.6186 | 3172.115 | 934.6808 | 3995.328 |
| 934.5017 | 16654.37 | 934.5525 | 5519.919 | 934.5454 | 3542.012 | 934.5186 | 3195.165 | 934.5808 | 4133.628 |
| 934.4017 | 16835.7  | 934.4525 | 5690.05  | 934.4454 | 3551.891 | 934.4186 | 3140.284 | 934.4808 | 4073.259 |
| 934.3017 | 17136.89 | 934.3525 | 5747.126 | 934.3454 | 3490.424 | 934.3186 | 3119.43  | 934.3808 | 4051.307 |
| 934.2017 | 17212.18 | 934.2525 | 5910.671 | 934.2454 | 3509.084 | 934.2186 | 3180.896 | 934.2808 | 4142.409 |
| 934.1017 | 17688.55 | 934.1525 | 6037.995 | 934.1454 | 3618.846 | 934.1186 | 3192.97  | 934.1808 | 4134.726 |
| 934.0017 | 18103.45 | 934.0525 | 6186.173 | 934.0454 | 3604.577 | 934.0186 | 3246.753 | 934.0808 | 4095.212 |
| 933.9017 | 18698.14 | 933.9525 | 6128     | 933.9454 | 3742.876 | 933.9186 | 3304.927 | 933.9808 | 4091.919 |
| 933.8017 | 19581.72 | 933.8525 | 6216.907 | 933.8454 | 3608.967 | 933.8186 | 3176.506 | 933.8808 | 4141.312 |
| 933.7017 | 20201    | 933.7525 | 6114.828 | 933.7454 | 3668.238 | 933.7186 | 3123.82  | 933.7808 | 4112.774 |
| 933.6017 | 20981.62 | 933.6525 | 6354.109 | 933.6454 | 3704.46  | 933.6186 | 3258.827 | 933.6808 | 4186.314 |
| 933.5017 | 21227.49 | 933.5525 | 6349.718 | 933.5454 | 3741.779 | 933.5186 | 3198.458 | 933.5808 | 4266.44  |
| 933.4017 | 21892.86 | 933.4525 | 6272.885 | 933.4454 | 3709.948 | 933.4186 | 3226.996 | 933.4808 | 4271.928 |
| 933.3017 | 22272.42 | 933.3525 | 6258.616 | 933.3454 | 3662.75  | 933.3186 | 3192.97  | 933.3808 | 4254.366 |

|          |          |          |          |          |          |          |          |          |          |
|----------|----------|----------|----------|----------|----------|----------|----------|----------|----------|
| 933.2017 | 22673.49 | 933.2525 | 6130.195 | 933.2454 | 3719.826 | 933.2186 | 3248.948 | 933.2808 | 4243.39  |
| 933.1017 | 22544.41 | 933.1525 | 6010.555 | 933.1454 | 3821.905 | 933.1186 | 3220.41  | 933.1808 | 4318.028 |
| 933.0017 | 22602.8  | 933.0525 | 5782.25  | 933.0454 | 3712.143 | 933.0186 | 3239.07  | 933.0808 | 4243.39  |
| 932.9017 | 22229.39 | 932.9525 | 5660.415 | 932.9454 | 3622.138 | 932.9186 | 3184.189 | 932.9808 | 4301.564 |
| 932.8017 | 21703.85 | 932.8525 | 5572.605 | 932.8454 | 3646.286 | 932.8186 | 3190.775 | 932.8808 | 4224.731 |
| 932.7017 | 21046.16 | 932.7525 | 5521.017 | 932.7454 | 3692.386 | 932.7186 | 3334.563 | 932.7808 | 4207.169 |
| 932.6017 | 20492.96 | 932.6525 | 5366.253 | 932.6454 | 3547.5   | 932.6186 | 3217.118 | 932.6808 | 4204.973 |
| 932.5017 | 19819.9  | 932.5525 | 5188.439 | 932.5454 | 3641.896 | 932.5186 | 3095.282 | 932.5808 | 4110.578 |
| 932.4017 | 18782.65 | 932.4525 | 5241.125 | 932.4454 | 3491.522 | 932.4186 | 3200.653 | 932.4808 | 4031.55  |
| 932.3017 | 17768.46 | 932.3525 | 5189.537 | 932.3454 | 3528.841 | 932.3186 | 3154.553 | 932.3808 | 4097.407 |
| 932.2017 | 17090.79 | 932.2525 | 5054.53  | 932.2454 | 3549.696 | 932.2186 | 3222.606 | 932.2808 | 3973.376 |
| 932.1017 | 16383.92 | 932.1525 | 5034.772 | 932.1454 | 3477.253 | 932.1186 | 3226.996 | 932.1808 | 4114.969 |
| 932.0017 | 15895.26 | 932.0525 | 4968.915 | 932.0454 | 3415.786 | 932.0186 | 3189.677 | 932.0808 | 4083.138 |
| 931.9017 | 15206.83 | 931.9525 | 5031.48  | 931.9454 | 3338.953 | 931.9186 | 3190.775 | 931.9808 | 4038.136 |
| 931.8017 | 14587.56 | 931.8525 | 4999.649 | 931.8454 | 3417.982 | 931.8186 | 3207.239 | 931.8808 | 3920.69  |
| 931.7017 | 13900.67 | 931.7525 | 4987.575 | 931.7454 | 3362.003 | 931.7186 | 3206.141 | 931.7808 | 3990.938 |
| 931.6017 | 13708.59 | 931.6525 | 5036.968 | 931.6454 | 3419.079 | 931.6186 | 3174.31  | 931.6808 | 3973.376 |
| 931.5017 | 13310.59 | 931.5525 | 4884.399 | 931.5454 | 3495.912 | 931.5186 | 3138.089 | 931.5808 | 3949.229 |
| 931.4017 | 13310.59 | 931.4525 | 4829.518 | 931.4454 | 3405.908 | 931.4186 | 3186.384 | 931.4808 | 3854.833 |
| 931.3017 | 13150.78 | 931.3525 | 4957.939 | 931.3454 | 3388.346 | 931.3186 | 3214.922 | 931.3808 | 4001.914 |
| 931.2017 | 12780.44 | 931.2525 | 4932.694 | 931.2454 | 3386.151 | 931.2186 | 3181.994 | 931.2808 | 3949.229 |
| 931.1017 | 12880.32 | 931.1525 | 4954.646 | 931.1454 | 3347.734 | 931.1186 | 3176.506 | 931.1808 | 4027.159 |
| 931.0017 | 12553.01 | 931.0525 | 4921.718 | 931.0454 | 3393.834 | 931.0186 | 3213.825 | 931.0808 | 3993.133 |
| 930.9017 | 12466.96 | 930.9525 | 4892.082 | 930.9454 | 3488.229 | 930.9186 | 3267.608 | 930.9808 | 3999.719 |
| 930.8017 | 12423.93 | 930.8525 | 4908.546 | 930.8454 | 3389.444 | 930.8186 | 3202.848 | 930.8808 | 4007.402 |
| 930.7017 | 12301    | 930.7525 | 5024.894 | 930.7454 | 3293.951 | 930.7186 | 3210.532 | 930.7808 | 4056.795 |
| 930.6017 | 12383.98 | 930.6525 | 4839.397 | 930.6454 | 3412.493 | 930.6186 | 3190.775 | 930.6808 | 3945.936 |
| 930.5017 | 12402.42 | 930.5525 | 4926.108 | 930.5454 | 3368.589 | 930.5186 | 3194.068 | 930.5808 | 4023.867 |
| 930.4017 | 12396.27 | 930.4525 | 5008.43  | 930.4454 | 3367.491 | 930.4186 | 3188.579 | 930.4808 | 3915.202 |
| 930.3017 | 12313.3  | 930.3525 | 4914.035 | 930.3454 | 3443.227 | 930.3186 | 3192.97  | 930.3808 | 3929.471 |
| 930.2017 | 12328.66 | 930.2525 | 4942.573 | 930.2454 | 3345.539 | 930.2186 | 3116.137 | 930.2808 | 3928.374 |
| 930.1017 | 12271.81 | 930.1525 | 4949.158 | 930.1454 | 3323.586 | 930.1186 | 3093.087 | 930.1808 | 3847.15  |
| 930.0017 | 12161.17 | 930.0525 | 4909.644 | 930.0454 | 3347.734 | 930.0186 | 3048.084 | 930.0808 | 3992.036 |

### 5.3 DFT calculations

All the calculations were performed using Gaussian 16 software packages.<sup>2</sup> The geometry of all reactants and transition states were optimized using the (U)B3LYP<sup>3</sup>-D3(Becke-Johnson damping function)<sup>4</sup> in water (using SMD solvation model<sup>5</sup>). In these geometry optimizations, a basis set of SDD<sup>6</sup> for Cu, while 6-31G(d)<sup>7</sup> for all the other atoms was used. Vibrational frequency analysis was calculated at the same level of theory to validate each structure as either a minimum or a transition state and to evaluate its zero-point energy and thermal corrections at 298 K. For each transition state, the intrinsic reaction coordinate (IRC) analysis was conducted to ensure that it connects the right reactant and product.<sup>8</sup> To obtain more accurate energies, solution-phase single point energy calculations were performed at the (U)B3LYP-D3(BJ)/6-311+G(d,p)-SDD level.

**Table S5: Thermal correction of Gibbs free energy (TCG, hartree) and single point energies (SP, hartree) in water for all species involved in this study**

| Compounds    | TCG      | SP           | Compound<br>ds | TCG      | SP          |
|--------------|----------|--------------|----------------|----------|-------------|
| <b>Int-I</b> | 0.365206 | -1668.601983 | <b>(S)-3a</b>  | 0.363582 | 1264.461732 |
| <b>1a</b>    | 0.241559 | -900.488349  | <b>Int-IV</b>  | 0.753729 | 2933.093944 |
| <b>2a</b>    | 0.099816 | -363.952075  | <b>TS-II</b>   | 0.757059 | 2933.058156 |

|                |          |              |               |          |             |
|----------------|----------|--------------|---------------|----------|-------------|
| <b>Int-II</b>  | 0.754124 | -2933.090446 | <b>Int-V</b>  | 0.757316 | 2933.070396 |
| <b>TS-I</b>    | 0.755729 | -2933.057242 | <b>(R)-3a</b> | 0.363578 | 1264.461732 |
| <b>Int-III</b> | 0.756902 | -2933.069683 |               |          |             |

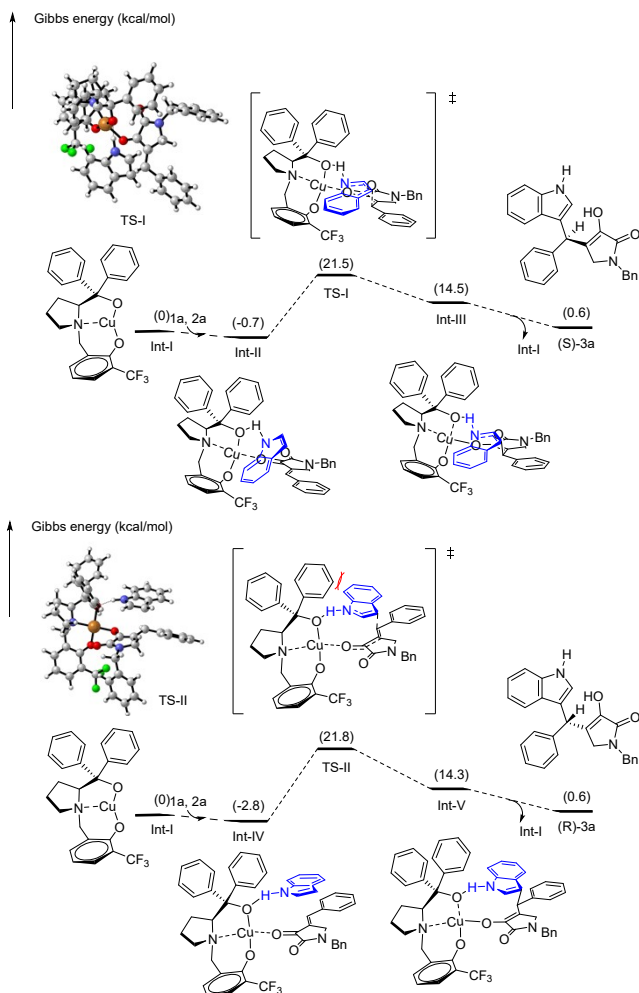

**Scheme S2:** Gibbs energy profiles for the copper-catalyzed enantioselective of **1a** with **2a**. Gibbs energies in solution (in kcal/mol).



**1a**

|   |             |             |             |
|---|-------------|-------------|-------------|
| C | 0.03581200  | 0.28220200  | -0.76126900 |
| H | 0.43145400  | -0.00466900 | -1.74211700 |
| H | -0.17040700 | -0.63579500 | -0.19839200 |
| C | 0.18507000  | 2.44657300  | 0.26287000  |
| C | -1.21314200 | 2.24840100  | -0.32049900 |
| O | 0.53025400  | 3.46654700  | 0.85342000  |
| O | -2.14796900 | 3.05275400  | -0.23812000 |
| C | 0.93993500  | 1.22773500  | -0.01594900 |
| C | 2.23107400  | 1.09600400  | 0.37192400  |
| H | 2.64116200  | 1.96066000  | 0.89259800  |
| C | 3.15873400  | -0.00567700 | 0.19908500  |
| C | 4.48095000  | 0.18125000  | 0.65549300  |
| C | 2.82067800  | -1.24155500 | -0.39344900 |
| C | 5.43438100  | -0.82180100 | 0.51882700  |
| H | 4.74798200  | 1.12801300  | 1.11628500  |
| C | 3.77662100  | -2.24280600 | -0.52581600 |
| H | 1.81449900  | -1.42837600 | -0.74493900 |
| C | 5.08424200  | -2.03766300 | -0.07383000 |
| H | 6.44736600  | -0.65853800 | 0.87355900  |
| H | 3.50237500  | -3.18875700 | -0.98267500 |
| H | 5.82542500  | -2.82388000 | -0.18186000 |
| N | -1.20580700 | 1.04520700  | -0.92997300 |
| C | -2.39614400 | 0.41717100  | -1.49608400 |
| H | -3.10104300 | 1.22221800  | -1.71481800 |
| H | -2.11312500 | -0.06149400 | -2.43772900 |
| C | -3.00141900 | -0.59470500 | -0.54766000 |
| C | -3.65233600 | -0.16224900 | 0.61587000  |

|   |             |             |             |
|---|-------------|-------------|-------------|
| C | -2.88557600 | -1.96526500 | -0.79737000 |
| C | -4.18340500 | -1.08914100 | 1.51147600  |
| H | -3.73749700 | 0.90273900  | 0.81438100  |
| C | -3.41895900 | -2.89563100 | 0.09845600  |
| H | -2.37749800 | -2.30278900 | -1.69694100 |
| C | -4.06824800 | -2.45893500 | 1.25392900  |
| H | -4.68954000 | -0.74490800 | 2.40886100  |
| H | -3.32485300 | -3.95822600 | -0.10639800 |
| H | -4.48352800 | -3.18050300 | 1.95156100  |

**2a**

|   |             |             |             |
|---|-------------|-------------|-------------|
| C | 0.25011100  | -0.67172200 | 0.00035300  |
| C | 0.24889200  | 0.75533300  | 0.00029200  |
| C | -0.98566000 | 1.43062900  | 0.00012600  |
| C | -2.16139100 | 0.68920200  | -0.00016000 |
| C | -2.13454200 | -0.72250900 | -0.00018000 |
| C | -0.93148000 | -1.42067000 | 0.00009800  |
| C | 2.38882100  | 0.02965400  | -0.00022800 |
| C | 1.62518100  | 1.17082500  | -0.00015500 |
| H | -1.01659000 | 2.51705000  | 0.00024600  |
| H | -3.11950400 | 1.20136600  | -0.00044500 |
| H | -3.07045200 | -1.27386900 | -0.00054600 |
| H | -0.90607200 | -2.50653100 | 0.00019600  |
| H | 1.88223800  | -2.03989500 | -0.00077200 |
| H | 3.46291300  | -0.09077900 | -0.00061300 |
| H | 1.99725700  | 2.18629600  | 0.00002200  |
| N | 1.56723100  | -1.07972600 | 0.00014700  |

**Int-I**

|   |            |            |            |
|---|------------|------------|------------|
| C | 0.20976800 | 0.42030700 | 1.82506700 |
|---|------------|------------|------------|

|   |             |             |             |
|---|-------------|-------------|-------------|
| C | -1.37037600 | -1.03397300 | 0.74890400  |
| C | -1.78919600 | -0.96396900 | 2.22684200  |
| C | -0.89185600 | 0.12138100  | 2.86568700  |
| H | 1.21855300  | 0.36910700  | 2.23500100  |
| H | 0.07503400  | 1.40430700  | 1.37967200  |
| H | -1.39043600 | -2.05592500 | 0.36721300  |
| H | -2.85104700 | -0.74767800 | 2.34600800  |
| H | -1.60179500 | -1.93621700 | 2.69186300  |
| H | -1.45828700 | 1.03062300  | 3.07963400  |
| H | -0.46067100 | -0.23323700 | 3.80527200  |
| N | 0.07074500  | -0.61131500 | 0.75234800  |
| C | 0.99048000  | -1.77013500 | 0.96341500  |
| H | 0.75129400  | -2.26529700 | 1.91202600  |
| H | 0.78126000  | -2.48022400 | 0.15586800  |
| C | 2.44306400  | -1.36401800 | 0.96494800  |
| C | 3.00067300  | -0.58678000 | -0.08987600 |
| C | 3.25667400  | -1.76971000 | 2.02421100  |
| C | 4.37974700  | -0.26044000 | -0.00791800 |
| C | 4.61597000  | -1.45491200 | 2.08044600  |
| H | 2.80684800  | -2.35038000 | 2.82575100  |
| C | 5.17215000  | -0.69387100 | 1.05696200  |
| H | 5.22544200  | -1.78855600 | 2.91364100  |
| H | 6.22226400  | -0.42521800 | 1.08351400  |
| O | 2.30539100  | -0.15663600 | -1.13748800 |
| C | 4.97316800  | 0.58250200  | -1.09015100 |
| F | 4.37655500  | 1.80136200  | -1.19111400 |
| F | 4.87482000  | 0.01415700  | -2.32071500 |
| F | 6.29189100  | 0.82469300  | -0.89107100 |

|    |             |             |             |
|----|-------------|-------------|-------------|
| C  | -2.16125500 | -0.17655400 | -0.29827600 |
| C  | -2.42414100 | 1.26134100  | 0.19951800  |
| C  | -1.62170200 | 2.32406500  | -0.23194400 |
| C  | -3.47396600 | 1.54325200  | 1.08660700  |
| C  | -1.83196700 | 3.62287700  | 0.23715800  |
| H  | -0.81829000 | 2.13173700  | -0.93481900 |
| C  | -3.68756900 | 2.83840800  | 1.55979100  |
| H  | -4.14065800 | 0.74726500  | 1.40129900  |
| C  | -2.86231800 | 3.88534400  | 1.14121200  |
| H  | -1.19092200 | 4.42901400  | -0.10928800 |
| H  | -4.50544000 | 3.03017400  | 2.24874700  |
| H  | -3.02909600 | 4.89487200  | 1.50580400  |
| C  | -3.51260600 | -0.82586400 | -0.64079500 |
| C  | -4.27409700 | -0.21874300 | -1.65317600 |
| C  | -4.01704200 | -1.98034000 | -0.03354000 |
| C  | -5.49628400 | -0.75188800 | -2.05323000 |
| H  | -3.89953600 | 0.68398600  | -2.12619000 |
| C  | -5.24869100 | -2.51600400 | -0.42943700 |
| H  | -3.46819100 | -2.47974700 | 0.75640600  |
| C  | -5.99145700 | -1.90763100 | -1.43938700 |
| H  | -6.06532400 | -0.26536400 | -2.84064500 |
| H  | -5.62201400 | -3.41200700 | 0.05851600  |
| H  | -6.94648500 | -2.32456000 | -1.74587200 |
| O  | -1.39874800 | -0.16674300 | -1.48937000 |
| Cu | 0.42781700  | -0.09655900 | -1.16252200 |

**Int-II**

|   |             |             |             |
|---|-------------|-------------|-------------|
| C | -4.15800000 | -1.25649500 | -0.46776200 |
| C | -2.29580500 | -2.59990800 | 0.15288000  |

|   |             |             |             |
|---|-------------|-------------|-------------|
| C | -3.42146700 | -3.59042700 | -0.18093500 |
| C | -4.55114200 | -2.71912800 | -0.78317800 |
| H | -4.96561600 | -0.67562700 | -0.02340400 |
| H | -3.82127900 | -0.73564800 | -1.36131700 |
| H | -1.74350800 | -2.88034000 | 1.04979100  |
| H | -3.09407100 | -4.38019100 | -0.85716000 |
| H | -3.75795500 | -4.07277500 | 0.74125300  |
| H | -4.63100200 | -2.86015600 | -1.86372900 |
| H | -5.51761000 | -2.97215400 | -0.33974800 |
| N | -3.01916100 | -1.33200100 | 0.49534400  |
| C | -3.51201700 | -1.34734700 | 1.91177900  |
| H | -4.15975000 | -2.21528300 | 2.07839500  |
| H | -2.62655400 | -1.46237900 | 2.54625000  |
| C | -4.26838100 | -0.08714400 | 2.23884700  |
| C | -3.65150300 | 1.17739800  | 2.03631800  |
| C | -5.58536100 | -0.14726100 | 2.69263400  |
| C | -4.43220900 | 2.34032900  | 2.26308700  |
| C | -6.32682700 | 1.00808200  | 2.95935700  |
| H | -6.04130800 | -1.12434100 | 2.83388800  |
| C | -5.74676100 | 2.25236100  | 2.72740900  |
| H | -7.34781200 | 0.93628900  | 3.31922900  |
| H | -6.31502700 | 3.16067800  | 2.89586300  |
| O | -2.39269200 | 1.30533300  | 1.65564200  |
| C | -3.82395500 | 3.66757500  | 1.94657100  |
| F | -3.44098900 | 3.76314500  | 0.63950700  |
| F | -2.71371000 | 3.94185500  | 2.67982100  |
| F | -4.68152100 | 4.69423100  | 2.16122200  |
| C | -1.22139700 | -2.32964900 | -0.96329600 |

|    |             |             |             |
|----|-------------|-------------|-------------|
| C  | -1.81128600 | -2.32780400 | -2.39031900 |
| C  | -2.05189900 | -3.52258100 | -3.08445000 |
| C  | -2.09616700 | -1.11924300 | -3.03652300 |
| C  | -2.60274500 | -3.51120000 | -4.36663000 |
| H  | -1.79380700 | -4.47193700 | -2.62677500 |
| C  | -2.64297800 | -1.10183200 | -4.32132800 |
| H  | -1.89082000 | -0.18472400 | -2.52930300 |
| H  | -2.78422200 | -4.45056900 | -4.88151400 |
| H  | -2.85781400 | -0.15007400 | -4.79972000 |
| C  | -0.10519700 | -3.39488700 | -0.91066500 |
| C  | 0.99643100  | -3.20603800 | -1.76254900 |
| C  | -0.10178100 | -4.50883100 | -0.06584100 |
| C  | 2.07419100  | -4.08693200 | -1.75630100 |
| H  | 1.00160500  | -2.36160100 | -2.44418500 |
| C  | 0.97959600  | -5.39932000 | -0.05787800 |
| H  | -0.93713800 | -4.71033300 | 0.59484000  |
| H  | 2.91519000  | -3.91428300 | -2.42218900 |
| H  | 0.95832900  | -6.25701900 | 0.60864200  |
| O  | -0.61816000 | -1.08672200 | -0.69187700 |
| Cu | -1.51927600 | 0.03951300  | 0.52602200  |
| C  | 3.61562700  | -0.02192900 | 0.32452400  |
| H  | 3.93578300  | -0.21877500 | -0.70454700 |
| H  | 4.50769700  | 0.15625500  | 0.93542400  |
| C  | 1.37244800  | 0.54353300  | 0.88844500  |
| C  | 1.63162400  | -0.90719300 | 1.26623900  |
| O  | 0.27288300  | 1.10762800  | 1.02007400  |
| O  | 0.86024900  | -1.65508000 | 1.87960000  |
| C  | 2.61139400  | 1.09825900  | 0.40501400  |

|   |             |             |             |
|---|-------------|-------------|-------------|
| C | 2.71744900  | 2.42030200  | 0.09926700  |
| H | 1.81347900  | 3.00125600  | 0.27051200  |
| C | 3.84359300  | 3.18352800  | -0.39024800 |
| C | 3.67078500  | 4.57892900  | -0.51703900 |
| C | 5.08042800  | 2.61840500  | -0.77067900 |
| C | 4.69529500  | 5.38415700  | -1.00316700 |
| H | 2.71822900  | 5.01661300  | -0.23584300 |
| C | 6.10043300  | 3.42682700  | -1.25870300 |
| H | 5.24476800  | 1.55131600  | -0.70018000 |
| C | 5.91285000  | 4.80911400  | -1.37674800 |
| H | 4.54550900  | 6.45539600  | -1.09499400 |
| H | 7.04542200  | 2.98042600  | -1.55237400 |
| H | 6.71409200  | 5.43365500  | -1.76026100 |
| N | 2.88232000  | -1.17953200 | 0.84625400  |
| C | 0.46996800  | 1.86325700  | -2.25074200 |
| C | 1.51319700  | 2.63337300  | -2.85140800 |
| C | 1.38345000  | 4.03354800  | -2.89326200 |
| C | 0.25559500  | 4.62489900  | -2.33245200 |
| C | -0.76429900 | 3.84506000  | -1.74079900 |
| C | -0.67633800 | 2.45730700  | -1.70309700 |
| C | 2.08717900  | 0.44776500  | -2.88651700 |
| C | 2.52981600  | 1.69841100  | -3.25335500 |
| H | 2.16444400  | 4.64528400  | -3.33627600 |
| H | 0.15358700  | 5.70652000  | -2.34770300 |
| H | -1.62976800 | 4.33399200  | -1.30233800 |
| H | -1.46161400 | 1.85609900  | -1.25289400 |
| H | 0.32750800  | -0.21253200 | -1.81491800 |
| H | 2.56086200  | -0.51810700 | -2.99795600 |

|   |             |             |             |
|---|-------------|-------------|-------------|
| H | 3.47247900  | 1.93003700  | -3.73015100 |
| N | 0.84053400  | 0.54050200  | -2.30564300 |
| C | 2.07225200  | -5.19145800 | -0.89705900 |
| H | 2.91172900  | -5.88055800 | -0.88734500 |
| C | -2.90620400 | -2.29844700 | -4.99035800 |
| H | -3.32998400 | -2.28703300 | -5.99045500 |
| C | 3.54190000  | -2.46435000 | 1.05893000  |
| H | 2.75152400  | -3.20362600 | 1.19985400  |
| H | 4.08806300  | -2.71541900 | 0.14592600  |
| C | 4.47513200  | -2.42592200 | 2.24864200  |
| C | 3.95355600  | -2.44579500 | 3.54961100  |
| C | 5.85856800  | -2.33104200 | 2.06729600  |
| C | 4.80559500  | -2.37613200 | 4.65132900  |
| H | 2.87843000  | -2.51399300 | 3.69100000  |
| C | 6.71388500  | -2.26188600 | 3.17028400  |
| H | 6.26432700  | -2.31410900 | 1.05917000  |
| C | 6.18857000  | -2.28430300 | 4.46351500  |
| H | 4.39304300  | -2.39635500 | 5.65598600  |
| H | 7.78704800  | -2.19052600 | 3.01830000  |
| H | 6.85188600  | -2.23199000 | 5.32204300  |

**TS-I**

|   |            |            |             |
|---|------------|------------|-------------|
| C | 3.98713600 | 1.50403400 | -0.14252700 |
| C | 1.97764100 | 2.58012500 | 0.52329100  |
| C | 3.04052000 | 3.69064300 | 0.47380400  |
| C | 4.27858900 | 3.02319300 | -0.17311700 |
| H | 4.80542400 | 0.91171000 | 0.26694300  |
| H | 3.76255100 | 1.12421100 | -1.13757800 |
| H | 1.33087500 | 2.66123400 | 1.39689800  |



|   |            |             |             |
|---|------------|-------------|-------------|
| H | 2.70414400 | 4.56852100  | -0.07716900 |
| H | 3.26677800 | 4.01512600  | 1.49356000  |
| H | 4.41846600 | 3.35799100  | -1.20411600 |
| H | 5.18822100 | 3.26376500  | 0.38324100  |
| N | 2.77746900 | 1.32795000  | 0.71191400  |
| C | 3.14624000 | 1.15079100  | 2.15284700  |
| H | 3.66665400 | 2.04032600  | 2.52525500  |
| H | 2.20160900 | 1.06343600  | 2.70098100  |
| C | 4.01423200 | -0.05910600 | 2.36764000  |
| C | 3.58604700 | -1.33330100 | 1.90075600  |
| C | 5.24514300 | 0.06592300  | 3.01011400  |
| C | 4.45943700 | -2.43570200 | 2.10590100  |
| C | 6.08150400 | -1.03352400 | 3.22662900  |
| H | 5.55481300 | 1.05230500  | 3.34757100  |
| C | 5.68233300 | -2.28418900 | 2.76397300  |
| H | 7.03223000 | -0.91188600 | 3.73501800  |
| H | 6.32222100 | -3.14852900 | 2.90457800  |
| O | 2.42623300 | -1.52687200 | 1.30512300  |
| C | 4.04828700 | -3.76871300 | 1.57390400  |
| F | 3.87198200 | -3.76045400 | 0.22149000  |
| F | 2.87707800 | -4.21859300 | 2.09709300  |
| F | 4.96755400 | -4.73311300 | 1.82495700  |
| C | 1.02418100 | 2.44591900  | -0.72484200 |
| C | 1.69578300 | 2.87494500  | -2.04995300 |
| C | 1.78063700 | 4.22372000  | -2.42731800 |
| C | 2.22446800 | 1.91538000  | -2.92026100 |
| C | 2.41104100 | 4.60148300  | -3.61356700 |
| H | 1.34140300 | 4.98858000  | -1.79554800 |

|    |             |             |             |
|----|-------------|-------------|-------------|
| C  | 2.85155000  | 2.28612500  | -4.11147700 |
| H  | 2.15218400  | 0.86797500  | -2.66047900 |
| H  | 2.46758100  | 5.65347300  | -3.87916900 |
| H  | 3.25651700  | 1.51855300  | -4.76537600 |
| C  | -0.22384800 | 3.33417000  | -0.53405300 |
| C  | -1.31472900 | 3.11055800  | -1.38956700 |
| C  | -0.32343500 | 4.36605500  | 0.40510500  |
| C  | -2.46746800 | 3.88771400  | -1.30863400 |
| H  | -1.25391900 | 2.32506000  | -2.13509400 |
| C  | -1.48056300 | 5.15026300  | 0.49017900  |
| H  | 0.49865600  | 4.58510000  | 1.07710300  |
| H  | -3.29696200 | 3.69220700  | -1.98268100 |
| H  | -1.53220400 | 5.94637600  | 1.22767400  |
| O  | 0.59896400  | 1.10910400  | -0.81250300 |
| Cu | 1.43085500  | -0.16970100 | 0.36012200  |
| C  | -3.49212400 | 0.05361700  | 0.01357400  |
| H  | -3.71957400 | 0.61674100  | -0.90231900 |
| H  | -4.44446900 | -0.29231800 | 0.43361000  |
| C  | -1.33701000 | -0.76573100 | 0.47367200  |
| C  | -1.58105200 | 0.48689000  | 1.28194000  |
| O  | -0.20408700 | -1.38967600 | 0.53111100  |
| O  | -0.80136300 | 0.99951800  | 2.10616400  |
| C  | -2.49642300 | -1.05547300 | -0.21589600 |
| C  | -2.69760000 | -2.21162400 | -1.06482000 |
| H  | -2.00248900 | -3.00723100 | -0.81144000 |
| C  | -4.07825200 | -2.72609400 | -1.28258100 |
| C  | -4.34807900 | -4.06732400 | -0.97223500 |
| C  | -5.11642700 | -1.92408600 | -1.78443600 |

|   |             |             |             |
|---|-------------|-------------|-------------|
| C | -5.63320400 | -4.58878200 | -1.12792800 |
| H | -3.54621400 | -4.69749500 | -0.59770800 |
| C | -6.39749800 | -2.44763000 | -1.94658600 |
| H | -4.91590400 | -0.89726600 | -2.07260300 |
| C | -6.66221100 | -3.77973000 | -1.61330300 |
| H | -5.82744100 | -5.62681100 | -0.87432800 |
| H | -7.19012300 | -1.81657700 | -2.33775300 |
| H | -7.66205300 | -4.18448100 | -1.73920300 |
| N | -2.81399900 | 0.92980400  | 0.96004300  |
| C | 0.24312100  | -1.71193100 | -2.61447200 |
| C | -0.72740000 | -2.69996000 | -2.86926600 |
| C | -0.35351100 | -4.04276300 | -2.88315900 |
| C | 0.98724900  | -4.35910900 | -2.63932300 |
| C | 1.93628800  | -3.35967400 | -2.37216100 |
| C | 1.57626300  | -2.00908700 | -2.35503100 |
| C | -1.69137400 | -0.61424700 | -2.88627600 |
| C | -2.02823600 | -2.00879200 | -2.91878900 |
| H | -1.08534400 | -4.82365800 | -3.06517300 |
| H | 1.30022800  | -5.39871500 | -2.64974600 |
| H | 2.96483700  | -3.63814600 | -2.17041400 |
| H | 2.30180800  | -1.23306100 | -2.13665600 |
| H | 0.01706800  | 0.37633300  | -2.13204400 |
| H | -2.36434700 | 0.23260700  | -2.89299900 |
| H | -2.87138900 | -2.37805800 | -3.48636600 |
| N | -0.40397200 | -0.45872200 | -2.63121700 |
| C | -2.55583300 | 4.91660500  | -0.36480400 |
| H | -3.45317800 | 5.52489600  | -0.29851400 |
| C | 2.95473300  | 3.63328300  | -4.46138700 |

|   |             |            |             |
|---|-------------|------------|-------------|
| H | 3.44197900  | 3.92519700 | -5.38727000 |
| C | -3.47437700 | 2.06967600 | 1.57800600  |
| H | -2.68747200 | 2.70759800 | 1.98685900  |
| H | -3.99068000 | 2.63073000 | 0.79540500  |
| C | -4.44730700 | 1.64598100 | 2.65716600  |
| C | -3.96965900 | 1.14679100 | 3.87708900  |
| C | -5.82719800 | 1.70882800 | 2.43966800  |
| C | -4.85943500 | 0.72133000 | 4.86280500  |
| H | -2.89742700 | 1.09231600 | 4.04580400  |
| C | -6.72126400 | 1.28371400 | 3.42646000  |
| H | -6.20073700 | 2.09342800 | 1.49407500  |
| C | -6.23875500 | 0.78938600 | 4.63944900  |
| H | -4.47932100 | 0.33931400 | 5.80605200  |
| H | -7.79116800 | 1.33789600 | 3.24620900  |
| H | -6.93151200 | 0.45872600 | 5.40796500  |

**Int-III**

|   |            |            |             |
|---|------------|------------|-------------|
| C | 4.05741300 | 1.37930000 | 0.02942000  |
| C | 2.10584500 | 2.47906700 | 0.79520200  |
| C | 3.22610900 | 3.52690200 | 0.89791800  |
| C | 4.43975800 | 2.86997700 | 0.19452200  |
| H | 4.83515000 | 0.68952700 | 0.35745200  |
| H | 3.81428100 | 1.14507500 | -1.00558200 |
| H | 1.44048300 | 2.49437200 | 1.65824600  |
| H | 2.94962600 | 4.48171100 | 0.45176300  |
| H | 3.44636600 | 3.71431800 | 1.95268900  |
| H | 4.62658000 | 3.32101300 | -0.78338000 |
| H | 5.34695100 | 2.98230600 | 0.79389600  |
| N | 2.83354200 | 1.17167900 | 0.85477900  |

|   |             |             |             |
|---|-------------|-------------|-------------|
| C | 3.18273900  | 0.83134800  | 2.27086800  |
| H | 3.74920100  | 1.64788500  | 2.73186600  |
| H | 2.23100300  | 0.74130900  | 2.80652900  |
| C | 3.98101900  | -0.43926600 | 2.36259200  |
| C | 3.46817400  | -1.63731700 | 1.79182900  |
| C | 5.22525700  | -0.44537200 | 2.99073600  |
| C | 4.27414400  | -2.80474400 | 1.88361000  |
| C | 5.99531700  | -1.60817300 | 3.09268400  |
| H | 5.59896800  | 0.48612100  | 3.40956100  |
| C | 5.51268300  | -2.78619900 | 2.52980500  |
| H | 6.95830700  | -1.59056800 | 3.59215600  |
| H | 6.09933000  | -3.69692200 | 2.58217800  |
| O | 2.29001800  | -1.70030600 | 1.20456700  |
| C | 3.77279700  | -4.06006700 | 1.25044200  |
| F | 3.56176000  | -3.92376500 | -0.08900500 |
| F | 2.59113900  | -4.48721100 | 1.77004200  |
| F | 4.63998700  | -5.09337500 | 1.38929400  |
| C | 1.18557300  | 2.54203500  | -0.48793900 |
| C | 1.88974300  | 3.16132400  | -1.71615300 |
| C | 1.99455100  | 4.55105800  | -1.87729300 |
| C | 2.42947300  | 2.34145800  | -2.71373700 |
| C | 2.65465400  | 5.10086900  | -2.97683100 |
| H | 1.54816500  | 5.21362800  | -1.14311400 |
| C | 3.08611900  | 2.88572500  | -3.81942600 |
| H | 2.34143100  | 1.26652700  | -2.62279900 |
| H | 2.72637000  | 6.18056900  | -3.07428700 |
| H | 3.49924000  | 2.22439500  | -4.57616700 |
| C | -0.07130100 | 3.38944400  | -0.19319100 |

|    |             |             |             |
|----|-------------|-------------|-------------|
| C  | -1.15862500 | 3.26143200  | -1.07156300 |
| C  | -0.18592500 | 4.28707400  | 0.87352700  |
| C  | -2.33086600 | 3.98907600  | -0.87974800 |
| H  | -1.08162300 | 2.58371400  | -1.91523000 |
| C  | -1.36248900 | 5.01956800  | 1.07127700  |
| H  | 0.63706000  | 4.43519700  | 1.56394000  |
| H  | -3.16011900 | 3.86658400  | -1.57109800 |
| H  | -1.42863200 | 5.70650200  | 1.91038400  |
| O  | 0.77055900  | 1.23535200  | -0.79020200 |
| Cu | 1.41083700  | -0.20096500 | 0.33565800  |
| C  | -3.62838500 | -0.10290800 | -0.01060000 |
| H  | -4.01333200 | 0.48934900  | -0.85164500 |
| H  | -4.49118700 | -0.59545100 | 0.45721700  |
| C  | -1.40485400 | -0.78756600 | 0.27461200  |
| C  | -1.69065600 | 0.37413400  | 1.18737700  |
| O  | -0.22728200 | -1.35535300 | 0.24149700  |
| O  | -0.90756700 | 0.87768200  | 2.01611500  |
| C  | -2.54757100 | -1.06890000 | -0.41867500 |
| C  | -2.74700400 | -2.13594900 | -1.48788800 |
| H  | -2.34661500 | -3.08214900 | -1.10949300 |
| C  | -4.21906600 | -2.34368000 | -1.79147200 |
| C  | -4.91650300 | -3.36237400 | -1.13099000 |
| C  | -4.92096300 | -1.50545400 | -2.66783800 |
| C  | -6.28422600 | -3.54529400 | -1.34298700 |
| H  | -4.38109000 | -4.01566600 | -0.44687100 |
| C  | -6.28842900 | -1.68655300 | -2.88294700 |
| H  | -4.40259900 | -0.70297900 | -3.18509700 |
| C  | -6.97498700 | -2.70710100 | -2.22111400 |

|   |             |             |             |
|---|-------------|-------------|-------------|
| H | -6.80760200 | -4.34434600 | -0.82570900 |
| H | -6.81641600 | -1.02856900 | -3.56725900 |
| H | -8.03849000 | -2.84896600 | -2.38986500 |
| N | -2.96351300 | 0.76748400  | 0.94875700  |
| C | 0.44217400  | -1.48785700 | -2.70486400 |
| C | -0.54931100 | -2.46720400 | -2.82204800 |
| C | -0.18328900 | -3.80286400 | -2.89714900 |
| C | 1.18322700  | -4.12119500 | -2.85079900 |
| C | 2.15683300  | -3.12279400 | -2.73326800 |
| C | 1.79785600  | -1.77073100 | -2.65749400 |
| C | -1.48721800 | -0.34188500 | -2.65777000 |
| C | -1.89889900 | -1.78303400 | -2.77379800 |
| H | -0.93226600 | -4.58479000 | -2.97636300 |
| H | 1.48981800  | -5.16120700 | -2.90353400 |
| H | 3.20531700  | -3.39721700 | -2.69110000 |
| H | 2.54244100  | -0.98892200 | -2.55458400 |
| H | 0.27781700  | 0.61402400  | -2.11833700 |
| H | -2.13869700 | 0.51834600  | -2.57832300 |
| H | -2.48579000 | -1.96622500 | -3.67996600 |
| N | -0.19724900 | -0.21900200 | -2.60625600 |
| C | -2.44027900 | 4.87221400  | 0.19958500  |
| H | -3.35443300 | 5.43752100  | 0.35571200  |
| C | 3.20919700  | 4.26949800  | -3.95302300 |
| H | 3.71988700  | 4.69595600  | -4.81160000 |
| C | -3.66460000 | 1.79973300  | 1.69594800  |
| H | -2.89792300 | 2.43780100  | 2.14221700  |
| H | -4.24029900 | 2.40714800  | 0.99171700  |
| C | -4.57269500 | 1.21663700  | 2.75724300  |

|   |             |             |            |
|---|-------------|-------------|------------|
| C | -4.02171200 | 0.60488800  | 3.89211100 |
| C | -5.96206600 | 1.23958100  | 2.60251700 |
| C | -4.84877500 | 0.03031500  | 4.85653800 |
| H | -2.94170000 | 0.58058600  | 4.01116200 |
| C | -6.79359800 | 0.66511500  | 3.56825300 |
| H | -6.39286400 | 1.70925500  | 1.72190700 |
| C | -6.23831200 | 0.05957900  | 4.69667900 |
| H | -4.41186600 | -0.43853600 | 5.73373500 |
| H | -7.87168300 | 0.68930100  | 3.43674900 |
| H | -6.88241900 | -0.38770100 | 5.44834000 |

**(S)-3a**

|   |             |             |             |
|---|-------------|-------------|-------------|
| C | 1.00894300  | -0.76458600 | -0.67063300 |
| H | 0.44135500  | -0.93063100 | -1.59339000 |
| H | 1.42223400  | 0.24958100  | -0.71607900 |
| C | 0.78717100  | -1.90958300 | 1.31784200  |
| C | 2.03452400  | -2.36297100 | 0.66525200  |
| O | 2.85107700  | -3.16047900 | 1.15479200  |
| C | 0.17829900  | -0.97475900 | 0.56998700  |
| C | -1.10782900 | -0.24342200 | 0.85034200  |
| H | -1.34747100 | -0.41389900 | 1.90763600  |
| C | -0.89530300 | 1.26145400  | 0.68149700  |
| C | -0.54594300 | 2.04076900  | 1.78927200  |
| C | -0.99611100 | 1.87447900  | -0.57302100 |
| C | -0.30369700 | 3.40876000  | 1.65006600  |
| H | -0.46429000 | 1.57037100  | 2.76600500  |
| C | -0.74944100 | 3.24032100  | -0.71671200 |
| H | -1.27602300 | 1.27883300  | -1.43694900 |
| C | -0.40354100 | 4.01269900  | 0.39491600  |



|   |             |             |             |
|---|-------------|-------------|-------------|
| H | -0.03910200 | 4.00137600  | 2.52132400  |
| H | -0.83222300 | 3.70233100  | -1.69653100 |
| H | -0.21679700 | 5.07697500  | 0.28403100  |
| N | 2.08909600  | -1.74242400 | -0.54440600 |
| C | -4.34208200 | -1.05554900 | -0.91590700 |
| C | -3.59309400 | -0.23951400 | -0.01872000 |
| C | -4.23429200 | 0.83976700  | 0.61569900  |
| C | -5.57828600 | 1.07562800  | 0.34888400  |
| C | -6.30012400 | 0.25492300  | -0.54441300 |
| C | -5.69373000 | -0.81921600 | -1.18778800 |
| C | -2.23834800 | -1.85135600 | -0.83584500 |
| C | -2.25082400 | -0.76991200 | 0.01303700  |
| H | -3.68555000 | 1.47957600  | 1.30023000  |
| H | -6.08400800 | 1.90625100  | 0.83308500  |
| H | -7.34876100 | 0.46583100  | -0.73366800 |
| H | -6.24529200 | -1.45306400 | -1.87600400 |
| H | -3.73797500 | -2.75450200 | -2.05053200 |
| H | -1.43202800 | -2.52639700 | -1.08306800 |
| N | -3.48932200 | -2.02733400 | -1.39463800 |
| C | 3.31528800  | -1.63531700 | -1.33212800 |
| H | 3.89882700  | -2.53575100 | -1.12663900 |
| H | 3.04464900  | -1.63936800 | -2.39133300 |
| C | 4.10414800  | -0.38836600 | -0.99409600 |
| C | 4.79534300  | -0.29922900 | 0.22214200  |
| C | 4.10973400  | 0.70797600  | -1.86227100 |
| C | 5.48281000  | 0.86591700  | 0.55958900  |
| H | 4.78926200  | -1.14621900 | 0.90251900  |
| C | 4.79823100  | 1.87645100  | -1.52637900 |

|   |            |             |             |
|---|------------|-------------|-------------|
| H | 3.57101700 | 0.64417200  | -2.80424700 |
| C | 5.48532900 | 1.95746500  | -0.31437900 |
| H | 6.01841200 | 0.92312000  | 1.50295700  |
| H | 4.79493900 | 2.72114900  | -2.20939000 |
| H | 6.02140200 | 2.86470400  | -0.05089500 |
| O | 0.42182700 | -2.42190900 | 2.52369800  |
| H | 1.12272100 | -3.05402700 | 2.77893300  |

**Int-IV**

|   |             |             |             |
|---|-------------|-------------|-------------|
| C | -2.94567500 | -2.48614000 | 0.85921100  |
| C | -3.98067000 | -0.84018100 | -0.51312000 |
| C | -5.12993800 | -1.53320900 | 0.23909800  |
| C | -4.43389100 | -2.44800200 | 1.27557400  |
| H | -2.53413900 | -3.49336700 | 0.80344200  |
| H | -2.32959400 | -1.91163000 | 1.54551500  |
| H | -4.21565400 | -0.66758600 | -1.56460200 |
| H | -5.81216300 | -0.82258000 | 0.70552500  |
| H | -5.71371300 | -2.12801500 | -0.46939800 |
| H | -4.52812200 | -2.04584400 | 2.28742200  |
| H | -4.87291100 | -3.44896200 | 1.27093400  |
| N | -2.87359500 | -1.85146400 | -0.49267500 |
| C | -3.05201900 | -2.88593700 | -1.56634100 |
| H | -4.00501500 | -3.40913400 | -1.43036600 |
| H | -3.09362100 | -2.34381800 | -2.51612800 |
| C | -1.91932000 | -3.87624400 | -1.55150600 |
| C | -0.59896700 | -3.40066300 | -1.77180100 |
| C | -2.13330300 | -5.22692200 | -1.28554500 |
| C | 0.46900800  | -4.32803300 | -1.67624000 |
| C | -1.07280100 | -6.13844600 | -1.22734100 |

|   |             |             |             |
|---|-------------|-------------|-------------|
| H | -3.15081900 | -5.57050500 | -1.11458600 |
| C | 0.22859900  | -5.68046300 | -1.41675000 |
| H | -1.26003700 | -7.18738100 | -1.02267300 |
| H | 1.06415500  | -6.36939500 | -1.35541300 |
| O | -0.35903100 | -2.13277100 | -2.05665200 |
| C | 1.86074500  | -3.82378700 | -1.87578100 |
| F | 2.18127700  | -2.79437900 | -1.04320300 |
| F | 2.07904500  | -3.35833300 | -3.13452600 |
| F | 2.79438500  | -4.78476600 | -1.65940400 |
| C | -3.48413200 | 0.54102400  | 0.06142800  |
| C | -3.55348700 | 0.61517800  | 1.60416200  |
| C | -4.73887100 | 0.95488200  | 2.27228600  |
| C | -2.41314900 | 0.36046900  | 2.37531100  |
| C | -4.79009000 | 1.00660900  | 3.66659000  |
| H | -5.62967200 | 1.19488700  | 1.70120100  |
| C | -2.45722300 | 0.41464800  | 3.76948000  |
| H | -1.48303300 | 0.10606700  | 1.88364900  |
| H | -5.72166700 | 1.27047100  | 4.15956800  |
| H | -1.55624300 | 0.20894000  | 4.34132300  |
| C | -4.34667400 | 1.68630900  | -0.50746500 |
| C | -3.86932800 | 2.99746100  | -0.34598200 |
| C | -5.57133300 | 1.50520800  | -1.15954500 |
| C | -4.58043800 | 4.08929900  | -0.83756100 |
| H | -2.93147600 | 3.16168400  | 0.17230200  |
| C | -6.29165500 | 2.60096300  | -1.65016400 |
| H | -5.98879100 | 0.51384600  | -1.29266300 |
| H | -4.18402600 | 5.09233700  | -0.70555600 |
| H | -7.23976500 | 2.43322000  | -2.15358200 |

|    |             |             |             |
|----|-------------|-------------|-------------|
| O  | -2.15863100 | 0.75474400  | -0.37030700 |
| Cu | -1.21113500 | -0.78379600 | -0.95951700 |
| C  | 3.29774800  | 0.70845100  | 1.12949400  |
| H  | 4.29399500  | 0.29485500  | 0.93805000  |
| H  | 3.39122300  | 1.52382400  | 1.85488400  |
| C  | 1.38555700  | 0.35903300  | -0.24538900 |
| C  | 1.31651200  | -0.56822300 | 0.95822900  |
| O  | 0.53416800  | 0.37884000  | -1.15167500 |
| O  | 0.41559800  | -1.38680000 | 1.19075000  |
| C  | 2.59022400  | 1.13549000  | -0.12967500 |
| C  | 2.88258600  | 2.10030200  | -1.04478600 |
| H  | 2.16860900  | 2.17930200  | -1.86168500 |
| C  | 3.97423900  | 3.04235000  | -1.10611600 |
| C  | 4.00412500  | 3.92137300  | -2.21113000 |
| C  | 4.97686500  | 3.16175300  | -0.11883500 |
| C  | 4.99753700  | 4.88670300  | -2.32859100 |
| H  | 3.22955000  | 3.83926100  | -2.96702900 |
| C  | 5.96474500  | 4.13194300  | -0.23804400 |
| H  | 4.98591000  | 2.50527500  | 0.74134200  |
| C  | 5.97854500  | 4.99612600  | -1.33953900 |
| H  | 5.00551700  | 5.55580200  | -3.18328000 |
| H  | 6.72841700  | 4.21838000  | 0.52858800  |
| H  | 6.75353500  | 5.75196200  | -1.42458700 |
| N  | 2.42408300  | -0.33214900 | 1.68164900  |
| C  | 0.10276500  | 3.56904700  | 0.06712100  |
| C  | 1.12690300  | 4.23736400  | 0.80897600  |
| C  | 1.78044000  | 5.33666000  | 0.22271700  |
| C  | 1.41874100  | 5.72972400  | -1.06034700 |

|   |             |             |             |
|---|-------------|-------------|-------------|
| C | 0.41173200  | 5.04698300  | -1.78071700 |
| C | -0.25928300 | 3.96055400  | -1.22914600 |
| C | 0.31067700  | 2.52647100  | 2.04117000  |
| C | 1.23610700  | 3.54594700  | 2.06415100  |
| H | 2.56853700  | 5.85874900  | 0.75864700  |
| H | 1.92538900  | 6.56973300  | -1.52663400 |
| H | 0.15708400  | 5.37857700  | -2.78333200 |
| H | -1.04134700 | 3.43738700  | -1.77085500 |
| H | -1.08232300 | 1.85740700  | 0.52495400  |
| H | 0.07183400  | 1.79062800  | 2.79533000  |
| H | 1.90991600  | 3.77721100  | 2.87801600  |
| N | -0.38442100 | 2.54833900  | 0.84867300  |
| C | -5.79926400 | 3.89552300  | -1.49609900 |
| H | -6.35709400 | 4.74482300  | -1.87999000 |
| C | -3.64861300 | 0.73354200  | 4.42373900  |
| H | -3.68551200 | 0.77882500  | 5.50840400  |
| C | 2.83269300  | -1.14133700 | 2.82954400  |
| H | 3.26329500  | -0.47017800 | 3.57710500  |
| H | 1.92507800  | -1.58673300 | 3.24246600  |
| C | 3.82910300  | -2.20389500 | 2.41861700  |
| C | 5.19374900  | -2.04133900 | 2.67862800  |
| C | 3.39438200  | -3.33525900 | 1.71487600  |
| C | 6.11471300  | -2.99818900 | 2.24388800  |
| H | 5.53292100  | -1.16352100 | 3.22235700  |
| C | 4.31304500  | -4.28585900 | 1.27151600  |
| H | 2.33742700  | -3.45988200 | 1.50303800  |
| C | 5.67575900  | -4.11990700 | 1.53754300  |
| H | 7.17220000  | -2.86442700 | 2.45297700  |

|   |            |             |            |
|---|------------|-------------|------------|
| H | 3.96567600 | -5.14919600 | 0.71254900 |
| H | 6.39139700 | -4.86121800 | 1.19377100 |

**TS-II**

|   |             |             |             |
|---|-------------|-------------|-------------|
| C | -1.83306200 | -3.20201300 | 1.12887200  |
| C | -3.48443000 | -2.10512100 | -0.20667800 |
| C | -4.25478100 | -3.09738100 | 0.68040300  |
| C | -3.20722000 | -3.65254300 | 1.67447700  |
| H | -1.11230200 | -4.01498100 | 1.04569600  |
| H | -1.39332300 | -2.43203100 | 1.75639700  |
| H | -3.82902700 | -2.11932200 | -1.24124300 |
| H | -5.09964500 | -2.62733700 | 1.18539600  |
| H | -4.65615400 | -3.90057500 | 0.05576600  |
| H | -3.35942700 | -3.24931400 | 2.67858200  |
| H | -3.26968300 | -4.74192600 | 1.73943700  |
| N | -2.08139700 | -2.63341100 | -0.23405100 |
| C | -1.94816800 | -3.71306900 | -1.26999400 |
| H | -2.64019700 | -4.53238800 | -1.04405700 |
| H | -2.25009800 | -3.26656900 | -2.22236800 |
| C | -0.54295800 | -4.24009200 | -1.35193300 |
| C | 0.48981100  | -3.34386000 | -1.73895400 |
| C | -0.23989800 | -5.56656600 | -1.05578300 |
| C | 1.81541700  | -3.84643300 | -1.80542400 |
| C | 1.07069400  | -6.05163600 | -1.13528000 |
| H | -1.04635400 | -6.23244100 | -0.75729400 |
| C | 2.09350200  | -5.18503700 | -1.51189800 |
| H | 1.28887300  | -7.08899900 | -0.90392300 |
| H | 3.11537000  | -5.54304600 | -1.57481900 |
| O | 0.22530600  | -2.08520000 | -2.03276000 |

|    |             |             |             |
|----|-------------|-------------|-------------|
| C  | 2.90833200  | -2.92197200 | -2.23230400 |
| F  | 3.01214100  | -1.80773900 | -1.45802600 |
| F  | 2.74564300  | -2.46997700 | -3.50513000 |
| F  | 4.12953900  | -3.51640900 | -2.19631200 |
| C  | -3.50808300 | -0.59993400 | 0.23089200  |
| C  | -3.30660000 | -0.42610800 | 1.75075400  |
| C  | -4.37680200 | -0.50698000 | 2.65259900  |
| C  | -2.02748200 | -0.18649600 | 2.26647300  |
| C  | -4.16913200 | -0.37755000 | 4.02750900  |
| H  | -5.38424700 | -0.66147300 | 2.28064800  |
| C  | -1.81271400 | -0.05388600 | 3.63886100  |
| H  | -1.18783800 | -0.12496800 | 1.58615500  |
| H  | -5.01484000 | -0.44540900 | 4.70611600  |
| H  | -0.80663700 | 0.12636200  | 4.00810700  |
| C  | -4.84180400 | 0.05833100  | -0.17879300 |
| C  | -5.00207400 | 1.42789500  | 0.09355300  |
| C  | -5.88293500 | -0.60426000 | -0.83851500 |
| C  | -6.14393900 | 2.11806700  | -0.30455600 |
| H  | -4.22750200 | 1.95858400  | 0.63565200  |
| C  | -7.03781800 | 0.08312500  | -1.23137100 |
| H  | -5.82174600 | -1.66421900 | -1.05460000 |
| H  | -6.23493100 | 3.17834400  | -0.08579900 |
| H  | -7.83113800 | -0.45704800 | -1.74041900 |
| O  | -2.48070000 | 0.06121300  | -0.48006800 |
| Cu | -0.91574300 | -1.05151400 | -0.80188200 |
| C  | 2.89066800  | 1.46431400  | 1.59546100  |
| H  | 3.95347100  | 1.58771500  | 1.35194500  |
| H  | 2.68073800  | 2.08014000  | 2.47880700  |

|   |             |             |             |
|---|-------------|-------------|-------------|
| C | 1.27779900  | 0.60313200  | 0.11486500  |
| C | 1.70068700  | -0.48647600 | 1.05869000  |
| O | 0.36457300  | 0.46478700  | -0.78638200 |
| O | 1.28222900  | -1.65685800 | 1.09016000  |
| C | 1.97167800  | 1.75183100  | 0.43994600  |
| C | 1.64775400  | 3.00882900  | -0.18912200 |
| H | 1.13805800  | 2.84701200  | -1.13567900 |
| C | 2.60111900  | 4.14163600  | -0.25417600 |
| C | 2.72746800  | 4.83658700  | -1.46857200 |
| C | 3.37151800  | 4.55723300  | 0.84570100  |
| C | 3.61596800  | 5.90533600  | -1.58915700 |
| H | 2.12804500  | 4.52828600  | -2.31966900 |
| C | 4.25527500  | 5.62684500  | 0.72519000  |
| H | 3.26214100  | 4.06251000  | 1.80414500  |
| C | 4.38327900  | 6.30273700  | -0.49271200 |
| H | 3.70596200  | 6.42706900  | -2.53727700 |
| H | 4.84252600  | 5.93751000  | 1.58425700  |
| H | 5.07326100  | 7.13652400  | -0.58258300 |
| N | 2.60390500  | 0.06368000  | 1.90901000  |
| C | -1.72358500 | 3.69501000  | -0.76145100 |
| C | -0.66598100 | 4.55411400  | -0.37812000 |
| C | -0.47546800 | 5.74912600  | -1.07378200 |
| C | -1.34209600 | 6.04836800  | -2.12996900 |
| C | -2.38012100 | 5.17572300  | -2.49587300 |
| C | -2.58970800 | 3.97515200  | -1.81153500 |
| C | -0.72243200 | 2.70921400  | 0.97246600  |
| C | 0.06815400  | 3.87210700  | 0.69793900  |
| H | 0.32511300  | 6.42919100  | -0.80335100 |



|              |             |             |             |
|--------------|-------------|-------------|-------------|
| H            | -1.21145100 | 6.97635000  | -2.67842600 |
| H            | -3.03572200 | 5.44036600  | -3.31960200 |
| H            | -3.39808800 | 3.29897900  | -2.07089500 |
| H            | -2.17888500 | 1.65169600  | -0.07785700 |
| H            | -0.53061200 | 1.94372200  | 1.70796600  |
| H            | 0.59390200  | 4.38977500  | 1.49016800  |
| N            | -1.71082400 | 2.58443000  | 0.10308300  |
| C            | -7.17163500 | 1.44579300  | -0.97430000 |
| H            | -8.06602300 | 1.97873200  | -1.28374200 |
| C            | -2.88469400 | -0.15245900 | 4.52824700  |
| H            | -2.72333500 | -0.04772400 | 5.59727400  |
| C            | 3.47361200  | -0.72774900 | 2.77572300  |
| H            | 3.68184200  | -0.14192600 | 3.67488600  |
| H            | 2.90786300  | -1.61552800 | 3.06763400  |
| C            | 4.76195900  | -1.11183300 | 2.07855100  |
| C            | 5.95168500  | -0.42762900 | 2.34998800  |
| C            | 4.76136400  | -2.12028700 | 1.10442900  |
| C            | 7.12545600  | -0.74416700 | 1.66066400  |
| H            | 5.95638200  | 0.35535800  | 3.10402100  |
| C            | 5.92929200  | -2.43167600 | 0.40897900  |
| H            | 3.84132400  | -2.65144100 | 0.88468100  |
| C            | 7.11530900  | -1.74528500 | 0.68737600  |
| H            | 8.04360700  | -0.20729600 | 1.88179100  |
| H            | 5.90968800  | -3.20432500 | -0.35325600 |
| H            | 8.02555800  | -1.98938600 | 0.14709600  |
| <b>Int-V</b> |             |             |             |
| C            | -2.27185000 | -2.82195600 | 1.17721100  |
| C            | -3.76263200 | -1.47267200 | -0.09750900 |

|   |             |             |             |
|---|-------------|-------------|-------------|
| C | -4.65758500 | -2.33909400 | 0.80685100  |
| C | -3.68312200 | -3.09352600 | 1.74318000  |
| H | -1.65896100 | -3.71804800 | 1.08527600  |
| H | -1.73148500 | -2.11095400 | 1.79577500  |
| H | -4.14071000 | -1.41312500 | -1.11876500 |
| H | -5.38656300 | -1.74388000 | 1.35727900  |
| H | -5.21904800 | -3.04334400 | 0.18652800  |
| H | -3.75088000 | -2.72655400 | 2.77031800  |
| H | -3.90520700 | -4.16380100 | 1.75559400  |
| N | -2.46881600 | -2.22275300 | -0.17987000 |
| C | -2.56390000 | -3.30651100 | -1.21583900 |
| H | -3.39554700 | -3.97877200 | -0.97687000 |
| H | -2.79227600 | -2.80744300 | -2.16274500 |
| C | -1.28747500 | -4.09135200 | -1.31760300 |
| C | -0.10810700 | -3.40431400 | -1.71342100 |
| C | -1.23860500 | -5.45088800 | -1.02078400 |
| C | 1.10037200  | -4.14709300 | -1.77812100 |
| C | -0.04315600 | -6.17395000 | -1.10534700 |
| H | -2.15420200 | -5.95255100 | -0.71583500 |
| C | 1.12304500  | -5.51387100 | -1.48355400 |
| H | -0.02258700 | -7.23371300 | -0.87356300 |
| H | 2.05998600  | -6.05675500 | -1.54597100 |
| O | -0.13513200 | -2.12110700 | -2.01492900 |
| C | 2.34767600  | -3.44524200 | -2.20448900 |
| F | 2.63926500  | -2.35354700 | -1.44743800 |
| F | 2.28602000  | -2.99722800 | -3.48765600 |
| F | 3.44225100  | -4.24809800 | -2.13631100 |
| C | -3.52530400 | 0.00690300  | 0.35494200  |

|    |             |             |             |
|----|-------------|-------------|-------------|
| C  | -3.24117100 | 0.14438400  | 1.86433100  |
| C  | -4.27856400 | 0.19856100  | 2.80569600  |
| C  | -1.92301900 | 0.23114400  | 2.32845500  |
| C  | -4.00423700 | 0.30642500  | 4.17043800  |
| H  | -5.31090800 | 0.17267700  | 2.47314600  |
| C  | -1.64256800 | 0.34471300  | 3.69097400  |
| H  | -1.10788400 | 0.18939200  | 1.61822600  |
| H  | -4.82551600 | 0.34452700  | 4.88057400  |
| H  | -0.60981700 | 0.40668200  | 4.02213000  |
| C  | -4.74323600 | 0.88215000  | -0.00549700 |
| C  | -4.65852300 | 2.25967100  | 0.25950600  |
| C  | -5.91161700 | 0.40046100  | -0.60648200 |
| C  | -5.68918200 | 3.12893500  | -0.08840700 |
| H  | -3.77921500 | 2.65695500  | 0.75488300  |
| C  | -6.95481800 | 1.26928600  | -0.94789500 |
| H  | -6.03762900 | -0.65504500 | -0.81573800 |
| H  | -5.59141900 | 4.19019700  | 0.12223900  |
| H  | -7.85139000 | 0.86743300  | -1.41140000 |
| O  | -2.42366300 | 0.48565900  | -0.39506100 |
| Cu | -1.04589200 | -0.87091500 | -0.78464000 |
| C  | 2.84796200  | 1.26889200  | 1.64544600  |
| H  | 3.93170400  | 1.23005000  | 1.47495800  |
| H  | 2.67430100  | 1.98668700  | 2.45764000  |
| C  | 1.28409100  | 0.52950500  | 0.05808200  |
| C  | 1.48049100  | -0.53656000 | 1.09476700  |
| O  | 0.45778200  | 0.40857400  | -0.95539700 |
| O  | 0.94062800  | -1.65829800 | 1.12796100  |
| C  | 2.07443400  | 1.58895800  | 0.40160300  |

|   |             |             |             |
|---|-------------|-------------|-------------|
| C | 2.05404900  | 2.92322500  | -0.30614900 |
| H | 1.87140100  | 2.69793400  | -1.35990500 |
| C | 3.35106300  | 3.69907100  | -0.21788100 |
| C | 4.17247100  | 3.79946200  | -1.34704800 |
| C | 3.77147800  | 4.30007300  | 0.97740200  |
| C | 5.39194400  | 4.47784300  | -1.28543500 |
| H | 3.85295600  | 3.34055500  | -2.27886800 |
| C | 4.98974800  | 4.97624700  | 1.04255900  |
| H | 3.14284500  | 4.24234800  | 1.86169200  |
| C | 5.80517900  | 5.06666200  | -0.08914500 |
| H | 6.01538100  | 4.54718700  | -2.17227900 |
| H | 5.30142600  | 5.43469900  | 1.97670700  |
| H | 6.75208700  | 5.59620700  | -0.03862000 |
| N | 2.34805700  | -0.05057500 | 2.02868700  |
| C | -1.11927500 | 3.53860700  | -1.17604300 |
| C | 0.05596700  | 4.29524600  | -1.07088800 |
| C | 0.37681000  | 5.20105500  | -2.07127100 |
| C | -0.51146000 | 5.33754600  | -3.14995800 |
| C | -1.68295400 | 4.57535300  | -3.22993900 |
| C | -2.01040900 | 3.64810300  | -2.23156800 |
| C | -0.20724700 | 2.87539200  | 0.75499700  |
| C | 0.80201500  | 3.80839300  | 0.14855600  |
| H | 1.29061000  | 5.78492700  | -2.02589600 |
| H | -0.28396300 | 6.04761500  | -3.93902600 |
| H | -2.35047300 | 4.70424500  | -4.07596300 |
| H | -2.91770800 | 3.05490000  | -2.27070800 |
| H | -1.86815000 | 1.79366000  | -0.03630100 |
| H | -0.11961500 | 2.34722600  | 1.69335200  |

|   |             |             |             |
|---|-------------|-------------|-------------|
| H | 1.11490400  | 4.58890200  | 0.84509700  |
| N | -1.21751300 | 2.69325900  | -0.03434700 |
| C | -6.84728400 | 2.63560700  | -0.69783200 |
| H | -7.65562100 | 3.30914300  | -0.96715700 |
| C | -2.68384800 | 0.37863100  | 4.62040900  |
| H | -2.47033400 | 0.46861900  | 5.68157400  |
| C | 3.12440100  | -0.93184300 | 2.90277100  |
| H | 3.39561500  | -0.36925000 | 3.79969400  |
| H | 2.46306300  | -1.74914700 | 3.19943200  |
| C | 4.36267500  | -1.46025100 | 2.20791000  |
| C | 5.62800000  | -0.94030400 | 2.50135200  |
| C | 4.24217700  | -2.42976600 | 1.20177800  |
| C | 6.75577900  | -1.37949300 | 1.80183000  |
| H | 5.72827600  | -0.18661600 | 3.27832700  |
| C | 5.36326200  | -2.85992600 | 0.49318300  |
| H | 3.26511500  | -2.83402100 | 0.96358700  |
| C | 6.62485400  | -2.33704400 | 0.79389700  |
| H | 7.73284800  | -0.96868400 | 2.04008800  |
| H | 5.24627200  | -3.59539100 | -0.29731700 |
| H | 7.49956800  | -2.67249800 | 0.24399200  |

**(R)-3a**

|   |             |             |             |
|---|-------------|-------------|-------------|
| C | -1.00901600 | -0.76451600 | -0.67075300 |
| H | -1.42245200 | 0.24959200  | -0.71613100 |
| H | -0.44139900 | -0.93043400 | -1.59351700 |
| C | -0.78708100 | -1.90965600 | 1.31763700  |
| C | -2.03436900 | -2.36316900 | 0.66501100  |
| O | -2.85080300 | -3.16084400 | 1.15447900  |
| C | -0.17837300 | -0.97466300 | 0.56985000  |

|   |             |             |             |
|---|-------------|-------------|-------------|
| C | 1.10770400  | -0.24326900 | 0.85033100  |
| H | 1.34722700  | -0.41373700 | 1.90765500  |
| C | 0.89519400  | 1.26159300  | 0.68142600  |
| C | 0.54590600  | 2.04100300  | 1.78915400  |
| C | 0.99598000  | 1.87454100  | -0.57313800 |
| C | 0.30370300  | 3.40899500  | 1.64986300  |
| H | 0.46427100  | 1.57068400  | 2.76592600  |
| C | 0.74935200  | 3.24038000  | -0.71691500 |
| H | 1.27584400  | 1.27884300  | -1.43704700 |
| C | 0.40351800  | 4.01284900  | 0.39467300  |
| H | 0.03916700  | 4.00166700  | 2.52110100  |
| H | 0.83212100  | 3.70231200  | -1.69677100 |
| H | 0.21680100  | 5.07712200  | 0.28371800  |
| N | -2.08904300 | -1.74253500 | -0.54461400 |
| C | 4.34206800  | -1.05570300 | -0.91559300 |
| C | 3.59301600  | -0.23943100 | -0.01866900 |
| C | 4.23418300  | 0.84003900  | 0.61548100  |
| C | 5.57816500  | 1.07586900  | 0.34862000  |
| C | 6.30005900  | 0.25494000  | -0.54443900 |
| C | 5.69372000  | -0.81940700 | -1.18750400 |
| C | 2.23833900  | -1.85150100 | -0.83545400 |
| C | 2.25074600  | -0.76979200 | 0.01309900  |
| H | 3.68539400  | 1.48000600  | 1.29982600  |
| H | 6.08385200  | 1.90664300  | 0.83259800  |
| H | 7.34869000  | 0.46584100  | -0.73373100 |
| H | 6.24530000  | -1.45342600 | -1.87554900 |
| H | 3.73792700  | -2.75465400 | -2.05016300 |
| H | 1.43203800  | -2.52661200 | -1.08253500 |

|   |             |             |             |
|---|-------------|-------------|-------------|
| N | 3.48937500  | -2.02767200 | -1.39404100 |
| C | -3.31536400 | -1.63534200 | -1.33215800 |
| H | -3.04484600 | -1.63933900 | -2.39139100 |
| H | -3.89889300 | -2.53578300 | -1.12665700 |
| C | -4.10415100 | -0.38838100 | -0.99397300 |
| C | -4.10982300 | 0.70799400  | -1.86211300 |
| C | -4.79522800 | -0.29927400 | 0.22233700  |
| C | -4.79825300 | 1.87647400  | -1.52610200 |
| H | -3.57121700 | 0.64420300  | -2.80415300 |
| C | -5.48262800 | 0.86587700  | 0.55990100  |
| H | -4.78912800 | -1.14629800 | 0.90266700  |
| C | -5.48521000 | 1.95746100  | -0.31402100 |
| H | -4.79502000 | 2.72119600  | -2.20908400 |
| H | -6.01813400 | 0.92305700  | 1.50332500  |
| H | -6.02123200 | 2.86470200  | -0.05044000 |
| O | -0.42160000 | -2.42206400 | 2.52340000  |
| H | -1.12236500 | -3.05433100 | 2.77859900  |

## References:

1. (a) R. Feltham and I. Brant. *J. Am. chem. Soc.*, **1982**, *104*, 641. (b) M. Bressan, C. Furlam and G. Polzonett. *Polyhedron*, **1983**, *2*, 523.
2. Frisch, M. J.; Trucks, G. W.; Schlegel, H. B.; Scuseria, G. E.; Robb, M. A.; Cheeseman, J. R.; Scalmani, G.; Barone, V.; Petersson, G. A.; Nakatsuji, H.; Li, X.; Caricato, M.; Marenich, A. V.; Bloino, J.; Janesko, B. G.; Gomperts, R.; Mennucci, B.; Hratchian, H. P.; Ortiz, J. V.; Izmaylov, A. F.; Sonnenberg, J. L.; Williams-Young, D.; Ding, F.; Lipparini, F.; Egidi, F.; Goings, J.; Peng, B.; Petrone, A.; Henderson, T.; Ranasinghe, D.; Zakrzewski, V. G.; Gao, J.; Rega, N.; Zheng, G.; Liang, W.; Hada, M.; Ehara, M.; Toyota, K.; Fukuda, R.; Hasegawa, J.; Ishida, M.; Nakajima, T.; Honda, Y.; Kitao, O.; Nakai, H.; Vreven, T.; Throssell, K.; Jr. Montgomery, J. A.; Peralta, J. E.; Ogliaro, F.; Bearpark, M. J.; Heyd, J. J.; Brothers, E. N.; Kudin, K. N.; Staroverov, V. N.; Keith, T. A.; Kobayashi, R.; Normand, J.; Raghavachari, K.; Rendell, A. P.; Burant, J. C.; Iyengar, S. S.; Tomasi, J.; Cossi, M.; Millam, J. M.; Klene, M.; Adamo, C.; Cammi, R.; Ochterski, J. W.; Martin, R. L.; Morokuma, K.; Farkas, O.; Foresman, J. B.; Fox, D. J. Gaussian 16, Revision C.01, Gaussian, Inc., Wallingford CT, **2016**.
3. (a) Becke, A. D. *J. Chem. Phys.* **1993**, *98*, 5648. (b) Lee, C. T.; Yang, W. T.; Parr, R. G. *Phys. Rev. B* **1988**, *37*, 785.
4. (a) Grimme, S.; Antony, J.; Ehrlich, S.; Krieg, H. *J. Chem. Phys.* **2010**, *132*, 154104; (b) Grimme, S.; Ehrlich, S.; Goerigk, L. *J. Comput. Chem.* **2011**, *32*, 1456.
5. Marenich, A. V.; Cramer, C. J.; Truhlar, D. G. *J. Phys. Chem. B* **2009**, *113*, 6378.
6. Andrae, D.; Häußermann, U.; Dolg, M.; Stoll, H.; Preuß, H. *Theor. Chim. Acta* **1990**, *77*, 123.
7. Hehre, W. J.; Radom, L.; Schleyer, P. v. R.; Pople, J. A, *Ab Initio Molecular Orbital Theory*; Wiley: New York, **1986**.
8. (a) Fukui, K. *Acc. Chem. Res.* **1981**, *14*, 363. (b) Fukui, K. *J. Phys. Chem.* **1970**, *74*, 4161.
9. Legault, C. Y. CYLview, 1.0b; Université de Sherbrooke, **2009**; <http://www.cylview.org>.



10. Lindström, U. M. *Chem. Rev.* 2002, **102**, 2751.
11. Otto, S.; Engberts, J. B. F. N. *Pure and Applied Chemistry*, 2000, 72, 1365.
12. Cortes-Clerget, M.; Yu, J.; Kincaid, J. R. A.; Walde, P.; Gallou, F.; , Lipshutz, B. H. *Chem. Sci.*, 2021, **12**, 4237.
